# Supplementary material
Source: PubMed Central journal article supplement (PMC3469197)
Supplement: NIHMS410020-supplement-supporting_information_file1.pdf [file NIHMS410020-supplement-supporting_information_file1.pdf]

HEADER G PROTEIN-COUPLED RECEPTOR 08-JAN-98  
 TITLE MOLECULAR MODEL OF THE HUMAN P2Y1 PURINOCEPTOR  
 COMPND HUMAN P2Y1\_MRS2179;  
 COMPND 2 MOLECULE: HUMAN P2Y1 PURINOCEPTOR;  
 COMPND 3 CHAIN: 1, 2, 3, 4, 5, 6, 7;  
 COMPND 4 FRAGMENT: SEVEN TRANSMEMBRANE HELICES ONLY;  
 COMPND 5 SYNONYM: P2YR1, P2, PURINOCEPTOR-P2Y  
 SOURCE HUMAN P2Y1\_MRS2179;  
 SOURCE 2 ORGANISM\_Scientific: HOMO SAPIENS;  
 SOURCE 3 ORGANISM\_COMMON: HUMAN;  
 SOURCE 4 TISSUE: PLACENTA  
 KEYWDS P2 PURINOCEPTOR, G PROTEIN-COUPLED RECEPTOR  
 EXPDTA THEORETICAL MODEL  
 AUTHOR S.MORO,D.GUO,E.CAMAIONI,J.L.BOYER,T.K.HARDEN,K.A.JACOBSON  
 JRNL AUTH S.MORO,D.GUO,E.CAMAIONI,J.L.BOYER,T.K.HARDEN,K.A.JACOBSON  
 JRNL TTIL HUMAN P2Y1 RECEPTOR: MOLECULAR MODELING AND  
 JRNL TTIL 2 SITE-DIRECTED MUTAGENESIS AS TOOLS TO IDENTIFY  
 JRNL TTIL 3 AGONIST AND ANTAGONIST BINDING SITES.  
 REMARK 1  
 REMARK 1 REFERENCE 1  
 REMARK 1 AUTH A.M.VAN RHEE,B.FISCHER,P.J.M.VAN GALEN,K.A.JACOBSON  
 REMARK 1 TTIL MODELLING THE P2Y PURINOCEPTOR USING RHODOPSIN AS  
 REMARK 1 TTIL 2 TEMPLATE  
 REMARK 1 REFN ASTM DDDIEV SZ ISSN 1055-9612  
 REMARK 1 REFERENCE 2  
 REMARK 1 AUTH E.CAMAIONI,A.MOHANRAM,J.L.BOYER,T.K.HARDEN,K.A.JACOBSON  
 REMARK 1 TTIL DEOXYADENOSINE-BISPHOSPHATE DERIVATIVES AS POTENT  
 REMARK 1 TTIL 2 ANTAGONISTS AT P2Y1 RECEPTORS  
 REMARK 1 REFN ASTM JMC  
 SEQRES 1 32 ACE PHE TYR TYR LEU PRO ALA VAL TYR ILE LEU VAL PHE  
 SEQRES 2 32 ILE ILE GLY PHE LEU GLY ASN SER VAL ALA ILE TRP MET  
 SEQRES 3 32 PHE VAL PHE HIS MET ARG  
 SEQRES 1 28 ACE SER VAL TYR MET PHE ASN LEU ALA LEU ALA ASP PHE  
 SEQRES 2 28 LEU TYR VAL LEU THR LEU PRO ALA LEU ILE PHE TYR TYR  
 SEQRES 3 28 PHE ASN  
 SEQRES 1 26 ACE LYS LEU GLN ARG PHE ILE PHE HIS VAL ASN LEU TYR  
 SEQRES 2 26 GLY SER ILE LEU PHE LEU THR CYS ILE SER ALA HIS ARG  
 SEQRES 1 28 ACE LYS LYS LYS ASN ALA ILE CYS ILE SER VAL LEU VAL  
 SEQRES 2 28 TRP LEU ILE VAL VAL ALA ILE SER PRO ILE LEU PHE  
 SEQRES 3 28 TYR SER  
 SEQRES 1 30 ACE PHE ILE TYR SER MET CYS THR THR VAL ALA MET PHE  
 SEQRES 2 30 CYS VAL PRO LEU VAL LEU ILE LEU GLY CYS TYR GLY LEU  
 SEQRES 3 30 ILE VAL ARG ALA  
 SEQRES 1 29 ACE TYR LEU VAL ILE ILE VAL LEU THR VAL PHE ALA VAL  
 SEQRES 2 29 SER TYR ILE PRO PHE HIS VAL MET LYS THR MET ASN LEU  
 SEQRES 3 29 ARG ALA ARG  
 SEQRES 1 34 ACE ASP ARG VAL TYR ALA THR TYR GLN VAL THR ARG GLY  
 SEQRES 2 34 LEU ALA SER LEU ASN SER CYS VAL ASP PRO ILE LEU TYR  
 SEQRES 3 34 PHE LEU ALA GLY ASP THR PHE ARG  
 ATOM 1 C ACE 50 -6.542 17.505 -9.931 1.00 0.18  
 ATOM 2 O ACE 50 -7.457 17.075 -9.246 1.00 -0.40  
 ATOM 3 CH3 ACE 50 -6.687 17.520 -11.429 1.00 0.03  
 ATOM 4 H ACE 50 -5.860 16.956 -11.885 1.00 0.05  
 ATOM 5 H ACE 50 -6.665 18.558 -11.791 1.00 0.05  
 ATOM 6 H ACE 50 -7.639 17.058 -11.731 1.00 0.05  
 ATOM 7 N PHE 51 -5.417 17.990 -9.365 1.00 -0.26  
 ATOM 8 CA PHE 51 -5.213 17.892 -7.913 1.00 0.14  
 ATOM 9 C PHE 51 -6.131 18.790 -7.096 1.00 0.21

RECEIVED

JAN 20 1998

JOURNAL OF MEDICINAL  
CHEMISTRY

|      |    |     |     |    |         |        |         |      |       |
|------|----|-----|-----|----|---------|--------|---------|------|-------|
| ATOM | 10 | O   | PHE | 51 | -5.652  | 19.392 | -6.148  | 1.00 | -0.39 |
| ATOM | 11 | CB  | PHE | 51 | -3.748  | 18.256 | -7.529  | 1.00 | 0.02  |
| ATOM | 12 | CG  | PHE | 51 | -2.674  | 17.488 | -8.312  | 1.00 | -0.04 |
| ATOM | 13 | CD1 | PHE | 51 | -2.335  | 16.183 | -7.936  | 1.00 | -0.06 |
| ATOM | 14 | CD2 | PHE | 51 | -2.003  | 18.085 | -9.388  | 1.00 | -0.06 |
| ATOM | 15 | CE1 | PHE | 51 | -1.274  | 15.523 | -8.561  | 1.00 | -0.07 |
| ATOM | 16 | CE2 | PHE | 51 | -0.931  | 17.432 | -10.003 | 1.00 | -0.07 |
| ATOM | 17 | CZ  | PHE | 51 | -0.551  | 16.158 | -9.574  | 1.00 | -0.07 |
| ATOM | 18 | H   | PHE | 51 | -4.710  | 18.400 | -9.940  | 1.00 | 0.19  |
| ATOM | 19 | HA  | PHE | 51 | -5.400  | 16.853 | -7.595  | 1.00 | 0.08  |
| ATOM | 20 | HB2 | PHE | 51 | -3.575  | 18.064 | -6.457  | 1.00 | 0.05  |
| ATOM | 21 | HB1 | PHE | 51 | -3.613  | 19.334 | -7.695  | 1.00 | 0.05  |
| ATOM | 22 | HD1 | PHE | 51 | -2.891  | 15.678 | -7.152  | 1.00 | 0.06  |
| ATOM | 23 | HD2 | PHE | 51 | -2.303  | 19.061 | -9.755  | 1.00 | 0.06  |
| ATOM | 24 | HE1 | PHE | 51 | -1.008  | 14.516 | -8.261  | 1.00 | 0.06  |
| ATOM | 25 | HE2 | PHE | 51 | -0.393  | 17.913 | -10.815 | 1.00 | 0.06  |
| ATOM | 26 | HZ  | PHE | 51 | 0.300   | 15.661 | -10.028 | 1.00 | 0.06  |
| ATOM | 27 | N   | TYR | 52 | -7.441  | 18.933 | -7.396  | 1.00 | -0.26 |
| ATOM | 28 | CA  | TYR | 52 | -8.270  | 19.893 | -6.664  | 1.00 | 0.14  |
| ATOM | 29 | C   | TYR | 52 | -9.683  | 19.360 | -6.516  | 1.00 | 0.21  |
| ATOM | 30 | O   | TYR | 52 | -10.111 | 19.108 | -5.402  | 1.00 | -0.39 |
| ATOM | 31 | CB  | TYR | 52 | -8.194  | 21.263 | -7.391  | 1.00 | 0.02  |
| ATOM | 32 | CG  | TYR | 52 | -6.719  | 21.649 | -7.593  | 1.00 | -0.05 |
| ATOM | 33 | CD1 | TYR | 52 | -6.033  | 22.356 | -6.600  | 1.00 | -0.07 |
| ATOM | 34 | CD2 | TYR | 52 | -6.040  | 21.286 | -8.763  | 1.00 | -0.07 |
| ATOM | 35 | CE1 | TYR | 52 | -4.684  | 22.683 | -6.767  | 1.00 | -0.04 |
| ATOM | 36 | CE2 | TYR | 52 | -4.690  | 21.614 | -8.931  | 1.00 | -0.04 |
| ATOM | 37 | CZ  | TYR | 52 | -4.009  | 22.321 | -7.938  | 1.00 | 0.08  |
| ATOM | 38 | OH  | TYR | 52 | -2.666  | 22.665 | -8.121  | 1.00 | -0.34 |
| ATOM | 39 | H   | TYR | 52 | -7.853  | 18.427 | -8.152  | 1.00 | 0.19  |
| ATOM | 40 | HA  | TYR | 52 | -7.891  | 20.037 | -5.637  | 1.00 | 0.08  |
| ATOM | 41 | HB1 | TYR | 52 | -8.719  | 22.032 | -6.802  | 1.00 | 0.05  |
| ATOM | 42 | HB2 | TYR | 52 | -8.680  | 21.215 | -8.376  | 1.00 | 0.05  |
| ATOM | 43 | HD1 | TYR | 52 | -6.545  | 22.649 | -5.689  | 1.00 | 0.05  |
| ATOM | 44 | HD2 | TYR | 52 | -6.556  | 20.741 | -9.547  | 1.00 | 0.05  |
| ATOM | 45 | HE1 | TYR | 52 | -4.159  | 23.218 | -5.983  | 1.00 | 0.05  |
| ATOM | 46 | HE2 | TYR | 52 | -4.167  | 21.322 | -9.836  | 1.00 | 0.05  |
| ATOM | 47 | HH  | TYR | 52 | -2.552  | 23.589 | -7.917  | 1.00 | 0.25  |
| ATOM | 48 | N   | TYR | 53 | -10.445 | 19.142 | -7.611  | 1.00 | -0.26 |
| ATOM | 49 | CA  | TYR | 53 | -11.756 | 18.511 | -7.452  | 1.00 | 0.14  |
| ATOM | 50 | C   | TYR | 53 | -11.564 | 17.045 | -7.133  | 1.00 | 0.21  |
| ATOM | 51 | O   | TYR | 53 | -12.222 | 16.533 | -6.243  | 1.00 | -0.39 |
| ATOM | 52 | CB  | TYR | 53 | -12.620 | 18.636 | -8.736  | 1.00 | 0.02  |
| ATOM | 53 | CG  | TYR | 53 | -12.745 | 20.113 | -9.134  | 1.00 | -0.05 |
| ATOM | 54 | CD1 | TYR | 53 | -13.591 | 20.961 | -8.410  | 1.00 | -0.07 |
| ATOM | 55 | CD2 | TYR | 53 | -12.020 | 20.631 | -10.214 | 1.00 | -0.07 |
| ATOM | 56 | CE1 | TYR | 53 | -13.696 | 22.314 | -8.746  | 1.00 | -0.04 |
| ATOM | 57 | CE2 | TYR | 53 | -12.124 | 21.983 | -10.548 | 1.00 | -0.04 |
| ATOM | 58 | CZ  | TYR | 53 | -12.959 | 22.833 | -9.817  | 1.00 | 0.08  |
| ATOM | 59 | OH  | TYR | 53 | -13.038 | 24.182 | -10.174 | 1.00 | -0.34 |
| ATOM | 60 | H   | TYR | 53 | -10.116 | 19.341 | -8.533  | 1.00 | 0.19  |
| ATOM | 61 | HA  | TYR | 53 | -12.302 | 18.991 | -6.622  | 1.00 | 0.08  |
| ATOM | 62 | HB1 | TYR | 53 | -13.624 | 18.219 | -8.554  | 1.00 | 0.05  |
| ATOM | 63 | HB2 | TYR | 53 | -12.164 | 18.057 | -9.554  | 1.00 | 0.05  |
| ATOM | 64 | HD1 | TYR | 53 | -14.172 | 20.570 | -7.581  | 1.00 | 0.05  |
| ATOM | 65 | HD2 | TYR | 53 | -11.371 | 19.989 | -10.801 | 1.00 | 0.05  |
| ATOM | 66 | HE1 | TYR | 53 | -14.354 | 22.955 | -8.168  | 1.00 | 0.05  |
| ATOM | 67 | HE2 | TYR | 53 | -11.556 | 22.384 | -11.381 | 1.00 | 0.05  |

|      |     |      |     |    |         |        |         |      |       |
|------|-----|------|-----|----|---------|--------|---------|------|-------|
| ATOM | 68  | HH   | TYR | 53 | -13.654 | 24.690 | -9.657  | 1.00 | 0.25  |
| ATOM | 69  | N    | LEU | 54 | -10.666 | 16.336 | -7.851  | 1.00 | -0.26 |
| ATOM | 70  | CA   | LEU | 54 | -10.492 | 14.906 | -7.593  | 1.00 | 0.13  |
| ATOM | 71  | C    | LEU | 54 | -10.227 | 14.581 | -6.129  | 1.00 | 0.21  |
| ATOM | 72  | O    | LEU | 54 | -10.982 | 13.780 | -5.596  | 1.00 | -0.39 |
| ATOM | 73  | CB   | LEU | 54 | -9.420  | 14.276 | -8.529  | 1.00 | -0.01 |
| ATOM | 74  | CG   | LEU | 54 | -9.807  | 14.223 | -10.041 | 1.00 | -0.04 |
| ATOM | 75  | CD1  | LEU | 54 | -8.581  | 13.770 | -10.883 | 1.00 | -0.06 |
| ATOM | 76  | CD2  | LEU | 54 | -10.999 | 13.263 | -10.328 | 1.00 | -0.06 |
| ATOM | 77  | H    | LEU | 54 | -10.120 | 16.772 | -8.567  | 1.00 | 0.19  |
| ATOM | 78  | HA   | LEU | 54 | -11.455 | 14.427 | -7.817  | 1.00 | 0.08  |
| ATOM | 79  | HB2  | LEU | 54 | -9.206  | 13.258 | -8.184  | 1.00 | 0.03  |
| ATOM | 80  | HB1  | LEU | 54 | -8.492  | 14.854 | -8.424  | 1.00 | 0.03  |
| ATOM | 81  | HG   | LEU | 54 | -10.084 | 15.233 | -10.389 | 1.00 | 0.03  |
| ATOM | 82  | HD13 | LEU | 54 | -7.709  | 14.417 | -10.695 | 1.00 | 0.02  |
| ATOM | 83  | HD12 | LEU | 54 | -8.809  | 13.813 | -11.959 | 1.00 | 0.02  |
| ATOM | 84  | HD11 | LEU | 54 | -8.314  | 12.734 | -10.628 | 1.00 | 0.02  |
| ATOM | 85  | HD23 | LEU | 54 | -10.800 | 12.266 | -9.905  | 1.00 | 0.02  |
| ATOM | 86  | HD22 | LEU | 54 | -11.146 | 13.153 | -11.413 | 1.00 | 0.02  |
| ATOM | 87  | HD21 | LEU | 54 | -11.944 | 13.640 | -9.913  | 1.00 | 0.02  |
| ATOM | 88  | N    | PRO | 55 | -9.223  | 15.119 | -5.388  | 1.00 | -0.25 |
| ATOM | 89  | CA   | PRO | 55 | -9.112  | 14.762 | -3.982  | 1.00 | 0.13  |
| ATOM | 90  | C    | PRO | 55 | -10.338 | 15.194 | -3.212  | 1.00 | 0.20  |
| ATOM | 91  | O    | PRO | 55 | -10.698 | 14.495 | -2.279  | 1.00 | -0.39 |
| ATOM | 92  | CB   | PRO | 55 | -7.827  | 15.529 | -3.580  | 1.00 | -0.01 |
| ATOM | 93  | CG   | PRO | 55 | -7.737  | 16.691 | -4.596  | 1.00 | -0.03 |
| ATOM | 94  | CD   | PRO | 55 | -8.245  | 16.057 | -5.913  | 1.00 | 0.04  |
| ATOM | 95  | HA   | PRO | 55 | -8.972  | 13.678 | -3.856  | 1.00 | 0.08  |
| ATOM | 96  | HB2  | PRO | 55 | -6.951  | 14.876 | -3.733  | 1.00 | 0.03  |
| ATOM | 97  | HB1  | PRO | 55 | -7.838  | 15.865 | -2.531  | 1.00 | 0.03  |
| ATOM | 98  | HG1  | PRO | 55 | -8.415  | 17.497 | -4.274  | 1.00 | 0.03  |
| ATOM | 99  | HG2  | PRO | 55 | -6.722  | 17.111 | -4.688  | 1.00 | 0.03  |
| ATOM | 100 | HD1  | PRO | 55 | -8.662  | 16.819 | -6.576  | 1.00 | 0.05  |
| ATOM | 101 | HD2  | PRO | 55 | -7.426  | 15.514 | -6.410  | 1.00 | 0.05  |
| ATOM | 102 | N    | ALA | 56 | -11.024 | 16.306 | -3.557  | 1.00 | -0.26 |
| ATOM | 103 | CA   | ALA | 56 | -12.253 | 16.625 | -2.832  | 1.00 | 0.13  |
| ATOM | 104 | C    | ALA | 56 | -13.260 | 15.525 | -3.082  | 1.00 | 0.20  |
| ATOM | 105 | O    | ALA | 56 | -13.872 | 15.034 | -2.146  | 1.00 | -0.39 |
| ATOM | 106 | CB   | ALA | 56 | -12.848 | 17.992 | -3.257  | 1.00 | -0.02 |
| ATOM | 107 | H    | ALA | 56 | -10.761 | 16.872 | -4.342  | 1.00 | 0.19  |
| ATOM | 108 | HA   | ALA | 56 | -12.035 | 16.671 | -1.752  | 1.00 | 0.08  |
| ATOM | 109 | HB3  | ALA | 56 | -13.130 | 17.985 | -4.319  | 1.00 | 0.03  |
| ATOM | 110 | HB2  | ALA | 56 | -12.107 | 18.790 | -3.096  | 1.00 | 0.03  |
| ATOM | 111 | HB1  | ALA | 56 | -13.746 | 18.215 | -2.660  | 1.00 | 0.03  |
| ATOM | 112 | N    | VAL | 57 | -13.443 | 15.107 | -4.353  | 1.00 | -0.26 |
| ATOM | 113 | CA   | VAL | 57 | -14.382 | 14.024 | -4.629  | 1.00 | 0.13  |
| ATOM | 114 | C    | VAL | 57 | -13.932 | 12.797 | -3.873  | 1.00 | 0.20  |
| ATOM | 115 | O    | VAL | 57 | -14.745 | 12.191 | -3.193  | 1.00 | -0.39 |
| ATOM | 116 | CB   | VAL | 57 | -14.517 | 13.708 | -6.150  | 1.00 | -0.01 |
| ATOM | 117 | CG1  | VAL | 57 | -15.310 | 12.392 | -6.389  | 1.00 | -0.06 |
| ATOM | 118 | CG2  | VAL | 57 | -15.213 | 14.881 | -6.897  | 1.00 | -0.06 |
| ATOM | 119 | H    | VAL | 57 | -12.903 | 15.498 | -5.105  | 1.00 | 0.19  |
| ATOM | 120 | HA   | VAL | 57 | -15.375 | 14.309 | -4.245  | 1.00 | 0.08  |
| ATOM | 121 | HB   | VAL | 57 | -13.507 | 13.569 | -6.570  | 1.00 | 0.03  |
| ATOM | 122 | HG13 | VAL | 57 | -14.771 | 11.522 | -5.984  | 1.00 | 0.02  |
| ATOM | 123 | HG12 | VAL | 57 | -15.454 | 12.221 | -7.468  | 1.00 | 0.02  |
| ATOM | 124 | HG11 | VAL | 57 | -16.299 | 12.448 | -5.909  | 1.00 | 0.02  |
| ATOM | 125 | HG23 | VAL | 57 | -16.246 | 15.004 | -6.538  | 1.00 | 0.02  |

|      |     |         |    |         |        |        |      |       |
|------|-----|---------|----|---------|--------|--------|------|-------|
| ATOM | 126 | HG22VAL | 57 | -15.242 | 14.681 | -7.980 | 1.00 | 0.02  |
| ATOM | 127 | HG21VAL | 57 | -14.680 | 15.831 | -6.744 | 1.00 | 0.02  |
| ATOM | 128 | N TYR   | 58 | -12.648 | 12.387 | -3.961 | 1.00 | -0.26 |
| ATOM | 129 | CA TYR  | 58 | -12.253 | 11.195 | -3.217 | 1.00 | 0.14  |
| ATOM | 130 | C TYR   | 58 | -12.466 | 11.395 | -1.734 | 1.00 | 0.21  |
| ATOM | 131 | O TYR   | 58 | -12.921 | 10.470 | -1.081 | 1.00 | -0.39 |
| ATOM | 132 | CB TYR  | 58 | -10.799 | 10.735 | -3.483 | 1.00 | 0.02  |
| ATOM | 133 | CG TYR  | 58 | -10.666 | 10.214 | -4.920 | 1.00 | -0.05 |
| ATOM | 134 | CD1 TYR | 58 | -11.344 | 9.050  | -5.307 | 1.00 | -0.07 |
| ATOM | 135 | CD2 TYR | 58 | -9.874  | 10.886 | -5.856 | 1.00 | -0.07 |
| ATOM | 136 | CE1 TYR | 58 | -11.347 | 8.643  | -6.644 | 1.00 | -0.04 |
| ATOM | 137 | CE2 TYR | 58 | -9.856  | 10.458 | -7.185 | 1.00 | -0.04 |
| ATOM | 138 | CZ TYR  | 58 | -10.637 | 9.379  | -7.598 | 1.00 | 0.08  |
| ATOM | 139 | OH TYR  | 58 | -10.696 | 9.058  | -8.954 | 1.00 | -0.34 |
| ATOM | 140 | H TYR   | 58 | -11.970 | 12.887 | -4.512 | 1.00 | 0.19  |
| ATOM | 141 | HA TYR  | 58 | -12.924 | 10.384 | -3.533 | 1.00 | 0.08  |
| ATOM | 142 | HB1 TYR | 58 | -10.548 | 9.903  | -2.813 | 1.00 | 0.05  |
| ATOM | 143 | HB2 TYR | 58 | -10.108 | 11.562 | -3.267 | 1.00 | 0.05  |
| ATOM | 144 | HD1 TYR | 58 | -11.873 | 8.452  | -4.572 | 1.00 | 0.05  |
| ATOM | 145 | HD2 TYR | 58 | -9.273  | 11.739 | -5.562 | 1.00 | 0.05  |
| ATOM | 146 | HE1 TYR | 58 | -11.899 | 7.755  | -6.935 | 1.00 | 0.05  |
| ATOM | 147 | HE2 TYR | 58 | -9.235  | 10.966 | -7.907 | 1.00 | 0.05  |
| ATOM | 148 | HH TYR  | 58 | -11.540 | 8.701  | -9.203 | 1.00 | 0.25  |
| ATOM | 149 | N ILE   | 59 | -12.168 | 12.577 | -1.158 | 1.00 | -0.26 |
| ATOM | 150 | CA ILE  | 59 | -12.471 | 12.774 | 0.261  | 1.00 | 0.13  |
| ATOM | 151 | C ILE   | 59 | -13.960 | 12.591 | 0.472  | 1.00 | 0.20  |
| ATOM | 152 | O ILE   | 59 | -14.351 | 11.922 | 1.418  | 1.00 | -0.39 |
| ATOM | 153 | CB ILE  | 59 | -11.961 | 14.149 | 0.790  | 1.00 | 0.00  |
| ATOM | 154 | CG1 ILE | 59 | -10.400 | 14.153 | 0.853  | 1.00 | -0.05 |
| ATOM | 155 | CG2 ILE | 59 | -12.574 | 14.473 | 2.184  | 1.00 | -0.06 |
| ATOM | 156 | CD1 ILE | 59 | -9.789  | 15.580 | 0.850  | 1.00 | -0.06 |
| ATOM | 157 | H ILE   | 59 | -11.796 | 13.336 | -1.702 | 1.00 | 0.19  |
| ATOM | 158 | HA ILE  | 59 | -11.963 | 11.989 | 0.842  | 1.00 | 0.08  |
| ATOM | 159 | HB ILE  | 59 | -12.307 | 14.923 | 0.086  | 1.00 | 0.03  |
| ATOM | 160 | HG12ILE | 59 | -9.984  | 13.621 | -0.018 | 1.00 | 0.03  |
| ATOM | 161 | HG11ILE | 59 | -10.064 | 13.610 | 1.752  | 1.00 | 0.03  |
| ATOM | 162 | HG23ILE | 59 | -13.668 | 14.569 | 2.115  | 1.00 | 0.02  |
| ATOM | 163 | HG22ILE | 59 | -12.190 | 15.424 | 2.580  | 1.00 | 0.02  |
| ATOM | 164 | HG21ILE | 59 | -12.338 | 13.673 | 2.903  | 1.00 | 0.02  |
| ATOM | 165 | HD13ILE | 59 | -10.097 | 16.126 | -0.055 | 1.00 | 0.02  |
| ATOM | 166 | HD12ILE | 59 | -8.689  | 15.516 | 0.852  | 1.00 | 0.02  |
| ATOM | 167 | HD11ILE | 59 | -10.098 | 16.160 | 1.731  | 1.00 | 0.02  |
| ATOM | 168 | N LEU   | 60 | -14.831 | 13.160 | -0.389 | 1.00 | -0.26 |
| ATOM | 169 | CA LEU  | 60 | -16.262 | 12.910 | -0.213 | 1.00 | 0.13  |
| ATOM | 170 | C LEU   | 60 | -16.543 | 11.427 | -0.346 | 1.00 | 0.20  |
| ATOM | 171 | O LEU   | 60 | -17.285 | 10.898 | 0.466  | 1.00 | -0.39 |
| ATOM | 172 | CB LEU  | 60 | -17.160 | 13.688 | -1.216 | 1.00 | -0.01 |
| ATOM | 173 | CG LEU  | 60 | -17.126 | 15.240 | -1.054 | 1.00 | -0.04 |
| ATOM | 174 | CD1 LEU | 60 | -17.902 | 15.901 | -2.228 | 1.00 | -0.06 |
| ATOM | 175 | CD2 LEU | 60 | -17.726 | 15.714 | 0.300  | 1.00 | -0.06 |
| ATOM | 176 | H LEU   | 60 | -14.508 | 13.707 | -1.171 | 1.00 | 0.19  |
| ATOM | 177 | HA LEU  | 60 | -16.545 | 13.185 | 0.814  | 1.00 | 0.08  |
| ATOM | 178 | HB2 LEU | 60 | -18.202 | 13.349 | -1.096 | 1.00 | 0.03  |
| ATOM | 179 | HB1 LEU | 60 | -16.837 | 13.415 | -2.232 | 1.00 | 0.03  |
| ATOM | 180 | HG LEU  | 60 | -16.084 | 15.596 | -1.103 | 1.00 | 0.03  |
| ATOM | 181 | HD13LEU | 60 | -17.463 | 15.613 | -3.196 | 1.00 | 0.02  |
| ATOM | 182 | HD12LEU | 60 | -17.861 | 16.999 | -2.152 | 1.00 | 0.02  |
| ATOM | 183 | HD11LEU | 60 | -18.957 | 15.588 | -2.214 | 1.00 | 0.02  |

|      |     |         |    |         |        |        |      |       |
|------|-----|---------|----|---------|--------|--------|------|-------|
| ATOM | 184 | HD23LEU | 60 | -18.741 | 15.309 | 0.435  | 1.00 | 0.02  |
| ATOM | 185 | HD22LEU | 60 | -17.788 | 16.814 | 0.326  | 1.00 | 0.02  |
| ATOM | 186 | HD21LEU | 60 | -17.105 | 15.405 | 1.153  | 1.00 | 0.02  |
| ATOM | 187 | N VAL   | 61 | -15.973 | 10.713 | -1.340 | 1.00 | -0.26 |
| ATOM | 188 | CA VAL  | 61 | -16.199 | 9.266  | -1.411 | 1.00 | 0.13  |
| ATOM | 189 | C VAL   | 61 | -15.748 | 8.637  | -0.111 | 1.00 | 0.20  |
| ATOM | 190 | O VAL   | 61 | -16.455 | 7.808  | 0.440  | 1.00 | -0.39 |
| ATOM | 191 | CB VAL  | 61 | -15.433 | 8.579  | -2.582 | 1.00 | -0.01 |
| ATOM | 192 | CG1 VAL | 61 | -15.463 | 7.027  | -2.477 | 1.00 | -0.06 |
| ATOM | 193 | CG2 VAL | 61 | -16.004 | 9.017  | -3.961 | 1.00 | -0.06 |
| ATOM | 194 | H VAL   | 61 | -15.358 | 11.162 | -1.995 | 1.00 | 0.19  |
| ATOM | 195 | HA VAL  | 61 | -17.275 | 9.073  | -1.536 | 1.00 | 0.08  |
| ATOM | 196 | HB VAL  | 61 | -14.376 | 8.873  | -2.516 | 1.00 | 0.03  |
| ATOM | 197 | HG13VAL | 61 | -14.972 | 6.666  | -1.561 | 1.00 | 0.02  |
| ATOM | 198 | HG12VAL | 61 | -14.922 | 6.588  | -3.330 | 1.00 | 0.02  |
| ATOM | 199 | HG11VAL | 61 | -16.502 | 6.666  | -2.484 | 1.00 | 0.02  |
| ATOM | 200 | HG23VAL | 61 | -17.040 | 8.663  | -4.073 | 1.00 | 0.02  |
| ATOM | 201 | HG22VAL | 61 | -15.400 | 8.591  | -4.778 | 1.00 | 0.02  |
| ATOM | 202 | HG21VAL | 61 | -16.001 | 10.110 | -4.071 | 1.00 | 0.02  |
| ATOM | 203 | N PHE   | 62 | -14.555 | 9.010  | 0.392  | 1.00 | -0.26 |
| ATOM | 204 | CA PHE  | 62 | -14.062 | 8.410  | 1.627  | 1.00 | 0.14  |
| ATOM | 205 | C PHE   | 62 | -15.042 | 8.677  | 2.750  | 1.00 | 0.21  |
| ATOM | 206 | O PHE   | 62 | -15.431 | 7.760  | 3.458  | 1.00 | -0.39 |
| ATOM | 207 | CB PHE  | 62 | -12.671 | 8.999  | 1.996  | 1.00 | 0.02  |
| ATOM | 208 | CG PHE  | 62 | -11.552 | 8.847  | 0.947  | 1.00 | -0.04 |
| ATOM | 209 | CD1 PHE | 62 | -11.646 | 7.992  | -0.160 | 1.00 | -0.06 |
| ATOM | 210 | CD2 PHE | 62 | -10.382 | 9.601  | 1.109  | 1.00 | -0.06 |
| ATOM | 211 | CE1 PHE | 62 | -10.578 | 7.870  | -1.053 | 1.00 | -0.07 |
| ATOM | 212 | CE2 PHE | 62 | -9.296  | 9.448  | 0.242  | 1.00 | -0.07 |
| ATOM | 213 | CZ PHE  | 62 | -9.383  | 8.557  | -0.829 | 1.00 | -0.07 |
| ATOM | 214 | H PHE   | 62 | -13.999 | 9.708  | -0.071 | 1.00 | 0.19  |
| ATOM | 215 | HA PHE  | 62 | -13.987 | 7.316  | 1.513  | 1.00 | 0.08  |
| ATOM | 216 | HB2 PHE | 62 | -12.317 | 8.513  | 2.909  | 1.00 | 0.05  |
| ATOM | 217 | HB1 PHE | 62 | -12.787 | 10.068 | 2.219  | 1.00 | 0.05  |
| ATOM | 218 | HD1 PHE | 62 | -12.542 | 7.414  | -0.351 | 1.00 | 0.06  |
| ATOM | 219 | HD2 PHE | 62 | -10.303 | 10.321 | 1.916  | 1.00 | 0.06  |
| ATOM | 220 | HE1 PHE | 62 | -10.677 | 7.243  | -1.931 | 1.00 | 0.06  |
| ATOM | 221 | HE2 PHE | 62 | -8.388  | 10.021 | 0.401  | 1.00 | 0.06  |
| ATOM | 222 | HZ PHE  | 62 | -8.533  | 8.405  | -1.488 | 1.00 | 0.06  |
| ATOM | 223 | N ILE   | 63 | -15.469 | 9.943  | 2.933  | 1.00 | -0.26 |
| ATOM | 224 | CA ILE  | 63 | -16.411 | 10.231 | 4.016  | 1.00 | 0.13  |
| ATOM | 225 | C ILE   | 63 | -17.692 | 9.469  | 3.756  | 1.00 | 0.20  |
| ATOM | 226 | O ILE   | 63 | -18.215 | 8.845  | 4.667  | 1.00 | -0.39 |
| ATOM | 227 | CB ILE  | 63 | -16.666 | 11.762 | 4.172  | 1.00 | 0.00  |
| ATOM | 228 | CG1 ILE | 63 | -15.366 | 12.468 | 4.675  | 1.00 | -0.05 |
| ATOM | 229 | CG2 ILE | 63 | -17.867 | 12.030 | 5.125  | 1.00 | -0.06 |
| ATOM | 230 | CD1 ILE | 63 | -15.434 | 14.018 | 4.625  | 1.00 | -0.06 |
| ATOM | 231 | H ILE   | 63 | -15.189 | 10.675 | 2.301  | 1.00 | 0.19  |
| ATOM | 232 | HA ILE  | 63 | -15.994 | 9.853  | 4.964  | 1.00 | 0.08  |
| ATOM | 233 | HB ILE  | 63 | -16.934 | 12.162 | 3.179  | 1.00 | 0.03  |
| ATOM | 234 | HG12ILE | 63 | -14.513 | 12.163 | 4.048  | 1.00 | 0.03  |
| ATOM | 235 | HG11ILE | 63 | -15.145 | 12.149 | 5.707  | 1.00 | 0.03  |
| ATOM | 236 | HG23ILE | 63 | -18.791 | 11.589 | 4.723  | 1.00 | 0.02  |
| ATOM | 237 | HG22ILE | 63 | -18.058 | 13.106 | 5.241  | 1.00 | 0.02  |
| ATOM | 238 | HG21ILE | 63 | -17.672 | 11.596 | 6.117  | 1.00 | 0.02  |
| ATOM | 239 | HD13ILE | 63 | -15.752 | 14.357 | 3.627  | 1.00 | 0.02  |
| ATOM | 240 | HD12ILE | 63 | -14.439 | 14.443 | 4.836  | 1.00 | 0.02  |
| ATOM | 241 | HD11ILE | 63 | -16.131 | 14.420 | 5.375  | 1.00 | 0.02  |

|      |     |      |     |    |         |        |        |      |       |
|------|-----|------|-----|----|---------|--------|--------|------|-------|
| ATOM | 242 | N    | ILE | 64 | -18.223 | 9.495  | 2.517  | 1.00 | -0.26 |
| ATOM | 243 | CA   | ILE | 64 | -19.463 | 8.770  | 2.241  | 1.00 | 0.13  |
| ATOM | 244 | C    | ILE | 64 | -19.261 | 7.304  | 2.555  | 1.00 | 0.20  |
| ATOM | 245 | O    | ILE | 64 | -20.138 | 6.705  | 3.157  | 1.00 | -0.39 |
| ATOM | 246 | CB   | ILE | 64 | -19.962 | 8.994  | 0.781  | 1.00 | 0.00  |
| ATOM | 247 | CG1  | ILE | 64 | -20.424 | 10.475 | 0.593  | 1.00 | -0.05 |
| ATOM | 248 | CG2  | ILE | 64 | -21.108 | 8.002  | 0.427  | 1.00 | -0.06 |
| ATOM | 249 | CD1  | ILE | 64 | -20.467 | 10.921 | -0.894 | 1.00 | -0.06 |
| ATOM | 250 | HB   | ILE | 64 | -19.115 | 8.781  | 0.110  | 1.00 | 0.03  |
| ATOM | 251 | H    | ILE | 64 | -17.752 | 9.976  | 1.772  | 1.00 | 0.19  |
| ATOM | 252 | HA   | ILE | 64 | -20.242 | 9.146  | 2.921  | 1.00 | 0.08  |
| ATOM | 253 | HG23 | ILE | 64 | -20.758 | 6.959  | 0.473  | 1.00 | 0.02  |
| ATOM | 254 | HG22 | ILE | 64 | -21.485 | 8.172  | -0.592 | 1.00 | 0.02  |
| ATOM | 255 | HG21 | ILE | 64 | -21.944 | 8.119  | 1.133  | 1.00 | 0.02  |
| ATOM | 256 | HG12 | ILE | 64 | -19.739 | 11.162 | 1.113  | 1.00 | 0.03  |
| ATOM | 257 | HG11 | ILE | 64 | -21.420 | 10.611 | 1.046  | 1.00 | 0.03  |
| ATOM | 258 | HD13 | ILE | 64 | -19.477 | 10.796 | -1.360 | 1.00 | 0.02  |
| ATOM | 259 | HD12 | ILE | 64 | -20.744 | 11.986 | -0.956 | 1.00 | 0.02  |
| ATOM | 260 | HD11 | ILE | 64 | -21.204 | 10.346 | -1.472 | 1.00 | 0.02  |
| ATOM | 261 | N    | GLY | 65 | -18.122 | 6.685  | 2.185  | 1.00 | -0.27 |
| ATOM | 262 | CA   | GLY | 65 | -17.901 | 5.298  | 2.592  | 1.00 | 0.12  |
| ATOM | 263 | C    | GLY | 65 | -18.004 | 5.174  | 4.094  | 1.00 | 0.20  |
| ATOM | 264 | O    | GLY | 65 | -18.624 | 4.245  | 4.588  | 1.00 | -0.39 |
| ATOM | 265 | H    | GLY | 65 | -17.404 | 7.170  | 1.673  | 1.00 | 0.19  |
| ATOM | 266 | HA1  | GLY | 65 | -18.651 | 4.646  | 2.118  | 1.00 | 0.08  |
| ATOM | 267 | HA2  | GLY | 65 | -16.899 | 4.946  | 2.299  | 1.00 | 0.08  |
| ATOM | 268 | N    | PHE | 66 | -17.405 | 6.113  | 4.854  | 1.00 | -0.26 |
| ATOM | 269 | CA   | PHE | 66 | -17.503 | 6.023  | 6.312  | 1.00 | 0.14  |
| ATOM | 270 | C    | PHE | 66 | -18.918 | 6.281  | 6.771  | 1.00 | 0.21  |
| ATOM | 271 | O    | PHE | 66 | -19.336 | 5.675  | 7.746  | 1.00 | -0.39 |
| ATOM | 272 | CB   | PHE | 66 | -16.508 | 6.987  | 7.004  | 1.00 | 0.02  |
| ATOM | 273 | CG   | PHE | 66 | -15.110 | 6.926  | 6.369  | 1.00 | -0.04 |
| ATOM | 274 | CD1  | PHE | 66 | -14.661 | 5.814  | 5.643  | 1.00 | -0.06 |
| ATOM | 275 | CD2  | PHE | 66 | -14.266 | 8.035  | 6.500  | 1.00 | -0.06 |
| ATOM | 276 | CE1  | PHE | 66 | -13.480 | 5.888  | 4.904  | 1.00 | -0.07 |
| ATOM | 277 | CE2  | PHE | 66 | -13.028 | 8.064  | 5.855  | 1.00 | -0.07 |
| ATOM | 278 | CZ   | PHE | 66 | -12.636 | 6.988  | 5.054  | 1.00 | -0.07 |
| ATOM | 279 | H    | PHE | 66 | -16.917 | 6.887  | 4.430  | 1.00 | 0.19  |
| ATOM | 280 | HA   | PHE | 66 | -17.263 | 4.996  | 6.631  | 1.00 | 0.08  |
| ATOM | 281 | HB2  | PHE | 66 | -16.436 | 6.764  | 8.079  | 1.00 | 0.05  |
| ATOM | 282 | HB1  | PHE | 66 | -16.901 | 8.009  | 6.885  | 1.00 | 0.05  |
| ATOM | 283 | HD1  | PHE | 66 | -15.210 | 4.880  | 5.624  | 1.00 | 0.06  |
| ATOM | 284 | HD2  | PHE | 66 | -14.575 | 8.881  | 7.103  | 1.00 | 0.06  |
| ATOM | 285 | HE1  | PHE | 66 | -13.220 | 5.090  | 4.215  | 1.00 | 0.06  |
| ATOM | 286 | HE2  | PHE | 66 | -12.382 | 8.926  | 5.980  | 1.00 | 0.06  |
| ATOM | 287 | HZ   | PHE | 66 | -11.681 | 6.985  | 4.546  | 1.00 | 0.06  |
| ATOM | 288 | N    | LEU | 67 | -19.696 | 7.149  | 6.089  | 1.00 | -0.26 |
| ATOM | 289 | CA   | LEU | 67 | -21.126 | 7.194  | 6.389  | 1.00 | 0.13  |
| ATOM | 290 | C    | LEU | 67 | -21.703 | 5.833  | 6.065  | 1.00 | 0.20  |
| ATOM | 291 | O    | LEU | 67 | -22.546 | 5.353  | 6.804  | 1.00 | -0.39 |
| ATOM | 292 | CB   | LEU | 67 | -21.924 | 8.281  | 5.618  | 1.00 | -0.01 |
| ATOM | 293 | CG   | LEU | 67 | -21.434 | 9.742  | 5.859  | 1.00 | -0.04 |
| ATOM | 294 | CD1  | LEU | 67 | -22.288 | 10.728 | 5.013  | 1.00 | -0.06 |
| ATOM | 295 | CD2  | LEU | 67 | -21.484 | 10.150 | 7.357  | 1.00 | -0.06 |
| ATOM | 296 | H    | LEU | 67 | -19.330 | 7.677  | 5.317  | 1.00 | 0.19  |
| ATOM | 297 | HA   | LEU | 67 | -21.259 | 7.347  | 7.469  | 1.00 | 0.08  |
| ATOM | 298 | HB2  | LEU | 67 | -22.982 | 8.208  | 5.917  | 1.00 | 0.03  |
| ATOM | 299 | HB1  | LEU | 67 | -21.866 | 8.050  | 4.543  | 1.00 | 0.03  |

|      |     |      |     |    |         |        |        |      |       |
|------|-----|------|-----|----|---------|--------|--------|------|-------|
| ATOM | 300 | HG   | LEU | 67 | -20.392 | 9.837  | 5.520  | 1.00 | 0.03  |
| ATOM | 301 | HD13 | LEU | 67 | -22.249 | 10.464 | 3.945  | 1.00 | 0.02  |
| ATOM | 302 | HD12 | LEU | 67 | -21.913 | 11.758 | 5.122  | 1.00 | 0.02  |
| ATOM | 303 | HD11 | LEU | 67 | -23.339 | 10.703 | 5.340  | 1.00 | 0.02  |
| ATOM | 304 | HD23 | LEU | 67 | -22.489 | 9.974  | 7.771  | 1.00 | 0.02  |
| ATOM | 305 | HD22 | LEU | 67 | -21.242 | 11.219 | 7.470  | 1.00 | 0.02  |
| ATOM | 306 | HD21 | LEU | 67 | -20.749 | 9.585  | 7.951  | 1.00 | 0.02  |
| ATOM | 307 | N    | GLY | 68 | -21.264 | 5.168  | 4.976  | 1.00 | -0.27 |
| ATOM | 308 | CA   | GLY | 68 | -21.692 | 3.792  | 4.748  | 1.00 | 0.12  |
| ATOM | 309 | C    | GLY | 68 | -21.384 | 2.939  | 5.955  | 1.00 | 0.20  |
| ATOM | 310 | O    | GLY | 68 | -22.266 | 2.231  | 6.413  | 1.00 | -0.39 |
| ATOM | 311 | H    | GLY | 68 | -20.616 | 5.588  | 4.333  | 1.00 | 0.19  |
| ATOM | 312 | HA1  | GLY | 68 | -22.774 | 3.773  | 4.548  | 1.00 | 0.08  |
| ATOM | 313 | HA2  | GLY | 68 | -21.172 | 3.346  | 3.885  | 1.00 | 0.08  |
| ATOM | 314 | N    | ASN | 69 | -20.147 | 2.981  | 6.500  | 1.00 | -0.26 |
| ATOM | 315 | CA   | ASN | 69 | -19.886 | 2.225  | 7.726  | 1.00 | 0.15  |
| ATOM | 316 | C    | ASN | 69 | -20.806 | 2.696  | 8.832  | 1.00 | 0.21  |
| ATOM | 317 | O    | ASN | 69 | -21.463 | 1.875  | 9.447  | 1.00 | -0.39 |
| ATOM | 318 | CB   | ASN | 69 | -18.438 | 2.357  | 8.268  | 1.00 | 0.08  |
| ATOM | 319 | CG   | ASN | 69 | -17.429 | 1.713  | 7.355  | 1.00 | 0.18  |
| ATOM | 320 | OD1  | ASN | 69 | -16.701 | 2.422  | 6.679  | 1.00 | -0.40 |
| ATOM | 321 | ND2  | ASN | 69 | -17.350 | 0.370  | 7.317  | 1.00 | -0.30 |
| ATOM | 322 | H    | ASN | 69 | -19.420 | 3.537  | 6.080  | 1.00 | 0.19  |
| ATOM | 323 | HA   | ASN | 69 | -20.084 | 1.156  | 7.538  | 1.00 | 0.08  |
| ATOM | 324 | HB2  | ASN | 69 | -18.358 | 1.866  | 9.251  | 1.00 | 0.06  |
| ATOM | 325 | HB1  | ASN | 69 | -18.183 | 3.417  | 8.398  | 1.00 | 0.06  |
| ATOM | 326 | HD21 | ASN | 69 | -17.908 | -0.206 | 7.929  | 1.00 | 0.18  |
| ATOM | 327 | HD22 | ASN | 69 | -16.683 | -0.069 | 6.717  | 1.00 | 0.18  |
| ATOM | 328 | N    | SER | 70 | -20.886 | 4.006  | 9.146  | 1.00 | -0.26 |
| ATOM | 329 | CA   | SER | 70 | -21.700 | 4.403  | 10.297 | 1.00 | 0.15  |
| ATOM | 330 | C    | SER | 70 | -23.138 | 3.990  | 10.091 | 1.00 | 0.21  |
| ATOM | 331 | O    | SER | 70 | -23.734 | 3.418  | 10.990 | 1.00 | -0.39 |
| ATOM | 332 | CB   | SER | 70 | -21.661 | 5.926  | 10.586 | 1.00 | 0.08  |
| ATOM | 333 | OG   | SER | 70 | -22.416 | 6.646  | 9.594  | 1.00 | -0.39 |
| ATOM | 334 | H    | SER | 70 | -20.404 | 4.705  | 8.609  | 1.00 | 0.19  |
| ATOM | 335 | HA   | SER | 70 | -21.314 | 3.874  | 11.184 | 1.00 | 0.08  |
| ATOM | 336 | HB2  | SER | 70 | -20.613 | 6.270  | 10.605 | 1.00 | 0.06  |
| ATOM | 337 | HB1  | SER | 70 | -22.107 | 6.104  | 11.579 | 1.00 | 0.06  |
| ATOM | 338 | HG   | SER | 70 | -22.444 | 7.585  | 9.749  | 1.00 | 0.21  |
| ATOM | 339 | N    | VAL | 71 | -23.718 | 4.263  | 8.906  | 1.00 | -0.26 |
| ATOM | 340 | CA   | VAL | 71 | -25.087 | 3.827  | 8.640  | 1.00 | 0.13  |
| ATOM | 341 | C    | VAL | 71 | -25.154 | 2.322  | 8.747  | 1.00 | 0.20  |
| ATOM | 342 | O    | VAL | 71 | -26.025 | 1.815  | 9.437  | 1.00 | -0.39 |
| ATOM | 343 | CB   | VAL | 71 | -25.599 | 4.299  | 7.245  | 1.00 | -0.01 |
| ATOM | 344 | CG1  | VAL | 71 | -26.938 | 3.602  | 6.869  | 1.00 | -0.06 |
| ATOM | 345 | CG2  | VAL | 71 | -25.786 | 5.843  | 7.223  | 1.00 | -0.06 |
| ATOM | 346 | H    | VAL | 71 | -23.193 | 4.733  | 8.191  | 1.00 | 0.19  |
| ATOM | 347 | HA   | VAL | 71 | -25.752 | 4.247  | 9.411  | 1.00 | 0.08  |
| ATOM | 348 | HB   | VAL | 71 | -24.852 | 4.019  | 6.482  | 1.00 | 0.03  |
| ATOM | 349 | HG13 | VAL | 71 | -26.800 | 2.516  | 6.754  | 1.00 | 0.02  |
| ATOM | 350 | HG12 | VAL | 71 | -27.320 | 3.994  | 5.914  | 1.00 | 0.02  |
| ATOM | 351 | HG11 | VAL | 71 | -27.695 | 3.780  | 7.649  | 1.00 | 0.02  |
| ATOM | 352 | HG23 | VAL | 71 | -26.577 | 6.143  | 7.927  | 1.00 | 0.02  |
| ATOM | 353 | HG22 | VAL | 71 | -26.073 | 6.178  | 6.214  | 1.00 | 0.02  |
| ATOM | 354 | HG21 | VAL | 71 | -24.860 | 6.367  | 7.503  | 1.00 | 0.02  |
| ATOM | 355 | N    | ALA | 72 | -24.252 | 1.574  | 8.075  | 1.00 | -0.26 |
| ATOM | 356 | CA   | ALA | 72 | -24.308 | 0.118  | 8.184  | 1.00 | 0.13  |
| ATOM | 357 | C    | ALA | 72 | -24.237 | -0.291 | 9.634  | 1.00 | 0.20  |

|      |     |      |     |    |         |        |        |      |       |
|------|-----|------|-----|----|---------|--------|--------|------|-------|
| ATOM | 358 | O    | ALA | 72 | -24.958 | -1.181 | 10.057 | 1.00 | -0.39 |
| ATOM | 359 | CB   | ALA | 72 | -23.141 | -0.568 | 7.426  | 1.00 | -0.02 |
| ATOM | 360 | H    | ALA | 72 | -23.526 | 1.998  | 7.523  | 1.00 | 0.19  |
| ATOM | 361 | HA   | ALA | 72 | -25.272 | -0.226 | 7.780  | 1.00 | 0.08  |
| ATOM | 362 | HB3  | ALA | 72 | -22.177 | -0.269 | 7.864  | 1.00 | 0.03  |
| ATOM | 363 | HB2  | ALA | 72 | -23.148 | -0.282 | 6.363  | 1.00 | 0.03  |
| ATOM | 364 | HB1  | ALA | 72 | -23.230 | -1.662 | 7.496  | 1.00 | 0.03  |
| ATOM | 365 | N    | ILE | 73 | -23.371 | 0.354  | 10.437 | 1.00 | -0.26 |
| ATOM | 366 | CA   | ILE | 73 | -23.296 | -0.024 | 11.840 | 1.00 | 0.13  |
| ATOM | 367 | C    | ILE | 73 | -24.576 | 0.368  | 12.531 | 1.00 | 0.20  |
| ATOM | 368 | O    | ILE | 73 | -25.101 | -0.429 | 13.292 | 1.00 | -0.39 |
| ATOM | 369 | CB   | ILE | 73 | -22.072 | 0.593  | 12.565 | 1.00 | 0.00  |
| ATOM | 370 | CG1  | ILE | 73 | -20.760 | 0.034  | 11.941 | 1.00 | -0.05 |
| ATOM | 371 | CG2  | ILE | 73 | -22.155 | 0.260  | 14.080 | 1.00 | -0.06 |
| ATOM | 372 | CD1  | ILE | 73 | -19.535 | 0.924  | 12.272 | 1.00 | -0.06 |
| ATOM | 373 | H    | ILE | 73 | -22.804 | 1.110  | 10.093 | 1.00 | 0.19  |
| ATOM | 374 | HA   | ILE | 73 | -23.197 | -1.117 | 11.898 | 1.00 | 0.08  |
| ATOM | 375 | HB   | ILE | 73 | -22.113 | 1.688  | 12.435 | 1.00 | 0.03  |
| ATOM | 376 | HG12 | ILE | 73 | -20.827 | -0.032 | 10.845 | 1.00 | 0.03  |
| ATOM | 377 | HG11 | ILE | 73 | -20.611 | -0.992 | 12.309 | 1.00 | 0.03  |
| ATOM | 378 | HG23 | ILE | 73 | -22.952 | 0.840  | 14.572 | 1.00 | 0.02  |
| ATOM | 379 | HG22 | ILE | 73 | -21.209 | 0.488  | 14.582 | 1.00 | 0.02  |
| ATOM | 380 | HG21 | ILE | 73 | -22.365 | -0.810 | 14.220 | 1.00 | 0.02  |
| ATOM | 381 | HD13 | ILE | 73 | -19.731 | 1.977  | 12.021 | 1.00 | 0.02  |
| ATOM | 382 | HD12 | ILE | 73 | -18.658 | 0.605  | 11.692 | 1.00 | 0.02  |
| ATOM | 383 | HD11 | ILE | 73 | -19.289 | 0.849  | 13.337 | 1.00 | 0.02  |
| ATOM | 384 | N    | TRP | 74 | -25.125 | 1.578  | 12.301 | 1.00 | -0.26 |
| ATOM | 385 | CA   | TRP | 74 | -26.405 | 1.888  | 12.926 | 1.00 | 0.14  |
| ATOM | 386 | C    | TRP | 74 | -27.431 | 0.870  | 12.484 | 1.00 | 0.21  |
| ATOM | 387 | O    | TRP | 74 | -28.248 | 0.468  | 13.298 | 1.00 | -0.39 |
| ATOM | 388 | CB   | TRP | 74 | -26.884 | 3.339  | 12.668 | 1.00 | 0.00  |
| ATOM | 389 | CG   | TRP | 74 | -25.926 | 4.307  | 13.315 | 1.00 | -0.04 |
| ATOM | 390 | CD1  | TRP | 74 | -25.173 | 5.244  | 12.714 | 1.00 | 0.02  |
| ATOM | 391 | CD2  | TRP | 74 | -25.633 | 4.391  | 14.793 | 1.00 | -0.02 |
| ATOM | 392 | NE1  | TRP | 74 | -24.443 | 5.857  | 13.612 | 1.00 | -0.29 |
| ATOM | 393 | CE2  | TRP | 74 | -24.654 | 5.365  | 14.848 | 1.00 | 0.06  |
| ATOM | 394 | CE3  | TRP | 74 | -26.108 | 3.763  | 15.944 | 1.00 | -0.07 |
| ATOM | 395 | CZ2  | TRP | 74 | -24.033 | 5.717  | 16.045 | 1.00 | -0.04 |
| ATOM | 396 | CZ3  | TRP | 74 | -25.482 | 4.092  | 17.153 | 1.00 | -0.08 |
| ATOM | 397 | CH2  | TRP | 74 | -24.456 | 5.049  | 17.202 | 1.00 | -0.08 |
| ATOM | 398 | H    | TRP | 74 | -24.696 | 2.240  | 11.680 | 1.00 | 0.19  |
| ATOM | 399 | HA   | TRP | 74 | -26.271 | 1.758  | 14.008 | 1.00 | 0.08  |
| ATOM | 400 | HB2  | TRP | 74 | -27.876 | 3.489  | 13.119 | 1.00 | 0.04  |
| ATOM | 401 | HB1  | TRP | 74 | -26.963 | 3.512  | 11.584 | 1.00 | 0.04  |
| ATOM | 402 | HD1  | TRP | 74 | -25.169 | 5.457  | 11.645 | 1.00 | 0.08  |
| ATOM | 403 | HE1  | TRP | 74 | -23.786 | 6.622  | 13.403 | 1.00 | 0.22  |
| ATOM | 404 | HE3  | TRP | 74 | -26.930 | 3.057  | 15.909 | 1.00 | 0.05  |
| ATOM | 405 | HZ2  | TRP | 74 | -23.255 | 6.473  | 16.075 | 1.00 | 0.05  |
| ATOM | 406 | HZ3  | TRP | 74 | -25.798 | 3.599  | 18.067 | 1.00 | 0.05  |
| ATOM | 407 | HH2  | TRP | 74 | -23.982 | 5.277  | 18.152 | 1.00 | 0.05  |
| ATOM | 408 | N    | MET | 75 | -27.404 | 0.396  | 11.219 | 1.00 | -0.26 |
| ATOM | 409 | CA   | MET | 75 | -28.276 | -0.721 | 10.863 | 1.00 | 0.13  |
| ATOM | 410 | C    | MET | 75 | -27.905 | -1.919 | 11.710 | 1.00 | 0.20  |
| ATOM | 411 | O    | MET | 75 | -28.794 | -2.539 | 12.271 | 1.00 | -0.39 |
| ATOM | 412 | CB   | MET | 75 | -28.236 | -1.082 | 9.354  | 1.00 | 0.00  |
| ATOM | 413 | CG   | MET | 75 | -28.824 | 0.051  | 8.473  | 1.00 | 0.00  |
| ATOM | 414 | SD   | MET | 75 | -28.568 | -0.390 | 6.723  | 1.00 | -0.16 |
| ATOM | 415 | CE   | MET | 75 | -29.591 | 0.881  | 5.918  | 1.00 | -0.02 |

|      |     |      |     |    |         |        |        |      |       |
|------|-----|------|-----|----|---------|--------|--------|------|-------|
| ATOM | 416 | H    | MET | 75 | -26.742 | 0.743  | 10.548 | 1.00 | 0.19  |
| ATOM | 417 | HA   | MET | 75 | -29.313 | -0.450 | 11.108 | 1.00 | 0.08  |
| ATOM | 418 | HB2  | MET | 75 | -28.832 | -1.992 | 9.185  | 1.00 | 0.03  |
| ATOM | 419 | HB1  | MET | 75 | -27.202 | -1.297 | 9.051  | 1.00 | 0.03  |
| ATOM | 420 | HG2  | MET | 75 | -28.327 | 1.013  | 8.660  | 1.00 | 0.04  |
| ATOM | 421 | HG1  | MET | 75 | -29.901 | 0.166  | 8.672  | 1.00 | 0.04  |
| ATOM | 422 | LPD2 | MET | 75 | -29.458 | -1.147 | 7.117  | 1.00 | 0.00  |
| ATOM | 423 | LPD1 | MET | 75 | -28.350 | -1.134 | 7.115  | 1.00 | 0.00  |
| ATOM | 424 | HE3  | MET | 75 | -30.649 | 0.717  | 6.169  | 1.00 | 0.03  |
| ATOM | 425 | HE2  | MET | 75 | -29.462 | 0.808  | 4.828  | 1.00 | 0.03  |
| ATOM | 426 | HE1  | MET | 75 | -29.289 | 1.884  | 6.253  | 1.00 | 0.03  |
| ATOM | 427 | N    | PHE | 76 | -26.610 | -2.275 | 11.859 | 1.00 | -0.26 |
| ATOM | 428 | CA   | PHE | 76 | -26.277 | -3.386 | 12.753 | 1.00 | 0.14  |
| ATOM | 429 | C    | PHE | 76 | -26.882 | -3.125 | 14.120 | 1.00 | 0.21  |
| ATOM | 430 | O    | PHE | 76 | -27.434 | -4.038 | 14.713 | 1.00 | -0.39 |
| ATOM | 431 | CB   | PHE | 76 | -24.755 | -3.636 | 12.957 | 1.00 | 0.02  |
| ATOM | 432 | CG   | PHE | 76 | -23.898 | -3.779 | 11.686 | 1.00 | -0.04 |
| ATOM | 433 | CD1  | PHE | 76 | -24.443 | -3.971 | 10.410 | 1.00 | -0.06 |
| ATOM | 434 | CD2  | PHE | 76 | -22.505 | -3.705 | 11.818 | 1.00 | -0.06 |
| ATOM | 435 | CE1  | PHE | 76 | -23.616 | -3.996 | 9.282  | 1.00 | -0.07 |
| ATOM | 436 | CE2  | PHE | 76 | -21.675 | -3.716 | 10.693 | 1.00 | -0.07 |
| ATOM | 437 | CZ   | PHE | 76 | -22.233 | -3.849 | 9.419  | 1.00 | -0.07 |
| ATOM | 438 | H    | PHE | 76 | -25.877 | -1.771 | 11.391 | 1.00 | 0.19  |
| ATOM | 439 | HA   | PHE | 76 | -26.728 | -4.304 | 12.343 | 1.00 | 0.08  |
| ATOM | 440 | HB2  | PHE | 76 | -24.621 | -4.554 | 13.551 | 1.00 | 0.05  |
| ATOM | 441 | HB1  | PHE | 76 | -24.342 | -2.799 | 13.541 | 1.00 | 0.05  |
| ATOM | 442 | HD1  | PHE | 76 | -25.509 | -4.101 | 10.271 | 1.00 | 0.06  |
| ATOM | 443 | HD2  | PHE | 76 | -22.057 | -3.632 | 12.804 | 1.00 | 0.06  |
| ATOM | 444 | HE1  | PHE | 76 | -24.052 | -4.129 | 8.297  | 1.00 | 0.06  |
| ATOM | 445 | HE2  | PHE | 76 | -20.599 | -3.617 | 10.807 | 1.00 | 0.06  |
| ATOM | 446 | HZ   | PHE | 76 | -21.595 | -3.838 | 8.541  | 1.00 | 0.06  |
| ATOM | 447 | N    | VAL | 87 | -26.809 | -1.885 | 14.653 | 1.00 | -0.26 |
| ATOM | 448 | CA   | VAL | 87 | -27.435 | -1.604 | 15.947 | 1.00 | 0.13  |
| ATOM | 449 | C    | VAL | 87 | -28.932 | -1.782 | 15.829 | 1.00 | 0.20  |
| ATOM | 450 | O    | VAL | 87 | -29.542 | -2.351 | 16.721 | 1.00 | -0.39 |
| ATOM | 451 | CB   | VAL | 87 | -27.103 | -0.187 | 16.500 | 1.00 | -0.01 |
| ATOM | 452 | CG1  | VAL | 87 | -27.897 | 0.120  | 17.802 | 1.00 | -0.06 |
| ATOM | 453 | CG2  | VAL | 87 | -25.580 | -0.034 | 16.778 | 1.00 | -0.06 |
| ATOM | 454 | H    | VAL | 87 | -26.373 | -1.142 | 14.139 | 1.00 | 0.19  |
| ATOM | 455 | HA   | VAL | 87 | -27.069 | -2.337 | 16.679 | 1.00 | 0.08  |
| ATOM | 456 | HB   | VAL | 87 | -27.413 | 0.550  | 15.745 | 1.00 | 0.03  |
| ATOM | 457 | HG13 | VAL | 87 | -28.982 | 0.137  | 17.616 | 1.00 | 0.02  |
| ATOM | 458 | HG12 | VAL | 87 | -27.611 | 1.106  | 18.201 | 1.00 | 0.02  |
| ATOM | 459 | HG11 | VAL | 87 | -27.685 | -0.643 | 18.568 | 1.00 | 0.02  |
| ATOM | 460 | HG23 | VAL | 87 | -25.272 | -0.709 | 17.589 | 1.00 | 0.02  |
| ATOM | 461 | HG22 | VAL | 87 | -25.347 | 0.999  | 17.080 | 1.00 | 0.02  |
| ATOM | 462 | HG21 | VAL | 87 | -24.977 | -0.268 | 15.889 | 1.00 | 0.02  |
| ATOM | 463 | N    | PHE | 78 | -29.577 | -1.319 | 14.740 | 1.00 | -0.26 |
| ATOM | 464 | CA   | PHE | 78 | -31.002 | -1.606 | 14.592 | 1.00 | 0.14  |
| ATOM | 465 | C    | PHE | 78 | -31.198 | -3.107 | 14.619 | 1.00 | 0.21  |
| ATOM | 466 | O    | PHE | 78 | -32.144 | -3.575 | 15.231 | 1.00 | -0.39 |
| ATOM | 467 | CB   | PHE | 78 | -31.603 | -1.032 | 13.280 | 1.00 | 0.02  |
| ATOM | 468 | CG   | PHE | 78 | -31.326 | 0.462  | 13.029 | 1.00 | -0.04 |
| ATOM | 469 | CD1  | PHE | 78 | -30.901 | 1.343  | 14.034 | 1.00 | -0.06 |
| ATOM | 470 | CD2  | PHE | 78 | -31.499 | 0.958  | 11.731 | 1.00 | -0.06 |
| ATOM | 471 | CE1  | PHE | 78 | -30.586 | 2.670  | 13.728 | 1.00 | -0.07 |
| ATOM | 472 | CE2  | PHE | 78 | -31.173 | 2.281  | 11.418 | 1.00 | -0.07 |
| ATOM | 473 | CZ   | PHE | 78 | -30.709 | 3.139  | 12.418 | 1.00 | -0.07 |

|      |     |      |     |    |         |        |        |      |       |
|------|-----|------|-----|----|---------|--------|--------|------|-------|
| ATOM | 474 | H    | PHE | 78 | -29.084 | -0.837 | 14.008 | 1.00 | 0.19  |
| ATOM | 475 | HA   | PHE | 78 | -31.550 | -1.187 | 15.451 | 1.00 | 0.08  |
| ATOM | 476 | HB2  | PHE | 78 | -32.694 | -1.185 | 13.281 | 1.00 | 0.05  |
| ATOM | 477 | HB1  | PHE | 78 | -31.184 | -1.604 | 12.438 | 1.00 | 0.05  |
| ATOM | 478 | HD1  | PHE | 78 | -30.804 | 1.018  | 15.062 | 1.00 | 0.06  |
| ATOM | 479 | HD2  | PHE | 78 | -31.888 | 0.311  | 10.950 | 1.00 | 0.06  |
| ATOM | 480 | HE1  | PHE | 78 | -30.242 | 3.339  | 14.511 | 1.00 | 0.06  |
| ATOM | 481 | HE2  | PHE | 78 | -31.280 | 2.641  | 10.400 | 1.00 | 0.06  |
| ATOM | 482 | HZ   | PHE | 78 | -30.447 | 4.165  | 12.178 | 1.00 | 0.06  |
| ATOM | 483 | N    | HIS | 79 | -30.305 | -3.887 | 13.971 | 1.00 | -0.26 |
| ATOM | 484 | CA   | HIS | 79 | -30.436 | -5.344 | 14.002 | 1.00 | 0.14  |
| ATOM | 485 | C    | HIS | 79 | -30.140 | -5.879 | 15.388 | 1.00 | 0.21  |
| ATOM | 486 | O    | HIS | 79 | -30.765 | -6.849 | 15.783 | 1.00 | -0.39 |
| ATOM | 487 | CB   | HIS | 79 | -29.527 | -5.992 | 12.923 | 1.00 | 0.04  |
| ATOM | 488 | CG   | HIS | 79 | -29.724 | -5.339 | 11.573 | 1.00 | 0.06  |
| ATOM | 489 | ND1  | HIS | 79 | -28.849 | -5.411 | 10.593 | 1.00 | -0.26 |
| ATOM | 490 | CD2  | HIS | 79 | -30.784 | -4.600 | 11.180 | 1.00 | -0.03 |
| ATOM | 491 | CE1  | HIS | 79 | -29.280 | -4.742 | 9.571  | 1.00 | 0.09  |
| ATOM | 492 | NE2  | HIS | 79 | -30.398 | -4.247 | 9.842  | 1.00 | -0.34 |
| ATOM | 493 | H    | HIS | 79 | -29.530 | -3.474 | 13.483 | 1.00 | 0.19  |
| ATOM | 494 | HA   | HIS | 79 | -31.481 | -5.615 | 13.775 | 1.00 | 0.08  |
| ATOM | 495 | HB2  | HIS | 79 | -29.728 | -7.071 | 12.839 | 1.00 | 0.05  |
| ATOM | 496 | HB1  | HIS | 79 | -28.479 | -5.863 | 13.227 | 1.00 | 0.05  |
| ATOM | 497 | HD1  | HIS | 79 | -27.946 | -5.920 | 10.628 | 1.00 | 0.24  |
| ATOM | 498 | HD2  | HIS | 79 | -31.699 | -4.318 | 11.698 | 1.00 | 0.03  |
| ATOM | 499 | HE1  | HIS | 79 | -28.786 | -4.600 | 8.611  | 1.00 | 0.11  |
| ATOM | 500 | N    | MET | 80 | -29.219 | -5.273 | 16.171 | 1.00 | -0.26 |
| ATOM | 501 | CA   | MET | 80 | -29.122 | -5.644 | 17.584 | 1.00 | 0.13  |
| ATOM | 502 | C    | MET | 80 | -30.457 | -5.353 | 18.235 | 1.00 | 0.20  |
| ATOM | 503 | O    | MET | 80 | -30.966 | -6.168 | 18.990 | 1.00 | -0.39 |
| ATOM | 504 | CB   | MET | 80 | -28.088 | -4.816 | 18.403 | 1.00 | 0.00  |
| ATOM | 505 | CG   | MET | 80 | -26.618 | -5.003 | 17.954 | 1.00 | 0.00  |
| ATOM | 506 | SD   | MET | 80 | -25.619 | -3.712 | 18.773 | 1.00 | -0.16 |
| ATOM | 507 | CE   | MET | 80 | -24.231 | -3.524 | 17.612 | 1.00 | -0.02 |
| ATOM | 508 | H    | MET | 80 | -28.664 | -4.518 | 15.813 | 1.00 | 0.19  |
| ATOM | 509 | HA   | MET | 80 | -28.899 | -6.719 | 17.680 | 1.00 | 0.08  |
| ATOM | 510 | HB2  | MET | 80 | -28.155 | -5.095 | 19.468 | 1.00 | 0.03  |
| ATOM | 511 | HB1  | MET | 80 | -28.343 | -3.750 | 18.329 | 1.00 | 0.03  |
| ATOM | 512 | HG2  | MET | 80 | -26.512 | -4.904 | 16.866 | 1.00 | 0.04  |
| ATOM | 513 | HG1  | MET | 80 | -26.254 | -5.994 | 18.260 | 1.00 | 0.04  |
| ATOM | 514 | LPD2 | MET | 80 | -26.170 | -4.516 | 19.490 | 1.00 | 0.00  |
| ATOM | 515 | LPD1 | MET | 80 | -26.554 | -3.811 | 18.725 | 1.00 | 0.00  |
| ATOM | 516 | HE3  | MET | 80 | -23.689 | -4.473 | 17.511 | 1.00 | 0.03  |
| ATOM | 517 | HE2  | MET | 80 | -23.548 | -2.759 | 18.008 | 1.00 | 0.03  |
| ATOM | 518 | HE1  | MET | 80 | -24.598 | -3.207 | 16.624 | 1.00 | 0.03  |
| ATOM | 519 | N    | ARG | 81 | -31.057 | -4.173 | 17.974 | 1.00 | -0.26 |
| ATOM | 520 | CA   | ARG | 81 | -32.295 | -3.813 | 18.666 | 1.00 | 0.13  |
| ATOM | 521 | C    | ARG | 81 | -33.477 | -4.575 | 18.098 | 1.00 | 0.25  |
| ATOM | 522 | O    | ARG | 81 | -34.439 | -3.980 | 17.641 | 1.00 | -0.33 |
| ATOM | 523 | CB   | ARG | 81 | -32.480 | -2.268 | 18.617 | 1.00 | -0.01 |
| ATOM | 524 | CG   | ARG | 81 | -33.564 | -1.748 | 19.604 | 1.00 | -0.02 |
| ATOM | 525 | CD   | ARG | 81 | -33.689 | -0.199 | 19.543 | 1.00 | 0.06  |
| ATOM | 526 | NE   | ARG | 81 | -34.693 | 0.307  | 20.488 | 1.00 | -0.27 |
| ATOM | 527 | CZ   | ARG | 81 | -34.967 | 1.582  | 20.653 | 1.00 | 0.29  |
| ATOM | 528 | NH1  | ARG | 81 | -34.367 | 2.528  | 19.974 | 1.00 | -0.28 |
| ATOM | 529 | NH2  | ARG | 81 | -35.876 | 1.928  | 21.532 | 1.00 | -0.28 |
| ATOM | 530 | H    | ARG | 81 | -30.667 | -3.534 | 17.302 | 1.00 | 0.19  |
| ATOM | 531 | HA   | ARG | 81 | -32.206 | -4.099 | 19.727 | 1.00 | 0.08  |

|      |     |      |     |    |         |         |        |      |       |
|------|-----|------|-----|----|---------|---------|--------|------|-------|
| ATOM | 532 | HB2  | ARG | 81 | -32.729 | -1.971  | 17.586 | 1.00 | 0.03  |
| ATOM | 533 | HB1  | ARG | 81 | -31.518 | -1.800  | 18.885 | 1.00 | 0.03  |
| ATOM | 534 | HG2  | ARG | 81 | -33.294 | -2.043  | 20.631 | 1.00 | 0.03  |
| ATOM | 535 | HG1  | ARG | 81 | -34.543 | -2.193  | 19.366 | 1.00 | 0.03  |
| ATOM | 536 | HD2  | ARG | 81 | -33.968 | 0.075   | 18.511 | 1.00 | 0.07  |
| ATOM | 537 | HD1  | ARG | 81 | -32.699 | 0.223   | 19.784 | 1.00 | 0.07  |
| ATOM | 538 | HE   | ARG | 81 | -35.203 | -0.394  | 21.050 | 1.00 | 0.26  |
| ATOM | 539 | HH11 | ARG | 81 | -33.651 | 2.315   | 19.270 | 1.00 | 0.26  |
| ATOM | 540 | HH12 | ARG | 81 | -34.598 | 3.520   | 20.122 | 1.00 | 0.26  |
| ATOM | 541 | HH21 | ARG | 81 | -36.377 | 1.222   | 22.092 | 1.00 | 0.26  |
| ATOM | 542 | HH22 | ARG | 81 | -36.119 | 2.916   | 21.692 | 1.00 | 0.26  |
| TER  | 543 | ARG  | 81  |    |         |         |        |      |       |
| ATOM | 544 | C    | ACE | 86 | -26.162 | -11.300 | 18.474 | 1.00 | 0.18  |
| ATOM | 545 | O    | ACE | 86 | -26.571 | -10.372 | 17.801 | 1.00 | -0.40 |
| ATOM | 546 | CH3  | ACE | 86 | -26.277 | -12.698 | 17.928 | 1.00 | 0.03  |
| ATOM | 547 | H    | ACE | 86 | -26.727 | -13.363 | 18.680 | 1.00 | 0.05  |
| ATOM | 548 | H    | ACE | 86 | -25.277 | -13.069 | 17.665 | 1.00 | 0.05  |
| ATOM | 549 | H    | ACE | 86 | -26.909 | -12.709 | 17.026 | 1.00 | 0.05  |
| ATOM | 550 | N    | SER | 87 | -25.600 | -11.120 | 19.689 | 1.00 | -0.26 |
| ATOM | 551 | CA   | SER | 87 | -25.468 | -9.780  | 20.267 | 1.00 | 0.15  |
| ATOM | 552 | C    | SER | 87 | -24.004 | -9.436  | 20.419 | 1.00 | 0.21  |
| ATOM | 553 | O    | SER | 87 | -23.510 | -8.582  | 19.701 | 1.00 | -0.39 |
| ATOM | 554 | CB   | SER | 87 | -26.151 | -9.787  | 21.657 | 1.00 | 0.08  |
| ATOM | 555 | OG   | SER | 87 | -25.512 | -10.794 | 22.469 | 1.00 | -0.39 |
| ATOM | 556 | H    | SER | 87 | -25.274 | -11.897 | 20.231 | 1.00 | 0.19  |
| ATOM | 557 | HA   | SER | 87 | -25.943 | -8.995  | 19.653 | 1.00 | 0.08  |
| ATOM | 558 | HB2  | SER | 87 | -27.221 | -10.020 | 21.525 | 1.00 | 0.06  |
| ATOM | 559 | HB1  | SER | 87 | -26.056 | -8.793  | 22.125 | 1.00 | 0.06  |
| ATOM | 560 | HG   | SER | 87 | -25.900 | -10.866 | 23.338 | 1.00 | 0.21  |
| ATOM | 561 | N    | VAL | 88 | -23.276 | -10.095 | 21.346 | 1.00 | -0.26 |
| ATOM | 562 | CA   | VAL | 88 | -21.859 | -9.775  | 21.525 | 1.00 | 0.13  |
| ATOM | 563 | C    | VAL | 88 | -21.157 | -9.815  | 20.187 | 1.00 | 0.20  |
| ATOM | 564 | O    | VAL | 88 | -20.375 | -8.923  | 19.903 | 1.00 | -0.39 |
| ATOM | 565 | CB   | VAL | 88 | -21.154 | -10.707 | 22.557 | 1.00 | -0.01 |
| ATOM | 566 | CG1  | VAL | 88 | -19.609 | -10.529 | 22.518 | 1.00 | -0.06 |
| ATOM | 567 | CG2  | VAL | 88 | -21.667 | -10.426 | 23.999 | 1.00 | -0.06 |
| ATOM | 568 | H    | VAL | 88 | -23.715 | -10.785 | 21.926 | 1.00 | 0.19  |
| ATOM | 569 | HA   | VAL | 88 | -21.787 | -8.743  | 21.895 | 1.00 | 0.08  |
| ATOM | 570 | HB   | VAL | 88 | -21.381 | -11.755 | 22.292 | 1.00 | 0.03  |
| ATOM | 571 | HG13 | VAL | 88 | -19.199 | -10.855 | 21.551 | 1.00 | 0.02  |
| ATOM | 572 | HG12 | VAL | 88 | -19.129 | -11.134 | 23.302 | 1.00 | 0.02  |
| ATOM | 573 | HG11 | VAL | 88 | -19.342 | -9.473  | 22.677 | 1.00 | 0.02  |
| ATOM | 574 | HG23 | VAL | 88 | -21.418 | -9.396  | 24.300 | 1.00 | 0.02  |
| ATOM | 575 | HG22 | VAL | 88 | -21.194 | -11.118 | 24.713 | 1.00 | 0.02  |
| ATOM | 576 | HG21 | VAL | 88 | -22.756 | -10.554 | 24.078 | 1.00 | 0.02  |
| ATOM | 577 | N    | TYR | 89 | -21.416 | -10.821 | 19.327 | 1.00 | -0.26 |
| ATOM | 578 | CA   | TYR | 89 | -20.757 | -10.822 | 18.021 | 1.00 | 0.14  |
| ATOM | 579 | C    | TYR | 89 | -21.127 | -9.571  | 17.251 | 1.00 | 0.21  |
| ATOM | 580 | O    | TYR | 89 | -20.250 | -8.937  | 16.686 | 1.00 | -0.39 |
| ATOM | 581 | CB   | TYR | 89 | -21.113 | -12.083 | 17.192 | 1.00 | 0.02  |
| ATOM | 582 | CG   | TYR | 89 | -20.798 | -13.350 | 18.005 | 1.00 | -0.05 |
| ATOM | 583 | CD1  | TYR | 89 | -19.469 | -13.706 | 18.262 | 1.00 | -0.07 |
| ATOM | 584 | CD2  | TYR | 89 | -21.827 | -14.157 | 18.504 | 1.00 | -0.07 |
| ATOM | 585 | CE1  | TYR | 89 | -19.175 | -14.822 | 19.051 | 1.00 | -0.04 |
| ATOM | 586 | CE2  | TYR | 89 | -21.533 | -15.281 | 19.281 | 1.00 | -0.04 |
| ATOM | 587 | CZ   | TYR | 89 | -20.204 | -15.609 | 19.574 | 1.00 | 0.08  |
| ATOM | 588 | OH   | TYR | 89 | -19.895 | -16.714 | 20.379 | 1.00 | -0.34 |
| ATOM | 589 | H    | TYR | 89 | -22.060 | -11.546 | 19.569 | 1.00 | 0.19  |

|      |     |      |     |    |         |         |        |      |       |
|------|-----|------|-----|----|---------|---------|--------|------|-------|
| ATOM | 590 | HA   | TYR | 89 | -19.668 | -10.809 | 18.183 | 1.00 | 0.08  |
| ATOM | 591 | HB1  | TYR | 89 | -20.528 | -12.096 | 16.258 | 1.00 | 0.05  |
| ATOM | 592 | HB2  | TYR | 89 | -22.180 | -12.049 | 16.921 | 1.00 | 0.05  |
| ATOM | 593 | HD1  | TYR | 89 | -18.657 | -13.114 | 17.852 | 1.00 | 0.05  |
| ATOM | 594 | HD2  | TYR | 89 | -22.864 | -13.917 | 18.295 | 1.00 | 0.05  |
| ATOM | 595 | HE1  | TYR | 89 | -18.142 | -15.076 | 19.262 | 1.00 | 0.05  |
| ATOM | 596 | HE2  | TYR | 89 | -22.344 | -15.899 | 19.655 | 1.00 | 0.05  |
| ATOM | 597 | HH   | TYR | 89 | -20.565 | -16.831 | 21.051 | 1.00 | 0.25  |
| ATOM | 598 | N    | MET | 90 | -22.416 | -9.165  | 17.214 | 1.00 | -0.26 |
| ATOM | 599 | CA   | MET | 90 | -22.737 | -7.897  | 16.561 | 1.00 | 0.13  |
| ATOM | 600 | C    | MET | 90 | -21.979 | -6.788  | 17.254 | 1.00 | 0.20  |
| ATOM | 601 | O    | MET | 90 | -21.516 | -5.886  | 16.574 | 1.00 | -0.39 |
| ATOM | 602 | CB   | MET | 90 | -24.241 | -7.518  | 16.601 | 1.00 | 0.00  |
| ATOM | 603 | CG   | MET | 90 | -25.146 | -8.400  | 15.705 | 1.00 | 0.00  |
| ATOM | 604 | SD   | MET | 90 | -26.838 | -7.755  | 15.941 | 1.00 | -0.16 |
| ATOM | 605 | CE   | MET | 90 | -27.870 | -8.976  | 15.083 | 1.00 | -0.02 |
| ATOM | 606 | H    | MET | 90 | -23.136 | -9.659  | 17.707 | 1.00 | 0.19  |
| ATOM | 607 | HA   | MET | 90 | -22.415 | -7.934  | 15.509 | 1.00 | 0.08  |
| ATOM | 608 | HB2  | MET | 90 | -24.355 | -6.479  | 16.250 | 1.00 | 0.03  |
| ATOM | 609 | HB1  | MET | 90 | -24.583 | -7.575  | 17.644 | 1.00 | 0.03  |
| ATOM | 610 | HG2  | MET | 90 | -25.086 | -9.456  | 16.004 | 1.00 | 0.04  |
| ATOM | 611 | HG1  | MET | 90 | -24.870 | -8.312  | 14.643 | 1.00 | 0.04  |
| ATOM | 612 | LPD2 | MET | 90 | -27.711 | -9.545  | 16.796 | 1.00 | 0.00  |
| ATOM | 613 | LPD1 | MET | 90 | -27.629 | -10.095 | 17.755 | 1.00 | 0.00  |
| ATOM | 614 | HE3  | MET | 90 | -27.682 | -8.905  | 14.006 | 1.00 | 0.03  |
| ATOM | 615 | HE2  | MET | 90 | -28.928 | -8.750  | 15.279 | 1.00 | 0.03  |
| ATOM | 616 | HE1  | MET | 90 | -27.645 | -9.991  | 15.438 | 1.00 | 0.03  |
| ATOM | 617 | N    | PHE | 91 | -21.834 | -6.814  | 18.597 | 1.00 | -0.26 |
| ATOM | 618 | CA   | PHE | 91 | -21.068 | -5.756  | 19.253 | 1.00 | 0.14  |
| ATOM | 619 | C    | PHE | 91 | -19.643 | -5.815  | 18.750 | 1.00 | 0.21  |
| ATOM | 620 | O    | PHE | 91 | -19.095 | -4.789  | 18.381 | 1.00 | -0.39 |
| ATOM | 621 | CB   | PHE | 91 | -21.044 | -5.852  | 20.805 | 1.00 | 0.02  |
| ATOM | 622 | CG   | PHE | 91 | -22.410 | -5.997  | 21.501 | 1.00 | -0.04 |
| ATOM | 623 | CD1  | PHE | 91 | -23.634 | -5.838  | 20.841 | 1.00 | -0.06 |
| ATOM | 624 | CD2  | PHE | 91 | -22.420 | -6.308  | 22.867 | 1.00 | -0.06 |
| ATOM | 625 | CE1  | PHE | 91 | -24.842 | -6.030  | 21.519 | 1.00 | -0.07 |
| ATOM | 626 | CE2  | PHE | 91 | -23.623 | -6.500  | 23.550 | 1.00 | -0.07 |
| ATOM | 627 | CZ   | PHE | 91 | -24.838 | -6.356  | 22.877 | 1.00 | -0.07 |
| ATOM | 628 | H    | PHE | 91 | -22.219 | -7.559  | 19.149 | 1.00 | 0.19  |
| ATOM | 629 | HA   | PHE | 91 | -21.495 | -4.778  | 18.977 | 1.00 | 0.08  |
| ATOM | 630 | HB2  | PHE | 91 | -20.553 | -4.952  | 21.209 | 1.00 | 0.05  |
| ATOM | 631 | HB1  | PHE | 91 | -20.433 | -6.720  | 21.096 | 1.00 | 0.05  |
| ATOM | 632 | HD1  | PHE | 91 | -23.672 | -5.565  | 19.795 | 1.00 | 0.06  |
| ATOM | 633 | HD2  | PHE | 91 | -21.483 | -6.405  | 23.408 | 1.00 | 0.06  |
| ATOM | 634 | HE1  | PHE | 91 | -25.784 | -5.925  | 20.991 | 1.00 | 0.06  |
| ATOM | 635 | HE2  | PHE | 91 | -23.614 | -6.761  | 24.605 | 1.00 | 0.06  |
| ATOM | 636 | HZ   | PHE | 91 | -25.775 | -6.494  | 23.408 | 1.00 | 0.06  |
| ATOM | 637 | N    | ASN | 92 | -19.008 | -7.007  | 18.716 | 1.00 | -0.26 |
| ATOM | 638 | CA   | ASN | 92 | -17.638 | -7.076  | 18.216 | 1.00 | 0.15  |
| ATOM | 639 | C    | ASN | 92 | -17.580 | -6.566  | 16.795 | 1.00 | 0.21  |
| ATOM | 640 | O    | ASN | 92 | -16.656 | -5.844  | 16.459 | 1.00 | -0.39 |
| ATOM | 641 | CB   | ASN | 92 | -17.057 | -8.516  | 18.206 | 1.00 | 0.08  |
| ATOM | 642 | CG   | ASN | 92 | -17.145 | -9.235  | 19.530 | 1.00 | 0.18  |
| ATOM | 643 | OD1  | ASN | 92 | -17.606 | -10.364 | 19.552 | 1.00 | -0.40 |
| ATOM | 644 | ND2  | ASN | 92 | -16.706 | -8.656  | 20.666 | 1.00 | -0.30 |
| ATOM | 645 | H    | ASN | 92 | -19.471 | -7.850  | 19.005 | 1.00 | 0.19  |
| ATOM | 646 | HA   | ASN | 92 | -17.003 | -6.420  | 18.832 | 1.00 | 0.08  |
| ATOM | 647 | HB2  | ASN | 92 | -16.000 | -8.490  | 17.901 | 1.00 | 0.06  |

|      |     |      |     |    |         |         |        |      |       |
|------|-----|------|-----|----|---------|---------|--------|------|-------|
| ATOM | 648 | HB1  | ASN | 92 | -17.609 | -9.110  | 17.460 | 1.00 | 0.06  |
| ATOM | 649 | HD21 | ASN | 92 | -16.295 | -7.747  | 20.686 | 1.00 | 0.18  |
| ATOM | 650 | HD22 | ASN | 92 | -16.788 | -9.173  | 21.518 | 1.00 | 0.18  |
| ATOM | 651 | N    | LEU | 93 | -18.550 | -6.936  | 15.934 | 1.00 | -0.26 |
| ATOM | 652 | CA   | LEU | 93 | -18.503 | -6.456  | 14.553 | 1.00 | 0.13  |
| ATOM | 653 | C    | LEU | 93 | -18.743 | -4.962  | 14.515 | 1.00 | 0.20  |
| ATOM | 654 | O    | LEU | 93 | -18.040 | -4.264  | 13.802 | 1.00 | -0.39 |
| ATOM | 655 | CB   | LEU | 93 | -19.546 | -7.186  | 13.664 | 1.00 | -0.01 |
| ATOM | 656 | CG   | LEU | 93 | -19.292 | -8.721  | 13.533 | 1.00 | -0.04 |
| ATOM | 657 | CD1  | LEU | 93 | -20.551 | -9.405  | 12.933 | 1.00 | -0.06 |
| ATOM | 658 | CD2  | LEU | 93 | -18.032 | -9.042  | 12.680 | 1.00 | -0.06 |
| ATOM | 659 | H    | LEU | 93 | -19.321 | -7.506  | 16.242 | 1.00 | 0.19  |
| ATOM | 660 | HA   | LEU | 93 | -17.497 | -6.625  | 14.141 | 1.00 | 0.08  |
| ATOM | 661 | HB2  | LEU | 93 | -19.550 | -6.731  | 12.660 | 1.00 | 0.03  |
| ATOM | 662 | HB1  | LEU | 93 | -20.536 | -7.005  | 14.110 | 1.00 | 0.03  |
| ATOM | 663 | HG   | LEU | 93 | -19.124 | -9.174  | 14.522 | 1.00 | 0.03  |
| ATOM | 664 | HD13 | LEU | 93 | -21.418 | -9.274  | 13.599 | 1.00 | 0.02  |
| ATOM | 665 | HD12 | LEU | 93 | -20.389 | -10.487 | 12.803 | 1.00 | 0.02  |
| ATOM | 666 | HD11 | LEU | 93 | -20.791 | -8.957  | 11.960 | 1.00 | 0.02  |
| ATOM | 667 | HD23 | LEU | 93 | -18.089 | -8.536  | 11.709 | 1.00 | 0.02  |
| ATOM | 668 | HD22 | LEU | 93 | -17.950 | -10.126 | 12.505 | 1.00 | 0.02  |
| ATOM | 669 | HD21 | LEU | 93 | -17.109 | -8.722  | 13.184 | 1.00 | 0.02  |
| ATOM | 670 | N    | ALA | 94 | -19.726 | -4.431  | 15.271 | 1.00 | -0.26 |
| ATOM | 671 | CA   | ALA | 94 | -19.924 | -2.982  | 15.294 | 1.00 | 0.13  |
| ATOM | 672 | C    | ALA | 94 | -18.686 | -2.293  | 15.818 | 1.00 | 0.20  |
| ATOM | 673 | O    | ALA | 94 | -18.266 | -1.302  | 15.244 | 1.00 | -0.39 |
| ATOM | 674 | CB   | ALA | 94 | -21.118 | -2.602  | 16.206 | 1.00 | -0.02 |
| ATOM | 675 | H    | ALA | 94 | -20.299 | -5.016  | 15.852 | 1.00 | 0.19  |
| ATOM | 676 | HA   | ALA | 94 | -20.116 | -2.620  | 14.270 | 1.00 | 0.08  |
| ATOM | 677 | HB3  | ALA | 94 | -20.970 | -3.006  | 17.218 | 1.00 | 0.03  |
| ATOM | 678 | HB2  | ALA | 94 | -22.046 | -3.019  | 15.786 | 1.00 | 0.03  |
| ATOM | 679 | HB1  | ALA | 94 | -21.217 | -1.509  | 16.285 | 1.00 | 0.03  |
| ATOM | 680 | N    | LEU | 95 | -18.080 | -2.796  | 16.913 | 1.00 | -0.26 |
| ATOM | 681 | CA   | LEU | 95 | -16.861 | -2.168  | 17.420 | 1.00 | 0.13  |
| ATOM | 682 | C    | LEU | 95 | -15.763 | -2.301  | 16.388 | 1.00 | 0.20  |
| ATOM | 683 | O    | LEU | 95 | -15.078 | -1.329  | 16.106 | 1.00 | -0.39 |
| ATOM | 684 | CB   | LEU | 95 | -16.415 | -2.806  | 18.766 | 1.00 | -0.01 |
| ATOM | 685 | CG   | LEU | 95 | -17.405 | -2.534  | 19.943 | 1.00 | -0.04 |
| ATOM | 686 | CD1  | LEU | 95 | -17.161 | -3.551  | 21.094 | 1.00 | -0.06 |
| ATOM | 687 | CD2  | LEU | 95 | -17.283 | -1.084  | 20.492 | 1.00 | -0.06 |
| ATOM | 688 | H    | LEU | 95 | -18.433 | -3.628  | 17.352 | 1.00 | 0.19  |
| ATOM | 689 | HA   | LEU | 95 | -17.029 | -1.094  | 17.570 | 1.00 | 0.08  |
| ATOM | 690 | HB2  | LEU | 95 | -15.417 | -2.429  | 19.042 | 1.00 | 0.03  |
| ATOM | 691 | HB1  | LEU | 95 | -16.320 | -3.890  | 18.596 | 1.00 | 0.03  |
| ATOM | 692 | HG   | LEU | 95 | -18.445 | -2.670  | 19.600 | 1.00 | 0.03  |
| ATOM | 693 | HD13 | LEU | 95 | -17.325 | -4.582  | 20.742 | 1.00 | 0.02  |
| ATOM | 694 | HD12 | LEU | 95 | -17.854 | -3.367  | 21.930 | 1.00 | 0.02  |
| ATOM | 695 | HD11 | LEU | 95 | -16.129 | -3.465  | 21.466 | 1.00 | 0.02  |
| ATOM | 696 | HD23 | LEU | 95 | -16.259 | -0.892  | 20.846 | 1.00 | 0.02  |
| ATOM | 697 | HD22 | LEU | 95 | -17.973 | -0.938  | 21.337 | 1.00 | 0.02  |
| ATOM | 698 | HD21 | LEU | 95 | -17.535 | -0.335  | 19.727 | 1.00 | 0.02  |
| ATOM | 699 | N    | ALA | 96 | -15.571 | -3.502  | 15.803 | 1.00 | -0.26 |
| ATOM | 700 | CA   | ALA | 96 | -14.515 | -3.656  | 14.807 | 1.00 | 0.13  |
| ATOM | 701 | C    | ALA | 96 | -14.781 | -2.770  | 13.611 | 1.00 | 0.20  |
| ATOM | 702 | O    | ALA | 96 | -13.848 | -2.174  | 13.100 | 1.00 | -0.39 |
| ATOM | 703 | CB   | ALA | 96 | -14.389 | -5.129  | 14.338 | 1.00 | -0.02 |
| ATOM | 704 | H    | ALA | 96 | -16.151 | -4.291  | 16.028 | 1.00 | 0.19  |
| ATOM | 705 | HA   | ALA | 96 | -13.556 | -3.364  | 15.265 | 1.00 | 0.08  |

|      |     |      |     |     |         |        |        |      |       |
|------|-----|------|-----|-----|---------|--------|--------|------|-------|
| ATOM | 706 | HB3  | ALA | 96  | -15.297 | -5.435 | 13.797 | 1.00 | 0.03  |
| ATOM | 707 | HB2  | ALA | 96  | -14.248 | -5.793 | 15.204 | 1.00 | 0.03  |
| ATOM | 708 | HB1  | ALA | 96  | -13.522 | -5.243 | 13.671 | 1.00 | 0.03  |
| ATOM | 709 | N    | ASP | 97  | -16.039 | -2.660 | 13.131 | 1.00 | -0.26 |
| ATOM | 710 | CA   | ASP | 97  | -16.304 | -1.817 | 11.962 | 1.00 | 0.14  |
| ATOM | 711 | C    | ASP | 97  | -16.232 | -0.355 | 12.370 | 1.00 | 0.21  |
| ATOM | 712 | O    | ASP | 97  | -15.672 | 0.444  | 11.633 | 1.00 | -0.39 |
| ATOM | 713 | CB   | ASP | 97  | -17.643 | -2.236 | 11.298 | 1.00 | 0.03  |
| ATOM | 714 | CG   | ASP | 97  | -17.759 | -1.810 | 9.858  | 1.00 | 0.03  |
| ATOM | 715 | OD1  | ASP | 97  | -18.285 | -0.705 | 9.555  | 1.00 | -0.57 |
| ATOM | 716 | OD2  | ASP | 97  | -17.319 | -2.593 | 8.979  | 1.00 | -0.57 |
| ATOM | 717 | H    | ASP | 97  | -16.803 | -3.135 | 13.579 | 1.00 | 0.19  |
| ATOM | 718 | HA   | ASP | 97  | -15.516 | -2.003 | 11.216 | 1.00 | 0.08  |
| ATOM | 719 | HB2  | ASP | 97  | -18.483 | -1.866 | 11.895 | 1.00 | 0.05  |
| ATOM | 720 | HB1  | ASP | 97  | -17.703 | -3.336 | 11.288 | 1.00 | 0.05  |
| ATOM | 721 | N    | PHE | 98  | -16.746 | 0.056  | 13.556 | 1.00 | -0.26 |
| ATOM | 722 | CA   | PHE | 98  | -16.565 | 1.447  | 13.989 | 1.00 | 0.14  |
| ATOM | 723 | C    | PHE | 98  | -15.109 | 1.848  | 13.882 | 1.00 | 0.21  |
| ATOM | 724 | O    | PHE | 98  | -14.854 | 3.018  | 13.637 | 1.00 | -0.39 |
| ATOM | 725 | CB   | PHE | 98  | -17.005 | 1.760  | 15.453 | 1.00 | 0.02  |
| ATOM | 726 | CG   | PHE | 98  | -18.505 | 2.053  | 15.665 | 1.00 | -0.04 |
| ATOM | 727 | CD1  | PHE | 98  | -19.132 | 3.094  | 14.969 | 1.00 | -0.06 |
| ATOM | 728 | CD2  | PHE | 98  | -19.263 | 1.313  | 16.582 | 1.00 | -0.06 |
| ATOM | 729 | CE1  | PHE | 98  | -20.479 | 3.398  | 15.189 | 1.00 | -0.07 |
| ATOM | 730 | CE2  | PHE | 98  | -20.596 | 1.645  | 16.844 | 1.00 | -0.07 |
| ATOM | 731 | CZ   | PHE | 98  | -21.208 | 2.691  | 16.148 | 1.00 | -0.07 |
| ATOM | 732 | H    | PHE | 98  | -17.226 | -0.583 | 14.164 | 1.00 | 0.19  |
| ATOM | 733 | HA   | PHE | 98  | -17.104 | 2.096  | 13.284 | 1.00 | 0.08  |
| ATOM | 734 | HB2  | PHE | 98  | -16.514 | 2.686  | 15.794 | 1.00 | 0.05  |
| ATOM | 735 | HB1  | PHE | 98  | -16.648 | 0.947  | 16.102 | 1.00 | 0.05  |
| ATOM | 736 | HD1  | PHE | 98  | -18.576 | 3.688  | 14.255 | 1.00 | 0.06  |
| ATOM | 737 | HD2  | PHE | 98  | -18.822 | 0.476  | 17.109 | 1.00 | 0.06  |
| ATOM | 738 | HE1  | PHE | 98  | -20.960 | 4.186  | 14.617 | 1.00 | 0.06  |
| ATOM | 739 | HE2  | PHE | 98  | -21.159 | 1.087  | 17.586 | 1.00 | 0.06  |
| ATOM | 740 | HZ   | PHE | 98  | -22.244 | 2.949  | 16.346 | 1.00 | 0.06  |
| ATOM | 741 | N    | LEU | 99  | -14.134 | 0.923  | 14.041 | 1.00 | -0.26 |
| ATOM | 742 | CA   | LEU | 99  | -12.744 | 1.313  | 13.807 | 1.00 | 0.13  |
| ATOM | 743 | C    | LEU | 99  | -12.648 | 2.088  | 12.513 | 1.00 | 0.20  |
| ATOM | 744 | O    | LEU | 99  | -11.889 | 3.041  | 12.470 | 1.00 | -0.39 |
| ATOM | 745 | CB   | LEU | 99  | -11.738 | 0.135  | 13.672 | 1.00 | -0.01 |
| ATOM | 746 | CG   | LEU | 99  | -11.546 | -0.734 | 14.952 | 1.00 | -0.04 |
| ATOM | 747 | CD1  | LEU | 99  | -10.662 | -1.968 | 14.613 | 1.00 | -0.06 |
| ATOM | 748 | CD2  | LEU | 99  | -10.908 | 0.068  | 16.121 | 1.00 | -0.06 |
| ATOM | 749 | H    | LEU | 99  | -14.349 | -0.026 | 14.285 | 1.00 | 0.19  |
| ATOM | 750 | HA   | LEU | 99  | -12.432 | 1.995  | 14.613 | 1.00 | 0.08  |
| ATOM | 751 | HB2  | LEU | 99  | -10.751 | 0.541  | 13.392 | 1.00 | 0.03  |
| ATOM | 752 | HB1  | LEU | 99  | -12.079 | -0.493 | 12.836 | 1.00 | 0.03  |
| ATOM | 753 | HG   | LEU | 99  | -12.522 | -1.110 | 15.295 | 1.00 | 0.03  |
| ATOM | 754 | HD13 | LEU | 99  | -11.119 | -2.566 | 13.809 | 1.00 | 0.02  |
| ATOM | 755 | HD12 | LEU | 99  | -10.547 | -2.617 | 15.495 | 1.00 | 0.02  |
| ATOM | 756 | HD11 | LEU | 99  | -9.662  | -1.646 | 14.284 | 1.00 | 0.02  |
| ATOM | 757 | HD23 | LEU | 99  | -9.959  | 0.525  | 15.803 | 1.00 | 0.02  |
| ATOM | 758 | HD22 | LEU | 99  | -10.704 | -0.599 | 16.973 | 1.00 | 0.02  |
| ATOM | 759 | HD21 | LEU | 99  | -11.581 | 0.861  | 16.479 | 1.00 | 0.02  |
| ATOM | 760 | N    | TYR | 100 | -13.380 | 1.742  | 11.434 | 1.00 | -0.26 |
| ATOM | 761 | CA   | TYR | 100 | -13.259 | 2.550  | 10.223 | 1.00 | 0.14  |
| ATOM | 762 | C    | TYR | 100 | -13.766 | 3.953  | 10.453 | 1.00 | 0.21  |
| ATOM | 763 | O    | TYR | 100 | -13.136 | 4.898  | 10.002 | 1.00 | -0.39 |

|      |     |      |     |     |         |        |        |      |       |
|------|-----|------|-----|-----|---------|--------|--------|------|-------|
| ATOM | 764 | CB   | TYR | 100 | -14.034 | 1.963  | 9.018  | 1.00 | 0.02  |
| ATOM | 765 | CG   | TYR | 100 | -13.586 | 0.516  | 8.798  | 1.00 | -0.05 |
| ATOM | 766 | CD1  | TYR | 100 | -12.254 | 0.220  | 8.490  | 1.00 | -0.07 |
| ATOM | 767 | CD2  | TYR | 100 | -14.511 | -0.525 | 8.924  | 1.00 | -0.07 |
| ATOM | 768 | CE1  | TYR | 100 | -11.817 | -1.107 | 8.471  | 1.00 | -0.04 |
| ATOM | 769 | CE2  | TYR | 100 | -14.085 | -1.849 | 8.832  | 1.00 | -0.04 |
| ATOM | 770 | CZ   | TYR | 100 | -12.730 | -2.145 | 8.681  | 1.00 | 0.08  |
| ATOM | 771 | OH   | TYR | 100 | -12.311 | -3.472 | 8.742  | 1.00 | -0.34 |
| ATOM | 772 | H    | TYR | 100 | -14.030 | 0.974  | 11.459 | 1.00 | 0.19  |
| ATOM | 773 | HA   | TYR | 100 | -12.190 | 2.603  | 9.984  | 1.00 | 0.08  |
| ATOM | 774 | HB1  | TYR | 100 | -13.839 | 2.544  | 8.104  | 1.00 | 0.05  |
| ATOM | 775 | HB2  | TYR | 100 | -15.115 | 2.014  | 9.225  | 1.00 | 0.05  |
| ATOM | 776 | HD1  | TYR | 100 | -11.549 | 1.014  | 8.271  | 1.00 | 0.05  |
| ATOM | 777 | HD2  | TYR | 100 | -15.560 | -0.317 | 9.100  | 1.00 | 0.05  |
| ATOM | 778 | HE1  | TYR | 100 | -10.770 | -1.327 | 8.296  | 1.00 | 0.05  |
| ATOM | 779 | HE2  | TYR | 100 | -14.813 | -2.647 | 8.881  | 1.00 | 0.05  |
| ATOM | 780 | HH   | TYR | 100 | -11.497 | -3.608 | 8.283  | 1.00 | 0.25  |
| ATOM | 781 | N    | VAL | 101 | -14.914 | 4.092  | 11.151 | 1.00 | -0.26 |
| ATOM | 782 | CA   | VAL | 101 | -15.479 | 5.418  | 11.394 | 1.00 | 0.13  |
| ATOM | 783 | C    | VAL | 101 | -14.539 | 6.207  | 12.272 | 1.00 | 0.20  |
| ATOM | 784 | O    | VAL | 101 | -14.447 | 7.409  | 12.095 | 1.00 | -0.39 |
| ATOM | 785 | CB   | VAL | 101 | -16.878 | 5.344  | 12.079 | 1.00 | -0.01 |
| ATOM | 786 | CG1  | VAL | 101 | -17.428 | 6.756  | 12.433 | 1.00 | -0.06 |
| ATOM | 787 | CG2  | VAL | 101 | -17.911 | 4.607  | 11.181 | 1.00 | -0.06 |
| ATOM | 788 | H    | VAL | 101 | -15.343 | 3.290  | 11.570 | 1.00 | 0.19  |
| ATOM | 789 | HA   | VAL | 101 | -15.576 | 5.949  | 10.433 | 1.00 | 0.08  |
| ATOM | 790 | HB   | VAL | 101 | -16.760 | 4.785  | 13.022 | 1.00 | 0.03  |
| ATOM | 791 | HG13 | VAL | 101 | -16.788 | 7.262  | 13.172 | 1.00 | 0.02  |
| ATOM | 792 | HG12 | VAL | 101 | -18.437 | 6.678  | 12.867 | 1.00 | 0.02  |
| ATOM | 793 | HG11 | VAL | 101 | -17.483 | 7.381  | 11.529 | 1.00 | 0.02  |
| ATOM | 794 | HG23 | VAL | 101 | -18.053 | 5.159  | 10.239 | 1.00 | 0.02  |
| ATOM | 795 | HG22 | VAL | 101 | -18.881 | 4.537  | 11.695 | 1.00 | 0.02  |
| ATOM | 796 | HG21 | VAL | 101 | -17.587 | 3.585  | 10.945 | 1.00 | 0.02  |
| ATOM | 797 | N    | LEU | 102 | -13.835 | 5.581  | 13.237 | 1.00 | -0.26 |
| ATOM | 798 | CA   | LEU | 102 | -12.913 | 6.356  | 14.069 | 1.00 | 0.13  |
| ATOM | 799 | C    | LEU | 102 | -11.575 | 6.519  | 13.373 | 1.00 | 0.20  |
| ATOM | 800 | O    | LEU | 102 | -11.062 | 7.622  | 13.260 | 1.00 | -0.39 |
| ATOM | 801 | CB   | LEU | 102 | -12.720 | 5.666  | 15.450 | 1.00 | -0.01 |
| ATOM | 802 | CG   | LEU | 102 | -14.051 | 5.397  | 16.222 | 1.00 | -0.04 |
| ATOM | 803 | CD1  | LEU | 102 | -13.747 | 4.634  | 17.542 | 1.00 | -0.06 |
| ATOM | 804 | CD2  | LEU | 102 | -14.834 | 6.704  | 16.530 | 1.00 | -0.06 |
| ATOM | 805 | H    | LEU | 102 | -13.913 | 4.585  | 13.364 | 1.00 | 0.19  |
| ATOM | 806 | HA   | LEU | 102 | -13.298 | 7.374  | 14.246 | 1.00 | 0.08  |
| ATOM | 807 | HB2  | LEU | 102 | -12.058 | 6.292  | 16.070 | 1.00 | 0.03  |
| ATOM | 808 | HB1  | LEU | 102 | -12.214 | 4.701  | 15.290 | 1.00 | 0.03  |
| ATOM | 809 | HG   | LEU | 102 | -14.709 | 4.748  | 15.620 | 1.00 | 0.03  |
| ATOM | 810 | HD13 | LEU | 102 | -13.229 | 3.685  | 17.330 | 1.00 | 0.02  |
| ATOM | 811 | HD12 | LEU | 102 | -14.679 | 4.399  | 18.079 | 1.00 | 0.02  |
| ATOM | 812 | HD11 | LEU | 102 | -13.109 | 5.244  | 18.199 | 1.00 | 0.02  |
| ATOM | 813 | HD23 | LEU | 102 | -14.190 | 7.422  | 17.058 | 1.00 | 0.02  |
| ATOM | 814 | HD22 | LEU | 102 | -15.707 | 6.486  | 17.164 | 1.00 | 0.02  |
| ATOM | 815 | HD21 | LEU | 102 | -15.209 | 7.171  | 15.607 | 1.00 | 0.02  |
| ATOM | 816 | N    | THR | 103 | -10.967 | 5.412  | 12.905 | 1.00 | -0.26 |
| ATOM | 817 | CA   | THR | 103 | -9.614  | 5.473  | 12.361 | 1.00 | 0.16  |
| ATOM | 818 | C    | THR | 103 | -9.551  | 6.172  | 11.023 | 1.00 | 0.21  |
| ATOM | 819 | O    | THR | 103 | -8.709  | 7.040  | 10.856 | 1.00 | -0.39 |
| ATOM | 820 | CB   | THR | 103 | -9.026  | 4.038  | 12.225 | 1.00 | 0.09  |
| ATOM | 821 | OG1  | THR | 103 | -9.035  | 3.438  | 13.535 | 1.00 | -0.39 |

|      |     |         |     |         |        |        |      |       |
|------|-----|---------|-----|---------|--------|--------|------|-------|
| ATOM | 822 | CG2 THR | 103 | -7.587  | 4.040  | 11.650 | 1.00 | -0.03 |
| ATOM | 823 | H THR   | 103 | -11.417 | 4.520  | 12.956 | 1.00 | 0.19  |
| ATOM | 824 | HA THR  | 103 | -8.974  | 6.017  | 13.075 | 1.00 | 0.08  |
| ATOM | 825 | HB THR  | 103 | -9.661  | 3.455  | 11.534 | 1.00 | 0.06  |
| ATOM | 826 | HG1 THR | 103 | -8.751  | 2.530  | 13.537 | 1.00 | 0.21  |
| ATOM | 827 | HG22THR | 103 | -7.176  | 3.018  | 11.635 | 1.00 | 0.03  |
| ATOM | 828 | HG21THR | 103 | -6.928  | 4.675  | 12.262 | 1.00 | 0.03  |
| ATOM | 829 | HG23THR | 103 | -7.603  | 4.415  | 10.618 | 1.00 | 0.03  |
| ATOM | 830 | N LEU   | 104 | -10.386 | 5.814  | 10.023 | 1.00 | -0.26 |
| ATOM | 831 | CA LEU  | 104 | -10.149 | 6.371  | 8.691  | 1.00 | 0.13  |
| ATOM | 832 | C LEU   | 104 | -10.274 | 7.884  | 8.633  | 1.00 | 0.21  |
| ATOM | 833 | O LEU   | 104 | -9.351  | 8.493  | 8.108  | 1.00 | -0.39 |
| ATOM | 834 | CB LEU  | 104 | -10.954 | 5.686  | 7.552  | 1.00 | -0.01 |
| ATOM | 835 | CG LEU  | 104 | -10.710 | 4.153  | 7.398  | 1.00 | -0.04 |
| ATOM | 836 | CD1 LEU | 104 | -11.542 | 3.590  | 6.213  | 1.00 | -0.06 |
| ATOM | 837 | CD2 LEU | 104 | -9.215  | 3.796  | 7.189  | 1.00 | -0.06 |
| ATOM | 838 | H LEU   | 104 | -11.146 | 5.173  | 10.170 | 1.00 | 0.19  |
| ATOM | 839 | HA LEU  | 104 | -9.088  | 6.183  | 8.462  | 1.00 | 0.08  |
| ATOM | 840 | HB2 LEU | 104 | -10.653 | 6.169  | 6.611  | 1.00 | 0.03  |
| ATOM | 841 | HB1 LEU | 104 | -12.027 | 5.869  | 7.707  | 1.00 | 0.03  |
| ATOM | 842 | HG LEU  | 104 | -11.048 | 3.642  | 8.307  | 1.00 | 0.03  |
| ATOM | 843 | HD13LEU | 104 | -12.609 | 3.807  | 6.360  | 1.00 | 0.02  |
| ATOM | 844 | HD12LEU | 104 | -11.431 | 2.497  | 6.131  | 1.00 | 0.02  |
| ATOM | 845 | HD11LEU | 104 | -11.206 | 4.042  | 5.269  | 1.00 | 0.02  |
| ATOM | 846 | HD23LEU | 104 | -8.787  | 4.443  | 6.411  | 1.00 | 0.02  |
| ATOM | 847 | HD22LEU | 104 | -9.108  | 2.749  | 6.870  | 1.00 | 0.02  |
| ATOM | 848 | HD21LEU | 104 | -8.645  | 3.911  | 8.122  | 1.00 | 0.02  |
| ATOM | 849 | N PRO   | 105 | -11.323 | 8.593  | 9.124  | 1.00 | -0.25 |
| ATOM | 850 | CA PRO  | 105 | -11.269 | 10.041 | 9.046  | 1.00 | 0.13  |
| ATOM | 851 | C PRO   | 105 | -10.176 | 10.557 | 9.949  | 1.00 | 0.20  |
| ATOM | 852 | O PRO   | 105 | -9.609  | 11.582 | 9.613  | 1.00 | -0.39 |
| ATOM | 853 | CB PRO  | 105 | -12.693 | 10.432 | 9.494  | 1.00 | -0.01 |
| ATOM | 854 | CG PRO  | 105 | -13.134 | 9.263  | 10.399 | 1.00 | -0.03 |
| ATOM | 855 | CD PRO  | 105 | -12.485 | 7.999  | 9.776  | 1.00 | 0.04  |
| ATOM | 856 | HA PRO  | 105 | -11.091 | 10.389 | 8.018  | 1.00 | 0.08  |
| ATOM | 857 | HB2 PRO | 105 | -13.356 | 10.466 | 8.614  | 1.00 | 0.03  |
| ATOM | 858 | HB1 PRO | 105 | -12.728 | 11.409 | 10.000 | 1.00 | 0.03  |
| ATOM | 859 | HG1 PRO | 105 | -12.731 | 9.431  | 11.412 | 1.00 | 0.03  |
| ATOM | 860 | HG2 PRO | 105 | -14.233 | 9.203  | 10.461 | 1.00 | 0.03  |
| ATOM | 861 | HD1 PRO | 105 | -12.248 | 7.282  | 10.574 | 1.00 | 0.05  |
| ATOM | 862 | HD2 PRO | 105 | -13.157 | 7.538  | 9.038  | 1.00 | 0.05  |
| ATOM | 863 | N ALA   | 106 | -9.814  | 9.900  | 11.073 | 1.00 | -0.26 |
| ATOM | 864 | CA ALA  | 106 | -8.674  | 10.402 | 11.838 | 1.00 | 0.13  |
| ATOM | 865 | C ALA   | 106 | -7.431  | 10.323 | 10.978 | 1.00 | 0.20  |
| ATOM | 866 | O ALA   | 106 | -6.690  | 11.291 | 10.900 | 1.00 | -0.39 |
| ATOM | 867 | CB ALA  | 106 | -8.454  | 9.611  | 13.153 | 1.00 | -0.02 |
| ATOM | 868 | H ALA   | 106 | -10.255 | 9.047  | 11.362 | 1.00 | 0.19  |
| ATOM | 869 | HA ALA  | 106 | -8.856  | 11.458 | 12.101 | 1.00 | 0.08  |
| ATOM | 870 | HB3 ALA | 106 | -8.235  | 8.554  | 12.943 | 1.00 | 0.03  |
| ATOM | 871 | HB2 ALA | 106 | -9.356  | 9.668  | 13.781 | 1.00 | 0.03  |
| ATOM | 872 | HB1 ALA | 106 | -7.608  | 10.039 | 13.712 | 1.00 | 0.03  |
| ATOM | 873 | N LEU   | 107 | -7.177  | 9.183  | 10.301 | 1.00 | -0.26 |
| ATOM | 874 | CA LEU  | 107 | -6.008  | 9.117  | 9.425  | 1.00 | 0.13  |
| ATOM | 875 | C LEU   | 107 | -6.124  | 10.167 | 8.345  | 1.00 | 0.20  |
| ATOM | 876 | O LEU   | 107 | -5.183  | 10.911 | 8.121  | 1.00 | -0.39 |
| ATOM | 877 | CB LEU  | 107 | -5.855  | 7.746  | 8.710  | 1.00 | -0.01 |
| ATOM | 878 | CG LEU  | 107 | -5.521  | 6.541  | 9.635  | 1.00 | -0.04 |
| ATOM | 879 | CD1 LEU | 107 | -5.562  | 5.239  | 8.786  | 1.00 | -0.06 |

|      |     |         |     |         |        |        |      |       |
|------|-----|---------|-----|---------|--------|--------|------|-------|
| ATOM | 880 | CD2 LEU | 107 | -4.135  | 6.674  | 10.324 | 1.00 | -0.06 |
| ATOM | 881 | H LEU   | 107 | -7.804  | 8.399  | 10.357 | 1.00 | 0.19  |
| ATOM | 882 | HA LEU  | 107 | -5.103  | 9.352  | 10.003 | 1.00 | 0.08  |
| ATOM | 883 | HB2 LEU | 107 | -5.053  | 7.822  | 7.966  | 1.00 | 0.03  |
| ATOM | 884 | HB1 LEU | 107 | -6.791  | 7.543  | 8.167  | 1.00 | 0.03  |
| ATOM | 885 | HG LEU  | 107 | -6.282  | 6.473  | 10.426 | 1.00 | 0.03  |
| ATOM | 886 | HD13LEU | 107 | -6.543  | 5.137  | 8.304  | 1.00 | 0.02  |
| ATOM | 887 | HD12LEU | 107 | -5.398  | 4.350  | 9.410  | 1.00 | 0.02  |
| ATOM | 888 | HD11LEU | 107 | -4.792  | 5.267  | 8.001  | 1.00 | 0.02  |
| ATOM | 889 | HD23LEU | 107 | -3.341  | 6.819  | 9.575  | 1.00 | 0.02  |
| ATOM | 890 | HD22LEU | 107 | -3.913  | 5.766  | 10.904 | 1.00 | 0.02  |
| ATOM | 891 | HD21LEU | 107 | -4.118  | 7.515  | 11.027 | 1.00 | 0.02  |
| ATOM | 892 | N ILE   | 108 | -7.268  | 10.260 | 7.639  | 1.00 | -0.26 |
| ATOM | 893 | CA ILE  | 108 | -7.359  | 11.271 | 6.584  | 1.00 | 0.13  |
| ATOM | 894 | C ILE   | 108 | -7.244  | 12.658 | 7.175  | 1.00 | 0.20  |
| ATOM | 895 | O ILE   | 108 | -6.661  | 13.521 | 6.539  | 1.00 | -0.39 |
| ATOM | 896 | CB ILE  | 108 | -8.612  | 11.036 | 5.698  | 1.00 | 0.00  |
| ATOM | 897 | CG1 ILE | 108 | -8.391  | 9.758  | 4.830  | 1.00 | -0.05 |
| ATOM | 898 | CG2 ILE | 108 | -8.932  | 12.271 | 4.812  | 1.00 | -0.06 |
| ATOM | 899 | CD1 ILE | 108 | -9.716  | 9.002  | 4.577  | 1.00 | -0.06 |
| ATOM | 900 | H ILE   | 108 | -8.055  | 9.668  | 7.850  | 1.00 | 0.19  |
| ATOM | 901 | HA ILE  | 108 | -6.488  | 11.163 | 5.924  | 1.00 | 0.08  |
| ATOM | 902 | HB ILE  | 108 | -9.468  | 10.897 | 6.374  | 1.00 | 0.03  |
| ATOM | 903 | HG12ILE | 108 | -7.712  | 9.045  | 5.329  | 1.00 | 0.03  |
| ATOM | 904 | HG11ILE | 108 | -7.924  | 10.034 | 3.870  | 1.00 | 0.03  |
| ATOM | 905 | HG23ILE | 108 | -9.197  | 13.129 | 5.448  | 1.00 | 0.02  |
| ATOM | 906 | HG22ILE | 108 | -9.783  | 12.069 | 4.144  | 1.00 | 0.02  |
| ATOM | 907 | HG21ILE | 108 | -8.059  | 12.542 | 4.199  | 1.00 | 0.02  |
| ATOM | 908 | HD13ILE | 108 | -10.036 | 8.537  | 5.521  | 1.00 | 0.02  |
| ATOM | 909 | HD12ILE | 108 | -9.569  | 8.212  | 3.824  | 1.00 | 0.02  |
| ATOM | 910 | HD11ILE | 108 | -10.506 | 9.685  | 4.237  | 1.00 | 0.02  |
| ATOM | 911 | N PHE   | 109 | -7.746  | 12.916 | 8.399  | 1.00 | -0.26 |
| ATOM | 912 | CA PHE  | 109 | -7.451  | 14.198 | 9.029  | 1.00 | 0.14  |
| ATOM | 913 | C PHE   | 109 | -5.957  | 14.291 | 9.232  | 1.00 | 0.21  |
| ATOM | 914 | O PHE   | 109 | -5.400  | 15.332 | 8.922  | 1.00 | -0.39 |
| ATOM | 915 | CB PHE  | 109 | -8.179  | 14.391 | 10.384 | 1.00 | 0.02  |
| ATOM | 916 | CG PHE  | 109 | -9.715  | 14.293 | 10.324 | 1.00 | -0.04 |
| ATOM | 917 | CD1 PHE | 109 | -10.446 | 14.306 | 9.127  | 1.00 | -0.06 |
| ATOM | 918 | CD2 PHE | 109 | -10.410 | 14.180 | 11.534 | 1.00 | -0.06 |
| ATOM | 919 | CE1 PHE | 109 | -11.841 | 14.228 | 9.145  | 1.00 | -0.07 |
| ATOM | 920 | CE2 PHE | 109 | -11.805 | 14.094 | 11.556 | 1.00 | -0.07 |
| ATOM | 921 | CZ PHE  | 109 | -12.524 | 14.130 | 10.359 | 1.00 | -0.07 |
| ATOM | 922 | H PHE   | 109 | -8.245  | 12.220 | 8.921  | 1.00 | 0.19  |
| ATOM | 923 | HA PHE  | 109 | -7.731  | 15.022 | 8.351  | 1.00 | 0.08  |
| ATOM | 924 | HB2 PHE | 109 | -7.921  | 15.381 | 10.793 | 1.00 | 0.05  |
| ATOM | 925 | HB1 PHE | 109 | -7.808  | 13.626 | 11.082 | 1.00 | 0.05  |
| ATOM | 926 | HD1 PHE | 109 | -9.954  | 14.373 | 8.164  | 1.00 | 0.06  |
| ATOM | 927 | HD2 PHE | 109 | -9.864  | 14.159 | 12.472 | 1.00 | 0.06  |
| ATOM | 928 | HE1 PHE | 109 | -12.397 | 14.242 | 8.212  | 1.00 | 0.06  |
| ATOM | 929 | HE2 PHE | 109 | -12.329 | 14.001 | 12.502 | 1.00 | 0.06  |
| ATOM | 930 | HZ PHE  | 109 | -13.609 | 14.079 | 10.373 | 1.00 | 0.06  |
| ATOM | 931 | N TYR   | 110 | -5.259  | 13.237 | 9.709  | 1.00 | -0.26 |
| ATOM | 932 | CA TYR  | 110 | -3.799  | 13.329 | 9.771  | 1.00 | 0.14  |
| ATOM | 933 | C TYR   | 110 | -3.252  | 13.591 | 8.384  | 1.00 | 0.21  |
| ATOM | 934 | O TYR   | 110 | -2.288  | 14.325 | 8.250  | 1.00 | -0.39 |
| ATOM | 935 | CB TYR  | 110 | -3.102  | 12.056 | 10.323 | 1.00 | 0.02  |
| ATOM | 936 | CG TYR  | 110 | -3.660  | 11.509 | 11.648 | 1.00 | -0.05 |
| ATOM | 937 | CD1 TYR | 110 | -4.474  | 12.262 | 12.504 | 1.00 | -0.07 |

|      |     |         |     |         |        |        |      |       |
|------|-----|---------|-----|---------|--------|--------|------|-------|
| ATOM | 938 | CD2 TYR | 110 | -3.336  | 10.195 | 12.008 | 1.00 | -0.07 |
| ATOM | 939 | CE1 TYR | 110 | -5.023  | 11.683 | 13.652 | 1.00 | -0.04 |
| ATOM | 940 | CE2 TYR | 110 | -3.877  | 9.618  | 13.159 | 1.00 | -0.04 |
| ATOM | 941 | CZ TYR  | 110 | -4.729  | 10.355 | 13.985 | 1.00 | 0.08  |
| ATOM | 942 | OH TYR  | 110 | -5.266  | 9.752  | 15.126 | 1.00 | -0.34 |
| ATOM | 943 | H TYR   | 110 | -5.713  | 12.377 | 9.965  | 1.00 | 0.19  |
| ATOM | 944 | HA TYR  | 110 | -3.521  | 14.190 | 10.399 | 1.00 | 0.08  |
| ATOM | 945 | HB1 TYR | 110 | -2.034  | 12.273 | 10.477 | 1.00 | 0.05  |
| ATOM | 946 | HB2 TYR | 110 | -3.180  | 11.259 | 9.567  | 1.00 | 0.05  |
| ATOM | 947 | HD1 TYR | 110 | -4.696  | 13.302 | 12.293 | 1.00 | 0.05  |
| ATOM | 948 | HD2 TYR | 110 | -2.658  | 9.615  | 11.390 | 1.00 | 0.05  |
| ATOM | 949 | HE1 TYR | 110 | -5.681  | 12.274 | 14.280 | 1.00 | 0.05  |
| ATOM | 950 | HE2 TYR | 110 | -3.638  | 8.592  | 13.420 | 1.00 | 0.05  |
| ATOM | 951 | HH TYR  | 110 | -5.686  | 10.360 | 15.723 | 1.00 | 0.25  |
| ATOM | 952 | N TYR   | 111 | -3.844  | 13.024 | 7.311  | 1.00 | -0.26 |
| ATOM | 953 | CA TYR  | 111 | -3.363  | 13.353 | 5.969  | 1.00 | 0.14  |
| ATOM | 954 | C TYR   | 111 | -3.535  | 14.823 | 5.652  | 1.00 | 0.21  |
| ATOM | 955 | O TYR   | 111 | -2.953  | 15.265 | 4.675  | 1.00 | -0.39 |
| ATOM | 956 | CB TYR  | 111 | -3.977  | 12.476 | 4.845  | 1.00 | 0.02  |
| ATOM | 957 | CG TYR  | 111 | -3.911  | 10.956 | 5.091  | 1.00 | -0.05 |
| ATOM | 958 | CD1 TYR | 111 | -3.174  | 10.380 | 6.134  | 1.00 | -0.07 |
| ATOM | 959 | CD2 TYR | 111 | -4.631  | 10.112 | 4.236  | 1.00 | -0.07 |
| ATOM | 960 | CE1 TYR | 111 | -3.237  | 9.006  | 6.376  | 1.00 | -0.04 |
| ATOM | 961 | CE2 TYR | 111 | -4.658  | 8.730  | 4.447  | 1.00 | -0.04 |
| ATOM | 962 | CZ TYR  | 111 | -3.954  | 8.170  | 5.516  | 1.00 | 0.08  |
| ATOM | 963 | OH TYR  | 111 | -3.980  | 6.790  | 5.717  | 1.00 | -0.34 |
| ATOM | 964 | H TYR   | 111 | -4.623  | 12.401 | 7.420  | 1.00 | 0.19  |
| ATOM | 965 | HA TYR  | 111 | -2.276  | 13.199 | 5.944  | 1.00 | 0.08  |
| ATOM | 966 | HB1 TYR | 111 | -3.461  | 12.685 | 3.895  | 1.00 | 0.05  |
| ATOM | 967 | HB2 TYR | 111 | -5.031  | 12.770 | 4.726  | 1.00 | 0.05  |
| ATOM | 968 | HD1 TYR | 111 | -2.546  | 10.977 | 6.782  | 1.00 | 0.05  |
| ATOM | 969 | HD2 TYR | 111 | -5.181  | 10.532 | 3.399  | 1.00 | 0.05  |
| ATOM | 970 | HE1 TYR | 111 | -2.730  | 8.592  | 7.240  | 1.00 | 0.05  |
| ATOM | 971 | HE2 TYR | 111 | -5.226  | 8.088  | 3.783  | 1.00 | 0.05  |
| ATOM | 972 | HH TYR  | 111 | -3.130  | 6.430  | 5.961  | 1.00 | 0.25  |
| ATOM | 973 | N PHE   | 112 | -4.289  | 15.613 | 6.451  | 1.00 | -0.26 |
| ATOM | 974 | CA PHE  | 112 | -4.244  | 17.066 | 6.322  | 1.00 | 0.14  |
| ATOM | 975 | C PHE   | 112 | -3.228  | 17.657 | 7.284  | 1.00 | 0.20  |
| ATOM | 976 | O PHE   | 112 | -3.405  | 18.808 | 7.657  | 1.00 | -0.39 |
| ATOM | 977 | CB PHE  | 112 | -5.653  | 17.661 | 6.612  | 1.00 | 0.02  |
| ATOM | 978 | CG PHE  | 112 | -6.828  | 16.960 | 5.903  | 1.00 | -0.04 |
| ATOM | 979 | CD1 PHE | 112 | -6.669  | 16.223 | 4.722  | 1.00 | -0.06 |
| ATOM | 980 | CD2 PHE | 112 | -8.108  | 17.068 | 6.461  | 1.00 | -0.06 |
| ATOM | 981 | CE1 PHE | 112 | -7.768  | 15.606 | 4.116  | 1.00 | -0.07 |
| ATOM | 982 | CE2 PHE | 112 | -9.210  | 16.456 | 5.856  | 1.00 | -0.07 |
| ATOM | 983 | CZ PHE  | 112 | -9.043  | 15.733 | 4.673  | 1.00 | -0.07 |
| ATOM | 984 | H PHE   | 112 | -4.821  | 15.250 | 7.215  | 1.00 | 0.19  |
| ATOM | 985 | HA PHE  | 112 | -3.931  | 17.384 | 5.314  | 1.00 | 0.08  |
| ATOM | 986 | HB2 PHE | 112 | -5.677  | 18.728 | 6.340  | 1.00 | 0.05  |
| ATOM | 987 | HB1 PHE | 112 | -5.821  | 17.585 | 7.699  | 1.00 | 0.05  |
| ATOM | 988 | HD1 PHE | 112 | -5.697  | 16.119 | 4.255  | 1.00 | 0.06  |
| ATOM | 989 | HD2 PHE | 112 | -8.257  | 17.634 | 7.375  | 1.00 | 0.06  |
| ATOM | 990 | HE1 PHE | 112 | -7.630  | 15.024 | 3.210  | 1.00 | 0.06  |
| ATOM | 991 | HE2 PHE | 112 | -10.195 | 16.544 | 6.305  | 1.00 | 0.06  |
| ATOM | 992 | HZ PHE  | 112 | -9.899  | 15.272 | 4.192  | 1.00 | 0.06  |
| ATOM | 993 | N ASN   | 113 | -2.172  | 16.928 | 7.723  | 1.00 | -0.29 |
| ATOM | 994 | CA ASN  | 113 | -1.180  | 17.493 | 8.638  | 1.00 | 0.02  |
| ATOM | 995 | C ASN   | 113 | 0.196   | 17.097 | 8.165  | 1.00 | -0.19 |

|      |      |      |     |     |        |        |        |      |       |
|------|------|------|-----|-----|--------|--------|--------|------|-------|
| ATOM | 996  | O    | ASN | 113 | 1.036  | 16.624 | 8.917  | 1.00 | -0.72 |
| ATOM | 997  | CB   | ASN | 113 | -1.418 | 16.988 | 10.086 | 1.00 | 0.05  |
| ATOM | 998  | CG   | ASN | 113 | -2.806 | 17.187 | 10.656 | 1.00 | 0.18  |
| ATOM | 999  | OD1  | ASN | 113 | -3.188 | 16.423 | 11.529 | 1.00 | -0.40 |
| ATOM | 1000 | ND2  | ASN | 113 | -3.614 | 18.186 | 10.246 | 1.00 | -0.30 |
| ATOM | 1001 | H    | ASN | 113 | -2.042 | 15.962 | 7.485  | 1.00 | 0.19  |
| ATOM | 1002 | HA   | ASN | 113 | -1.167 | 18.594 | 8.618  | 1.00 | 0.05  |
| ATOM | 1003 | HB2  | ASN | 113 | -0.698 | 17.472 | 10.762 | 1.00 | 0.05  |
| ATOM | 1004 | HB1  | ASN | 113 | -1.213 | 15.906 | 10.094 | 1.00 | 0.05  |
| ATOM | 1005 | HD21 | ASN | 113 | -3.350 | 18.839 | 9.536  | 1.00 | 0.18  |
| ATOM | 1006 | HD22 | ASN | 113 | -4.524 | 18.254 | 10.652 | 1.00 | 0.18  |
| TER  | 1007 |      | ASN | 113 |        |        |        |      |       |
| ATOM | 1008 | C    | ACE | 124 | 7.987  | 11.294 | 4.878  | 1.00 | 0.18  |
| ATOM | 1009 | O    | ACE | 124 | 6.873  | 10.823 | 4.721  | 1.00 | -0.40 |
| ATOM | 1010 | CH3  | ACE | 124 | 8.110  | 12.757 | 5.213  | 1.00 | 0.03  |
| ATOM | 1011 | H    | ACE | 124 | 7.176  | 13.286 | 4.968  | 1.00 | 0.05  |
| ATOM | 1012 | H    | ACE | 124 | 8.934  | 13.218 | 4.647  | 1.00 | 0.05  |
| ATOM | 1013 | H    | ACE | 124 | 8.306  | 12.864 | 6.289  | 1.00 | 0.05  |
| ATOM | 1014 | N    | LYS | 125 | 9.100  | 10.530 | 4.781  | 1.00 | -0.27 |
| ATOM | 1015 | CA   | LYS | 125 | 8.946  | 9.096  | 4.532  | 1.00 | 0.13  |
| ATOM | 1016 | C    | LYS | 125 | 8.126  | 8.515  | 5.661  | 1.00 | 0.20  |
| ATOM | 1017 | O    | LYS | 125 | 7.124  | 7.876  | 5.394  | 1.00 | -0.39 |
| ATOM | 1018 | CB   | LYS | 125 | 10.280 | 8.291  | 4.471  | 1.00 | -0.01 |
| ATOM | 1019 | CG   | LYS | 125 | 10.022 | 6.769  | 4.228  | 1.00 | -0.04 |
| ATOM | 1020 | CD   | LYS | 125 | 11.086 | 5.832  | 4.870  | 1.00 | -0.01 |
| ATOM | 1021 | CE   | LYS | 125 | 10.582 | 4.359  | 4.867  | 1.00 | -0.04 |
| ATOM | 1022 | NZ   | LYS | 125 | 11.503 | 3.421  | 5.549  | 1.00 | 0.22  |
| ATOM | 1023 | H    | LYS | 125 | 10.014 | 10.912 | 4.926  | 1.00 | 0.19  |
| ATOM | 1024 | HA   | LYS | 125 | 8.404  | 8.950  | 3.582  | 1.00 | 0.08  |
| ATOM | 1025 | HB2  | LYS | 125 | 10.811 | 8.438  | 5.423  | 1.00 | 0.03  |
| ATOM | 1026 | HB1  | LYS | 125 | 10.926 | 8.691  | 3.672  | 1.00 | 0.03  |
| ATOM | 1027 | HG2  | LYS | 125 | 9.943  | 6.570  | 3.147  | 1.00 | 0.03  |
| ATOM | 1028 | HG1  | LYS | 125 | 9.066  | 6.473  | 4.677  | 1.00 | 0.03  |
| ATOM | 1029 | HD2  | LYS | 125 | 11.254 | 6.128  | 5.918  | 1.00 | 0.03  |
| ATOM | 1030 | HD1  | LYS | 125 | 12.043 | 5.919  | 4.328  | 1.00 | 0.03  |
| ATOM | 1031 | HE2  | LYS | 125 | 10.421 | 4.033  | 3.826  | 1.00 | 0.08  |
| ATOM | 1032 | HE1  | LYS | 125 | 9.614  | 4.307  | 5.396  | 1.00 | 0.08  |
| ATOM | 1033 | HZ3  | LYS | 125 | 12.425 | 3.219  | 5.022  | 1.00 | 0.20  |
| ATOM | 1034 | HZ2  | LYS | 125 | 11.049 | 2.439  | 5.648  | 1.00 | 0.20  |
| ATOM | 1035 | HZ1  | LYS | 125 | 11.829 | 3.754  | 6.521  | 1.00 | 0.20  |
| ATOM | 1036 | N    | LEU | 126 | 8.533  | 8.689  | 6.936  | 1.00 | -0.26 |
| ATOM | 1037 | CA   | LEU | 126 | 7.793  | 8.026  | 8.005  | 1.00 | 0.13  |
| ATOM | 1038 | C    | LEU | 126 | 6.365  | 8.509  | 8.001  | 1.00 | 0.20  |
| ATOM | 1039 | O    | LEU | 126 | 5.476  | 7.698  | 8.189  | 1.00 | -0.39 |
| ATOM | 1040 | CB   | LEU | 126 | 8.411  | 8.244  | 9.413  | 1.00 | -0.01 |
| ATOM | 1041 | CG   | LEU | 126 | 9.848  | 7.662  | 9.587  | 1.00 | -0.04 |
| ATOM | 1042 | CD1  | LEU | 126 | 10.328 | 7.909  | 11.045 | 1.00 | -0.06 |
| ATOM | 1043 | CD2  | LEU | 126 | 9.911  | 6.142  | 9.263  | 1.00 | -0.06 |
| ATOM | 1044 | H    | LEU | 126 | 9.318  | 9.265  | 7.160  | 1.00 | 0.19  |
| ATOM | 1045 | HA   | LEU | 126 | 7.744  | 6.946  | 7.795  | 1.00 | 0.08  |
| ATOM | 1046 | HB2  | LEU | 126 | 7.750  | 7.768  | 10.155 | 1.00 | 0.03  |
| ATOM | 1047 | HB1  | LEU | 126 | 8.424  | 9.327  | 9.620  | 1.00 | 0.03  |
| ATOM | 1048 | HG   | LEU | 126 | 10.551 | 8.184  | 8.916  | 1.00 | 0.03  |
| ATOM | 1049 | HD13 | LEU | 126 | 10.297 | 8.983  | 11.286 | 1.00 | 0.02  |
| ATOM | 1050 | HD12 | LEU | 126 | 11.364 | 7.561  | 11.178 | 1.00 | 0.02  |
| ATOM | 1051 | HD11 | LEU | 126 | 9.685  | 7.371  | 11.758 | 1.00 | 0.02  |
| ATOM | 1052 | HD23 | LEU | 126 | 9.103  | 5.616  | 9.792  | 1.00 | 0.02  |
| ATOM | 1053 | HD22 | LEU | 126 | 10.875 | 5.717  | 9.582  | 1.00 | 0.02  |

|      |      |         |     |       |        |        |      |       |
|------|------|---------|-----|-------|--------|--------|------|-------|
| ATOM | 1054 | HD21LEU | 126 | 9.813 | 5.952  | 8.184  | 1.00 | 0.02  |
| ATOM | 1055 | N GLN   | 127 | 6.092 | 9.809  | 7.780  | 1.00 | -0.26 |
| ATOM | 1056 | CA GLN  | 127 | 4.696 | 10.243 | 7.755  | 1.00 | 0.13  |
| ATOM | 1057 | C GLN   | 127 | 3.967 | 9.555  | 6.618  | 1.00 | 0.20  |
| ATOM | 1058 | O GLN   | 127 | 2.924 | 8.957  | 6.841  | 1.00 | -0.39 |
| ATOM | 1059 | CB GLN  | 127 | 4.628 | 11.791 | 7.639  | 1.00 | 0.00  |
| ATOM | 1060 | CG GLN  | 127 | 3.177 | 12.325 | 7.733  | 1.00 | 0.04  |
| ATOM | 1061 | CD GLN  | 127 | 3.157 | 13.835 | 7.706  | 1.00 | 0.17  |
| ATOM | 1062 | OE1 GLN | 127 | 3.950 | 14.408 | 6.978  | 1.00 | -0.40 |
| ATOM | 1063 | NE2 GLN | 127 | 2.276 | 14.512 | 8.471  | 1.00 | -0.30 |
| ATOM | 1064 | H GLN   | 127 | 6.825 | 10.467 | 7.601  | 1.00 | 0.19  |
| ATOM | 1065 | HA GLN  | 127 | 4.218 | 9.943  | 8.704  | 1.00 | 0.08  |
| ATOM | 1066 | HB2 GLN | 127 | 5.084 | 12.111 | 6.688  | 1.00 | 0.03  |
| ATOM | 1067 | HB1 GLN | 127 | 5.210 | 12.233 | 8.464  | 1.00 | 0.03  |
| ATOM | 1068 | HG2 GLN | 127 | 2.702 | 11.949 | 8.652  | 1.00 | 0.05  |
| ATOM | 1069 | HG1 GLN | 127 | 2.612 | 11.958 | 6.864  | 1.00 | 0.05  |
| ATOM | 1070 | HE21GLN | 127 | 1.633 | 14.067 | 9.089  | 1.00 | 0.18  |
| ATOM | 1071 | HE22GLN | 127 | 2.214 | 15.519 | 8.433  | 1.00 | 0.18  |
| ATOM | 1072 | N ARG   | 128 | 4.500 | 9.612  | 5.377  | 1.00 | -0.26 |
| ATOM | 1073 | CA ARG  | 128 | 3.820 | 8.943  | 4.266  | 1.00 | 0.13  |
| ATOM | 1074 | C ARG   | 128 | 3.705 | 7.452  | 4.524  | 1.00 | 0.20  |
| ATOM | 1075 | O ARG   | 128 | 2.674 | 6.855  | 4.248  | 1.00 | -0.39 |
| ATOM | 1076 | CB ARG  | 128 | 4.602 | 9.147  | 2.932  | 1.00 | -0.01 |
| ATOM | 1077 | CG ARG  | 128 | 3.894 | 8.452  | 1.734  | 1.00 | -0.02 |
| ATOM | 1078 | CD ARG  | 128 | 4.760 | 8.379  | 0.449  | 1.00 | 0.06  |
| ATOM | 1079 | NE ARG  | 128 | 4.013 | 7.662  | -0.597 | 1.00 | -0.27 |
| ATOM | 1080 | CZ ARG  | 128 | 3.895 | 6.351  | -0.684 | 1.00 | 0.29  |
| ATOM | 1081 | NH1 ARG | 128 | 4.427 | 5.513  | 0.170  | 1.00 | -0.28 |
| ATOM | 1082 | NH2 ARG | 128 | 3.205 | 5.845  | -1.676 | 1.00 | -0.28 |
| ATOM | 1083 | H ARG   | 128 | 5.375 | 10.082 | 5.209  | 1.00 | 0.19  |
| ATOM | 1084 | HA ARG  | 128 | 2.809 | 9.369  | 4.159  | 1.00 | 0.08  |
| ATOM | 1085 | HB2 ARG | 128 | 5.618 | 8.743  | 3.052  | 1.00 | 0.03  |
| ATOM | 1086 | HB1 ARG | 128 | 4.700 | 10.226 | 2.721  | 1.00 | 0.03  |
| ATOM | 1087 | HG2 ARG | 128 | 2.975 | 9.015  | 1.511  | 1.00 | 0.03  |
| ATOM | 1088 | HG1 ARG | 128 | 3.608 | 7.425  | 1.991  | 1.00 | 0.03  |
| ATOM | 1089 | HD2 ARG | 128 | 5.754 | 7.942  | 0.631  | 1.00 | 0.07  |
| ATOM | 1090 | HD1 ARG | 128 | 4.943 | 9.419  | 0.131  | 1.00 | 0.07  |
| ATOM | 1091 | HE ARG  | 128 | 3.558 | 8.250  | -1.312 | 1.00 | 0.26  |
| ATOM | 1092 | HH11ARG | 128 | 4.982 | 5.830  | 0.966  | 1.00 | 0.26  |
| ATOM | 1093 | HH12ARG | 128 | 4.288 | 4.491  | 0.070  | 1.00 | 0.26  |
| ATOM | 1094 | HH21ARG | 128 | 2.758 | 6.444  | -2.380 | 1.00 | 0.26  |
| ATOM | 1095 | HH22ARG | 128 | 3.090 | 4.825  | -1.780 | 1.00 | 0.26  |
| ATOM | 1096 | N PHE   | 129 | 4.779 | 6.810  | 5.025  | 1.00 | -0.26 |
| ATOM | 1097 | CA PHE  | 129 | 4.758 | 5.357  | 5.174  | 1.00 | 0.14  |
| ATOM | 1098 | C PHE   | 129 | 3.866 | 5.010  | 6.339  | 1.00 | 0.21  |
| ATOM | 1099 | O PHE   | 129 | 3.118 | 4.057  | 6.218  | 1.00 | -0.39 |
| ATOM | 1100 | CB PHE  | 129 | 6.165 | 4.725  | 5.362  | 1.00 | 0.02  |
| ATOM | 1101 | CG PHE  | 129 | 6.920 | 4.561  | 4.028  | 1.00 | -0.04 |
| ATOM | 1102 | CD1 PHE | 129 | 6.986 | 5.600  | 3.092  | 1.00 | -0.06 |
| ATOM | 1103 | CD2 PHE | 129 | 7.557 | 3.351  | 3.726  | 1.00 | -0.06 |
| ATOM | 1104 | CE1 PHE | 129 | 7.652 | 5.435  | 1.876  | 1.00 | -0.07 |
| ATOM | 1105 | CE2 PHE | 129 | 8.193 | 3.163  | 2.495  | 1.00 | -0.07 |
| ATOM | 1106 | CZ PHE  | 129 | 8.240 | 4.208  | 1.570  | 1.00 | -0.07 |
| ATOM | 1107 | H PHE   | 129 | 5.584 | 7.323  | 5.330  | 1.00 | 0.19  |
| ATOM | 1108 | HA PHE  | 129 | 4.315 | 4.899  | 4.274  | 1.00 | 0.08  |
| ATOM | 1109 | HB2 PHE | 129 | 6.023 | 3.728  | 5.812  | 1.00 | 0.05  |
| ATOM | 1110 | HB1 PHE | 129 | 6.772 | 5.317  | 6.062  | 1.00 | 0.05  |
| ATOM | 1111 | HD1 PHE | 129 | 6.525 | 6.553  | 3.291  | 1.00 | 0.06  |

|      |      |         |     |        |        |        |      |       |
|------|------|---------|-----|--------|--------|--------|------|-------|
| ATOM | 1112 | HD2 PHE | 129 | 7.565  | 2.543  | 4.448  | 1.00 | 0.06  |
| ATOM | 1113 | HE1 PHE | 129 | 7.715  | 6.257  | 1.169  | 1.00 | 0.06  |
| ATOM | 1114 | HE2 PHE | 129 | 8.650  | 2.206  | 2.264  | 1.00 | 0.06  |
| ATOM | 1115 | HZ PHE  | 129 | 8.728  | 4.078  | 0.614  | 1.00 | 0.06  |
| ATOM | 1116 | N ILE   | 130 | 3.893  | 5.746  | 7.467  | 1.00 | -0.26 |
| ATOM | 1117 | CA ILE  | 130 | 2.943  | 5.457  | 8.541  | 1.00 | 0.13  |
| ATOM | 1118 | C ILE   | 130 | 1.552  | 5.637  | 7.977  | 1.00 | 0.20  |
| ATOM | 1119 | O ILE   | 130 | 0.747  | 4.723  | 8.085  | 1.00 | -0.39 |
| ATOM | 1120 | CB ILE  | 130 | 3.194  | 6.341  | 9.802  | 1.00 | 0.00  |
| ATOM | 1121 | CG1 ILE | 130 | 4.513  | 5.893  | 10.507 | 1.00 | -0.05 |
| ATOM | 1122 | CG2 ILE | 130 | 1.982  | 6.270  | 10.774 | 1.00 | -0.06 |
| ATOM | 1123 | CD1 ILE | 130 | 5.082  | 6.947  | 11.495 | 1.00 | -0.06 |
| ATOM | 1124 | H ILE   | 130 | 4.507  | 6.533  | 7.550  | 1.00 | 0.19  |
| ATOM | 1125 | HA ILE  | 130 | 3.045  | 4.402  | 8.842  | 1.00 | 0.08  |
| ATOM | 1126 | HB ILE  | 130 | 3.288  | 7.391  | 9.478  | 1.00 | 0.03  |
| ATOM | 1127 | HG12ILE | 130 | 5.295  | 5.690  | 9.757  | 1.00 | 0.03  |
| ATOM | 1128 | HG11ILE | 130 | 4.330  | 4.955  | 11.051 | 1.00 | 0.03  |
| ATOM | 1129 | HG23ILE | 130 | 1.090  | 6.710  | 10.303 | 1.00 | 0.02  |
| ATOM | 1130 | HG22ILE | 130 | 2.167  | 6.830  | 11.700 | 1.00 | 0.02  |
| ATOM | 1131 | HG21ILE | 130 | 1.766  | 5.223  | 11.034 | 1.00 | 0.02  |
| ATOM | 1132 | HD13ILE | 130 | 5.243  | 7.907  | 10.980 | 1.00 | 0.02  |
| ATOM | 1133 | HD12ILE | 130 | 6.048  | 6.598  | 11.893 | 1.00 | 0.02  |
| ATOM | 1134 | HD11ILE | 130 | 4.408  | 7.113  | 12.347 | 1.00 | 0.02  |
| ATOM | 1135 | N PHE   | 131 | 1.255  | 6.801  | 7.355  | 1.00 | -0.26 |
| ATOM | 1136 | CA PHE  | 131 | -0.074 | 6.993  | 6.774  | 1.00 | 0.14  |
| ATOM | 1137 | C PHE   | 131 | -0.505 | 5.806  | 5.940  | 1.00 | 0.21  |
| ATOM | 1138 | O PHE   | 131 | -1.676 | 5.458  | 5.976  | 1.00 | -0.39 |
| ATOM | 1139 | CB PHE  | 131 | -0.104 | 8.189  | 5.780  | 1.00 | 0.02  |
| ATOM | 1140 | CG PHE  | 131 | 0.003  | 9.607  | 6.355  | 1.00 | -0.04 |
| ATOM | 1141 | CD1 PHE | 131 | 0.033  | 9.896  | 7.725  | 1.00 | -0.06 |
| ATOM | 1142 | CD2 PHE | 131 | 0.064  | 10.661 | 5.435  | 1.00 | -0.06 |
| ATOM | 1143 | CE1 PHE | 131 | 0.004  | 11.225 | 8.161  | 1.00 | -0.07 |
| ATOM | 1144 | CE2 PHE | 131 | 0.075  | 11.988 | 5.868  | 1.00 | -0.07 |
| ATOM | 1145 | CZ PHE  | 131 | -0.007 | 12.270 | 7.233  | 1.00 | -0.07 |
| ATOM | 1146 | H PHE   | 131 | 1.932  | 7.543  | 7.276  | 1.00 | 0.19  |
| ATOM | 1147 | HA PHE  | 131 | -0.815 | 7.106  | 7.581  | 1.00 | 0.08  |
| ATOM | 1148 | HB2 PHE | 131 | -1.034 | 8.164  | 5.190  | 1.00 | 0.05  |
| ATOM | 1149 | HB1 PHE | 131 | 0.729  | 8.072  | 5.078  | 1.00 | 0.05  |
| ATOM | 1150 | HD1 PHE | 131 | 0.076  | 9.107  | 8.466  | 1.00 | 0.06  |
| ATOM | 1151 | HD2 PHE | 131 | 0.098  | 10.453 | 4.370  | 1.00 | 0.06  |
| ATOM | 1152 | HE1 PHE | 131 | -0.006 | 11.446 | 9.223  | 1.00 | 0.06  |
| ATOM | 1153 | HE2 PHE | 131 | 0.143  | 12.797 | 5.148  | 1.00 | 0.06  |
| ATOM | 1154 | HZ PHE  | 131 | -0.075 | 13.300 | 7.564  | 1.00 | 0.06  |
| ATOM | 1155 | N HIS   | 132 | 0.414  | 5.198  | 5.160  | 1.00 | -0.26 |
| ATOM | 1156 | CA HIS  | 132 | 0.022  | 4.067  | 4.320  | 1.00 | 0.14  |
| ATOM | 1157 | C HIS   | 132 | -0.008 | 2.797  | 5.151  | 1.00 | 0.21  |
| ATOM | 1158 | O HIS   | 132 | -0.970 | 2.050  | 5.075  | 1.00 | -0.39 |
| ATOM | 1159 | CB HIS  | 132 | 0.985  | 3.901  | 3.113  | 1.00 | 0.04  |
| ATOM | 1160 | CG HIS  | 132 | 0.842  | 4.983  | 2.065  | 1.00 | 0.06  |
| ATOM | 1161 | ND1 HIS | 132 | 1.063  | 6.263  | 2.265  | 1.00 | -0.26 |
| ATOM | 1162 | CD2 HIS | 132 | 0.467  | 4.794  | 0.783  | 1.00 | -0.03 |
| ATOM | 1163 | CE1 HIS | 132 | 0.821  | 6.932  | 1.182  | 1.00 | 0.09  |
| ATOM | 1164 | NE2 HIS | 132 | 0.480  | 6.138  | 0.276  | 1.00 | -0.34 |
| ATOM | 1165 | H HIS   | 132 | 1.377  | 5.482  | 5.190  | 1.00 | 0.19  |
| ATOM | 1166 | HA HIS  | 132 | -0.990 | 4.224  | 3.910  | 1.00 | 0.08  |
| ATOM | 1167 | HB2 HIS | 132 | 0.729  | 2.945  | 2.642  | 1.00 | 0.05  |
| ATOM | 1168 | HB1 HIS | 132 | 2.031  | 3.846  | 3.449  | 1.00 | 0.05  |
| ATOM | 1169 | HD1 HIS | 132 | 1.384  | 6.678  | 3.154  | 1.00 | 0.24  |

|      |      |      |     |     |        |        |        |      |       |
|------|------|------|-----|-----|--------|--------|--------|------|-------|
| ATOM | 1170 | HD2  | HIS | 132 | 0.208  | 3.883  | 0.254  | 1.00 | 0.03  |
| ATOM | 1171 | HE1  | HIS | 132 | 0.887  | 8.009  | 1.041  | 1.00 | 0.11  |
| ATOM | 1172 | N    | VAL | 133 | 1.032  | 2.514  | 5.963  | 1.00 | -0.26 |
| ATOM | 1173 | CA   | VAL | 133 | 1.045  | 1.281  | 6.750  | 1.00 | 0.13  |
| ATOM | 1174 | C    | VAL | 133 | -0.169 | 1.229  | 7.645  | 1.00 | 0.20  |
| ATOM | 1175 | O    | VAL | 133 | -0.757 | 0.163  | 7.753  | 1.00 | -0.39 |
| ATOM | 1176 | CB   | VAL | 133 | 2.355  | 1.090  | 7.569  | 1.00 | -0.01 |
| ATOM | 1177 | CG1  | VAL | 133 | 2.223  | -0.087 | 8.576  | 1.00 | -0.06 |
| ATOM | 1178 | CG2  | VAL | 133 | 3.565  | 0.821  | 6.627  | 1.00 | -0.06 |
| ATOM | 1179 | H    | VAL | 133 | 1.788  | 3.158  | 6.062  | 1.00 | 0.19  |
| ATOM | 1180 | HA   | VAL | 133 | 0.968  | 0.427  | 6.063  | 1.00 | 0.08  |
| ATOM | 1181 | HB   | VAL | 133 | 2.534  | 2.013  | 8.143  | 1.00 | 0.03  |
| ATOM | 1182 | HG13 | VAL | 133 | 1.454  | 0.111  | 9.338  | 1.00 | 0.02  |
| ATOM | 1183 | HG12 | VAL | 133 | 3.177  | -0.230 | 9.100  | 1.00 | 0.02  |
| ATOM | 1184 | HG11 | VAL | 133 | 1.968  | -1.021 | 8.052  | 1.00 | 0.02  |
| ATOM | 1185 | HG23 | VAL | 133 | 3.427  | -0.133 | 6.097  | 1.00 | 0.02  |
| ATOM | 1186 | HG22 | VAL | 133 | 4.498  | 0.764  | 7.210  | 1.00 | 0.02  |
| ATOM | 1187 | HG21 | VAL | 133 | 3.684  | 1.613  | 5.874  | 1.00 | 0.02  |
| ATOM | 1188 | N    | ASN | 134 | -0.606 | 2.332  | 8.289  | 1.00 | -0.26 |
| ATOM | 1189 | CA   | ASN | 134 | -1.837 | 2.225  | 9.073  | 1.00 | 0.15  |
| ATOM | 1190 | C    | ASN | 134 | -2.958 | 1.620  | 8.249  | 1.00 | 0.21  |
| ATOM | 1191 | O    | ASN | 134 | -3.756 | 0.862  | 8.781  | 1.00 | -0.39 |
| ATOM | 1192 | CB   | ASN | 134 | -2.359 | 3.591  | 9.582  | 1.00 | 0.08  |
| ATOM | 1193 | CG   | ASN | 134 | -1.417 | 4.326  | 10.501 | 1.00 | 0.18  |
| ATOM | 1194 | OD1  | ASN | 134 | -1.081 | 5.461  | 10.209 | 1.00 | -0.40 |
| ATOM | 1195 | ND2  | ASN | 134 | -0.978 | 3.750  | 11.637 | 1.00 | -0.30 |
| ATOM | 1196 | H    | ASN | 134 | -0.124 | 3.215  | 8.215  | 1.00 | 0.19  |
| ATOM | 1197 | HA   | ASN | 134 | -1.651 | 1.546  | 9.920  | 1.00 | 0.08  |
| ATOM | 1198 | HB2  | ASN | 134 | -3.289 | 3.427  | 10.145 | 1.00 | 0.06  |
| ATOM | 1199 | HB1  | ASN | 134 | -2.579 | 4.228  | 8.710  | 1.00 | 0.06  |
| ATOM | 1200 | HD21 | ASN | 134 | -1.260 | 2.837  | 11.921 | 1.00 | 0.18  |
| ATOM | 1201 | HD22 | ASN | 134 | -0.361 | 4.276  | 12.223 | 1.00 | 0.18  |
| ATOM | 1202 | N    | LEU | 135 | -3.045 | 1.938  | 6.938  | 1.00 | -0.26 |
| ATOM | 1203 | CA   | LEU | 135 | -4.109 | 1.357  | 6.122  | 1.00 | 0.13  |
| ATOM | 1204 | C    | LEU | 135 | -3.847 | -0.108 | 5.844  | 1.00 | 0.20  |
| ATOM | 1205 | O    | LEU | 135 | -4.779 | -0.800 | 5.467  | 1.00 | -0.39 |
| ATOM | 1206 | CB   | LEU | 135 | -4.318 | 2.149  | 4.803  | 1.00 | -0.01 |
| ATOM | 1207 | CG   | LEU | 135 | -4.726 | 3.638  | 5.026  | 1.00 | -0.04 |
| ATOM | 1208 | CD1  | LEU | 135 | -4.591 | 4.423  | 3.694  | 1.00 | -0.06 |
| ATOM | 1209 | CD2  | LEU | 135 | -6.177 | 3.798  | 5.552  | 1.00 | -0.06 |
| ATOM | 1210 | H    | LEU | 135 | -2.349 | 2.506  | 6.488  | 1.00 | 0.19  |
| ATOM | 1211 | HA   | LEU | 135 | -5.047 | 1.383  | 6.692  | 1.00 | 0.08  |
| ATOM | 1212 | HB2  | LEU | 135 | -5.078 | 1.648  | 4.181  | 1.00 | 0.03  |
| ATOM | 1213 | HB1  | LEU | 135 | -3.363 | 2.118  | 4.261  | 1.00 | 0.03  |
| ATOM | 1214 | HG   | LEU | 135 | -4.043 | 4.094  | 5.760  | 1.00 | 0.03  |
| ATOM | 1215 | HD13 | LEU | 135 | -3.536 | 4.446  | 3.386  | 1.00 | 0.02  |
| ATOM | 1216 | HD12 | LEU | 135 | -4.939 | 5.461  | 3.791  | 1.00 | 0.02  |
| ATOM | 1217 | HD11 | LEU | 135 | -5.192 | 3.933  | 2.916  | 1.00 | 0.02  |
| ATOM | 1218 | HD23 | LEU | 135 | -6.316 | 3.306  | 6.524  | 1.00 | 0.02  |
| ATOM | 1219 | HD22 | LEU | 135 | -6.406 | 4.867  | 5.681  | 1.00 | 0.02  |
| ATOM | 1220 | HD21 | LEU | 135 | -6.892 | 3.376  | 4.830  | 1.00 | 0.02  |
| ATOM | 1221 | N    | TYR | 136 | -2.627 | -0.655 | 6.032  | 1.00 | -0.26 |
| ATOM | 1222 | CA   | TYR | 136 | -2.484 | -2.106 | 5.931  | 1.00 | 0.14  |
| ATOM | 1223 | C    | TYR | 136 | -3.302 | -2.695 | 7.055  | 1.00 | 0.21  |
| ATOM | 1224 | O    | TYR | 136 | -3.952 | -3.709 | 6.853  | 1.00 | -0.39 |
| ATOM | 1225 | CB   | TYR | 136 | -1.040 | -2.644 | 6.112  | 1.00 | 0.02  |
| ATOM | 1226 | CG   | TYR | 136 | -0.009 | -2.152 | 5.086  | 1.00 | -0.05 |
| ATOM | 1227 | CD1  | TYR | 136 | -0.231 | -1.072 | 4.223  | 1.00 | -0.07 |

|      |      |         |     |        |        |        |      |       |
|------|------|---------|-----|--------|--------|--------|------|-------|
| ATOM | 1228 | CD2 TYR | 136 | 1.222  | -2.814 | 5.027  | 1.00 | -0.07 |
| ATOM | 1229 | CE1 TYR | 136 | 0.849  | -0.482 | 3.562  | 1.00 | -0.04 |
| ATOM | 1230 | CE2 TYR | 136 | 2.244  | -2.333 | 4.206  | 1.00 | -0.04 |
| ATOM | 1231 | CZ TYR  | 136 | 2.094  | -1.118 | 3.533  | 1.00 | 0.08  |
| ATOM | 1232 | OH TYR  | 136 | 3.179  | -0.567 | 2.849  | 1.00 | -0.34 |
| ATOM | 1233 | H TYR   | 136 | -1.842 | -0.114 | 6.335  | 1.00 | 0.19  |
| ATOM | 1234 | HA TYR  | 136 | -2.871 | -2.458 | 4.961  | 1.00 | 0.08  |
| ATOM | 1235 | HB1 TYR | 136 | -1.078 | -3.745 | 6.063  | 1.00 | 0.05  |
| ATOM | 1236 | HB2 TYR | 136 | -0.663 | -2.360 | 7.107  | 1.00 | 0.05  |
| ATOM | 1237 | HD1 TYR | 136 | -1.220 | -0.665 | 4.053  | 1.00 | 0.05  |
| ATOM | 1238 | HD2 TYR | 136 | 1.394  | -3.706 | 5.622  | 1.00 | 0.05  |
| ATOM | 1239 | HE1 TYR | 136 | 0.705  | 0.475  | 3.082  | 1.00 | 0.05  |
| ATOM | 1240 | HE2 TYR | 136 | 3.155  | -2.904 | 4.096  | 1.00 | 0.05  |
| ATOM | 1241 | HH TYR  | 136 | 3.079  | 0.355  | 2.640  | 1.00 | 0.25  |
| ATOM | 1242 | N GLY   | 137 | -3.286 | -2.070 | 8.255  | 1.00 | -0.27 |
| ATOM | 1243 | CA GLY  | 137 | -4.148 | -2.559 | 9.323  | 1.00 | 0.12  |
| ATOM | 1244 | C GLY   | 137 | -5.583 | -2.460 | 8.878  | 1.00 | 0.20  |
| ATOM | 1245 | O GLY   | 137 | -6.282 | -3.455 | 8.941  | 1.00 | -0.39 |
| ATOM | 1246 | H GLY   | 137 | -2.740 | -1.242 | 8.420  | 1.00 | 0.19  |
| ATOM | 1247 | HA1 GLY | 137 | -3.900 | -3.607 | 9.555  | 1.00 | 0.08  |
| ATOM | 1248 | HA2 GLY | 137 | -4.038 | -1.966 | 10.245 | 1.00 | 0.08  |
| ATOM | 1249 | N SER   | 138 | -6.073 | -1.291 | 8.416  | 1.00 | -0.26 |
| ATOM | 1250 | CA SER  | 138 | -7.477 | -1.235 | 8.000  | 1.00 | 0.15  |
| ATOM | 1251 | C SER   | 138 | -7.768 | -2.280 | 6.944  | 1.00 | 0.21  |
| ATOM | 1252 | O SER   | 138 | -8.756 | -2.991 | 7.043  | 1.00 | -0.39 |
| ATOM | 1253 | CB SER  | 138 | -7.895 | 0.132  | 7.398  | 1.00 | 0.08  |
| ATOM | 1254 | OG SER  | 138 | -7.249 | 0.311  | 6.126  | 1.00 | -0.39 |
| ATOM | 1255 | H SER   | 138 | -5.489 | -0.476 | 8.353  | 1.00 | 0.19  |
| ATOM | 1256 | HA SER  | 138 | -8.100 | -1.431 | 8.888  | 1.00 | 0.08  |
| ATOM | 1257 | HB2 SER | 138 | -7.627 | 0.943  | 8.095  | 1.00 | 0.06  |
| ATOM | 1258 | HB1 SER | 138 | -8.989 | 0.136  | 7.252  | 1.00 | 0.06  |
| ATOM | 1259 | HG SER  | 138 | -7.526 | 1.092  | 5.658  | 1.00 | 0.21  |
| ATOM | 1260 | N ILE   | 139 | -6.911 | -2.389 | 5.908  | 1.00 | -0.26 |
| ATOM | 1261 | CA ILE  | 139 | -7.155 | -3.379 | 4.860  | 1.00 | 0.13  |
| ATOM | 1262 | C ILE   | 139 | -7.148 | -4.768 | 5.455  | 1.00 | 0.20  |
| ATOM | 1263 | O ILE   | 139 | -8.098 | -5.509 | 5.256  | 1.00 | -0.39 |
| ATOM | 1264 | CB ILE  | 139 | -6.131 | -3.260 | 3.691  | 1.00 | 0.00  |
| ATOM | 1265 | CG1 ILE | 139 | -6.420 | -1.958 | 2.878  | 1.00 | -0.05 |
| ATOM | 1266 | CG2 ILE | 139 | -6.182 | -4.527 | 2.791  | 1.00 | -0.06 |
| ATOM | 1267 | CD1 ILE | 139 | -5.307 | -1.577 | 1.866  | 1.00 | -0.06 |
| ATOM | 1268 | H ILE   | 139 | -6.106 | -1.788 | 5.856  | 1.00 | 0.19  |
| ATOM | 1269 | HA ILE  | 139 | -8.163 | -3.215 | 4.448  | 1.00 | 0.08  |
| ATOM | 1270 | HB ILE  | 139 | -5.119 | -3.203 | 4.121  | 1.00 | 0.03  |
| ATOM | 1271 | HG12ILE | 139 | -6.536 | -1.107 | 3.569  | 1.00 | 0.03  |
| ATOM | 1272 | HG11ILE | 139 | -7.372 | -2.074 | 2.340  | 1.00 | 0.03  |
| ATOM | 1273 | HG23ILE | 139 | -5.876 | -5.429 | 3.343  | 1.00 | 0.02  |
| ATOM | 1274 | HG22ILE | 139 | -5.502 | -4.434 | 1.934  | 1.00 | 0.02  |
| ATOM | 1275 | HG21ILE | 139 | -7.208 | -4.678 | 2.426  | 1.00 | 0.02  |
| ATOM | 1276 | HD13ILE | 139 | -4.334 | -1.522 | 2.379  | 1.00 | 0.02  |
| ATOM | 1277 | HD12ILE | 139 | -5.528 | -0.589 | 1.430  | 1.00 | 0.02  |
| ATOM | 1278 | HD11ILE | 139 | -5.238 | -2.297 | 1.038  | 1.00 | 0.02  |
| ATOM | 1279 | N LEU   | 140 | -6.096 | -5.170 | 6.195  | 1.00 | -0.26 |
| ATOM | 1280 | CA LEU  | 140 | -6.119 | -6.507 | 6.786  | 1.00 | 0.13  |
| ATOM | 1281 | C LEU   | 140 | -7.278 | -6.623 | 7.749  | 1.00 | 0.20  |
| ATOM | 1282 | O LEU   | 140 | -7.823 | -7.708 | 7.883  | 1.00 | -0.39 |
| ATOM | 1283 | CB LEU  | 140 | -4.780 | -6.873 | 7.480  | 1.00 | -0.01 |
| ATOM | 1284 | CG LEU  | 140 | -3.635 | -7.126 | 6.450  | 1.00 | -0.04 |
| ATOM | 1285 | CD1 LEU | 140 | -2.255 | -6.978 | 7.143  | 1.00 | -0.06 |

|      |      |         |     |         |         |        |      |       |
|------|------|---------|-----|---------|---------|--------|------|-------|
| ATOM | 1286 | CD2 LEU | 140 | -3.732  | -8.536  | 5.796  | 1.00 | -0.06 |
| ATOM | 1287 | H LEU   | 140 | -5.330  | -4.547  | 6.384  | 1.00 | 0.19  |
| ATOM | 1288 | HA LEU  | 140 | -6.318  | -7.229  | 5.983  | 1.00 | 0.08  |
| ATOM | 1289 | HB2 LEU | 140 | -4.912  | -7.776  | 8.098  | 1.00 | 0.03  |
| ATOM | 1290 | HB1 LEU | 140 | -4.530  | -6.043  | 8.162  | 1.00 | 0.03  |
| ATOM | 1291 | HG LEU  | 140 | -3.685  | -6.363  | 5.653  | 1.00 | 0.03  |
| ATOM | 1292 | HD13LEU | 140 | -2.152  | -5.956  | 7.533  | 1.00 | 0.02  |
| ATOM | 1293 | HD12LEU | 140 | -1.432  | -7.155  | 6.432  | 1.00 | 0.02  |
| ATOM | 1294 | HD11LEU | 140 | -2.165  | -7.696  | 7.973  | 1.00 | 0.02  |
| ATOM | 1295 | HD23LEU | 140 | -3.697  | -9.323  | 6.565  | 1.00 | 0.02  |
| ATOM | 1296 | HD22LEU | 140 | -2.885  | -8.692  | 5.110  | 1.00 | 0.02  |
| ATOM | 1297 | HD21LEU | 140 | -4.655  | -8.661  | 5.213  | 1.00 | 0.02  |
| ATOM | 1298 | N PHE   | 141 | -7.702  | -5.533  | 8.421  | 1.00 | -0.26 |
| ATOM | 1299 | CA PHE  | 141 | -8.925  | -5.611  | 9.210  | 1.00 | 0.14  |
| ATOM | 1300 | C PHE   | 141 | -10.075 | -5.882  | 8.262  | 1.00 | 0.21  |
| ATOM | 1301 | O PHE   | 141 | -10.926 | -6.683  | 8.607  | 1.00 | -0.39 |
| ATOM | 1302 | CB PHE  | 141 | -9.213  | -4.346  | 10.065 | 1.00 | 0.02  |
| ATOM | 1303 | CG PHE  | 141 | -8.088  | -3.895  | 11.013 | 1.00 | -0.04 |
| ATOM | 1304 | CD1 PHE | 141 | -6.958  | -4.674  | 11.297 | 1.00 | -0.06 |
| ATOM | 1305 | CD2 PHE | 141 | -8.201  | -2.631  | 11.605 | 1.00 | -0.06 |
| ATOM | 1306 | CE1 PHE | 141 | -5.912  | -4.149  | 12.062 | 1.00 | -0.07 |
| ATOM | 1307 | CE2 PHE | 141 | -7.166  | -2.111  | 12.388 | 1.00 | -0.07 |
| ATOM | 1308 | CZ PHE  | 141 | -6.011  | -2.866  | 12.606 | 1.00 | -0.07 |
| ATOM | 1309 | H PHE   | 141 | -7.239  | -4.648  | 8.339  | 1.00 | 0.19  |
| ATOM | 1310 | HA PHE  | 141 | -8.846  | -6.455  | 9.910  | 1.00 | 0.08  |
| ATOM | 1311 | HB2 PHE | 141 | -10.127 | -4.505  | 10.660 | 1.00 | 0.05  |
| ATOM | 1312 | HB1 PHE | 141 | -9.393  | -3.509  | 9.380  | 1.00 | 0.05  |
| ATOM | 1313 | HD1 PHE | 141 | -6.862  | -5.687  | 10.926 | 1.00 | 0.06  |
| ATOM | 1314 | HD2 PHE | 141 | -9.100  | -2.040  | 11.454 | 1.00 | 0.06  |
| ATOM | 1315 | HE1 PHE | 141 | -5.018  | -4.740  | 12.232 | 1.00 | 0.06  |
| ATOM | 1316 | HE2 PHE | 141 | -7.260  | -1.122  | 12.825 | 1.00 | 0.06  |
| ATOM | 1317 | HZ PHE  | 141 | -5.196  | -2.459  | 13.196 | 1.00 | 0.06  |
| ATOM | 1318 | N LEU   | 142 | -10.159 | -5.259  | 7.064  | 1.00 | -0.26 |
| ATOM | 1319 | CA LEU  | 142 | -11.258 | -5.596  | 6.151  | 1.00 | 0.13  |
| ATOM | 1320 | C LEU   | 142 | -11.113 | -7.030  | 5.689  | 1.00 | 0.20  |
| ATOM | 1321 | O LEU   | 142 | -12.100 | -7.749  | 5.703  | 1.00 | -0.39 |
| ATOM | 1322 | CB LEU  | 142 | -11.353 | -4.692  | 4.888  | 1.00 | -0.01 |
| ATOM | 1323 | CG LEU  | 142 | -11.745 | -3.208  | 5.165  | 1.00 | -0.04 |
| ATOM | 1324 | CD1 LEU | 142 | -11.468 | -2.348  | 3.901  | 1.00 | -0.06 |
| ATOM | 1325 | CD2 LEU | 142 | -13.244 | -3.049  | 5.553  | 1.00 | -0.06 |
| ATOM | 1326 | H LEU   | 142 | -9.462  | -4.595  | 6.773  | 1.00 | 0.19  |
| ATOM | 1327 | HA LEU  | 142 | -12.208 | -5.539  | 6.702  | 1.00 | 0.08  |
| ATOM | 1328 | HB2 LEU | 142 | -12.104 | -5.117  | 4.203  | 1.00 | 0.03  |
| ATOM | 1329 | HB1 LEU | 142 | -10.379 | -4.731  | 4.378  | 1.00 | 0.03  |
| ATOM | 1330 | HG LEU  | 142 | -11.116 | -2.810  | 5.976  | 1.00 | 0.03  |
| ATOM | 1331 | HD13LEU | 142 | -10.404 | -2.384  | 3.624  | 1.00 | 0.02  |
| ATOM | 1332 | HD12LEU | 142 | -11.738 | -1.295  | 4.078  | 1.00 | 0.02  |
| ATOM | 1333 | HD11LEU | 142 | -12.061 | -2.726  | 3.056  | 1.00 | 0.02  |
| ATOM | 1334 | HD23LEU | 142 | -13.893 | -3.388  | 4.732  | 1.00 | 0.02  |
| ATOM | 1335 | HD22LEU | 142 | -13.473 | -1.992  | 5.759  | 1.00 | 0.02  |
| ATOM | 1336 | HD21LEU | 142 | -13.501 | -3.625  | 6.451  | 1.00 | 0.02  |
| ATOM | 1337 | N THR   | 143 | -9.912  | -7.486  | 5.271  | 1.00 | -0.26 |
| ATOM | 1338 | CA THR  | 143 | -9.770  | -8.894  | 4.891  | 1.00 | 0.16  |
| ATOM | 1339 | C THR   | 143 | -10.171 | -9.767  | 6.058  | 1.00 | 0.21  |
| ATOM | 1340 | O THR   | 143 | -10.836 | -10.774 | 5.873  | 1.00 | -0.39 |
| ATOM | 1341 | CB THR  | 143 | -8.306  | -9.253  | 4.506  | 1.00 | 0.09  |
| ATOM | 1342 | OG1 THR | 143 | -7.845  | -8.296  | 3.535  | 1.00 | -0.39 |
| ATOM | 1343 | CG2 THR | 143 | -8.201  | -10.689 | 3.924  | 1.00 | -0.03 |

|      |      |      |     |     |         |         |        |      |       |
|------|------|------|-----|-----|---------|---------|--------|------|-------|
| ATOM | 1344 | H    | THR | 143 | -9.109  | -6.881  | 5.231  | 1.00 | 0.19  |
| ATOM | 1345 | HA   | THR | 143 | -10.431 | -9.097  | 4.034  | 1.00 | 0.08  |
| ATOM | 1346 | HB   | THR | 143 | -7.682  | -9.184  | 5.414  | 1.00 | 0.06  |
| ATOM | 1347 | HG1  | THR | 143 | -6.933  | -8.413  | 3.286  | 1.00 | 0.21  |
| ATOM | 1348 | HG22 | THR | 143 | -7.154  | -10.917 | 3.670  | 1.00 | 0.03  |
| ATOM | 1349 | HG21 | THR | 143 | -8.810  | -10.770 | 3.011  | 1.00 | 0.03  |
| ATOM | 1350 | HG23 | THR | 143 | -8.548  | -11.440 | 4.650  | 1.00 | 0.03  |
| ATOM | 1351 | N    | CYS | 144 | -9.759  | -9.390  | 7.288  | 1.00 | -0.26 |
| ATOM | 1352 | CA   | CYS | 144 | -10.178 | -10.163 | 8.448  | 1.00 | 0.14  |
| ATOM | 1353 | C    | CYS | 144 | -11.685 | -10.119 | 8.534  | 1.00 | 0.20  |
| ATOM | 1354 | O    | CYS | 144 | -12.303 | -11.168 | 8.493  | 1.00 | -0.39 |
| ATOM | 1355 | CB   | CYS | 144 | -9.555  | -9.639  | 9.768  | 1.00 | 0.03  |
| ATOM | 1356 | SG   | CYS | 144 | -10.255 | -10.516 | 11.202 | 1.00 | -0.17 |
| ATOM | 1357 | H    | CYS | 144 | -9.199  | -8.569  | 7.432  | 1.00 | 0.19  |
| ATOM | 1358 | HA   | CYS | 144 | -9.846  | -11.204 | 8.312  | 1.00 | 0.08  |
| ATOM | 1359 | HB2  | CYS | 144 | -9.794  | -8.578  | 9.900  | 1.00 | 0.04  |
| ATOM | 1360 | HB1  | CYS | 144 | -8.460  | -9.757  | 9.751  | 1.00 | 0.04  |
| ATOM | 1361 | LPG2 | CYS | 144 | -9.126  | -11.718 | 10.777 | 1.00 | 0.00  |
| ATOM | 1362 | LPG1 | CYS | 144 | -10.029 | -11.228 | 11.193 | 1.00 | 0.00  |
| ATOM | 1363 | HG   | CYS | 144 | -9.791  | -10.007 | 11.937 | 1.00 | 0.10  |
| ATOM | 1364 | N    | ILE | 145 | -12.305 | -8.925  | 8.655  | 1.00 | -0.26 |
| ATOM | 1365 | CA   | ILE | 145 | -13.749 | -8.863  | 8.870  | 1.00 | 0.13  |
| ATOM | 1366 | C    | ILE | 145 | -14.454 | -9.572  | 7.740  | 1.00 | 0.20  |
| ATOM | 1367 | O    | ILE | 145 | -15.304 | -10.397 | 8.031  | 1.00 | -0.39 |
| ATOM | 1368 | CB   | ILE | 145 | -14.303 | -7.410  | 9.030  | 1.00 | 0.00  |
| ATOM | 1369 | CG1  | ILE | 145 | -13.801 | -6.772  | 10.365 | 1.00 | -0.05 |
| ATOM | 1370 | CG2  | ILE | 145 | -15.859 | -7.370  | 8.970  | 1.00 | -0.06 |
| ATOM | 1371 | CD1  | ILE | 145 | -14.292 | -5.312  | 10.557 | 1.00 | -0.06 |
| ATOM | 1372 | H    | ILE | 145 | -11.784 | -8.074  | 8.582  | 1.00 | 0.19  |
| ATOM | 1373 | HA   | ILE | 145 | -13.982 | -9.409  | 9.798  | 1.00 | 0.08  |
| ATOM | 1374 | HB   | ILE | 145 | -13.927 | -6.819  | 8.177  | 1.00 | 0.03  |
| ATOM | 1375 | HG12 | ILE | 145 | -12.700 | -6.760  | 10.375 | 1.00 | 0.03  |
| ATOM | 1376 | HG11 | ILE | 145 | -14.130 | -7.371  | 11.230 | 1.00 | 0.03  |
| ATOM | 1377 | HG23 | ILE | 145 | -16.255 | -7.836  | 8.055  | 1.00 | 0.02  |
| ATOM | 1378 | HG22 | ILE | 145 | -16.236 | -6.337  | 8.977  | 1.00 | 0.02  |
| ATOM | 1379 | HG21 | ILE | 145 | -16.268 | -7.895  | 9.845  | 1.00 | 0.02  |
| ATOM | 1380 | HD13 | ILE | 145 | -14.230 | -4.790  | 9.596  | 1.00 | 0.02  |
| ATOM | 1381 | HD12 | ILE | 145 | -13.665 | -4.771  | 11.281 | 1.00 | 0.02  |
| ATOM | 1382 | HD11 | ILE | 145 | -15.333 | -5.273  | 10.914 | 1.00 | 0.02  |
| ATOM | 1383 | N    | SER | 146 | -14.146 | -9.274  | 6.460  | 1.00 | -0.26 |
| ATOM | 1384 | CA   | SER | 146 | -14.921 | -9.865  | 5.369  | 1.00 | 0.15  |
| ATOM | 1385 | C    | SER | 146 | -15.072 | -11.354 | 5.559  | 1.00 | 0.21  |
| ATOM | 1386 | O    | SER | 146 | -16.183 | -11.861 | 5.572  | 1.00 | -0.39 |
| ATOM | 1387 | CB   | SER | 146 | -14.258 | -9.655  | 3.979  | 1.00 | 0.08  |
| ATOM | 1388 | OG   | SER | 146 | -13.037 | -10.414 | 3.897  | 1.00 | -0.39 |
| ATOM | 1389 | H    | SER | 146 | -13.406 | -8.629  | 6.246  | 1.00 | 0.19  |
| ATOM | 1390 | HA   | SER | 146 | -15.924 | -9.409  | 5.376  | 1.00 | 0.08  |
| ATOM | 1391 | HB2  | SER | 146 | -14.049 | -8.583  | 3.825  | 1.00 | 0.06  |
| ATOM | 1392 | HB1  | SER | 146 | -14.955 | -9.996  | 3.194  | 1.00 | 0.06  |
| ATOM | 1393 | HG   | SER | 146 | -12.592 | -10.332 | 3.058  | 1.00 | 0.21  |
| ATOM | 1394 | N    | ALA | 147 | -13.941 | -12.072 | 5.703  | 1.00 | -0.26 |
| ATOM | 1395 | CA   | ALA | 147 | -14.019 | -13.518 | 5.886  | 1.00 | 0.13  |
| ATOM | 1396 | C    | ALA | 147 | -14.299 | -13.926 | 7.314  | 1.00 | 0.20  |
| ATOM | 1397 | O    | ALA | 147 | -14.891 | -14.972 | 7.531  | 1.00 | -0.39 |
| ATOM | 1398 | CB   | ALA | 147 | -12.678 | -14.150 | 5.449  | 1.00 | -0.02 |
| ATOM | 1399 | HB3  | ALA | 147 | -11.851 | -13.812 | 6.090  | 1.00 | 0.03  |
| ATOM | 1400 | HB2  | ALA | 147 | -12.457 | -13.854 | 4.414  | 1.00 | 0.03  |
| ATOM | 1401 | HB1  | ALA | 147 | -12.752 | -15.245 | 5.511  | 1.00 | 0.03  |

|      |      |      |     |     |         |         |        |      |       |
|------|------|------|-----|-----|---------|---------|--------|------|-------|
| ATOM | 1402 | H    | ALA | 147 | -13.046 | -11.608 | 5.684  | 1.00 | 0.19  |
| ATOM | 1403 | HA   | ALA | 147 | -14.822 | -13.935 | 5.258  | 1.00 | 0.08  |
| ATOM | 1404 | N    | HIS | 148 | -13.882 | -13.141 | 8.327  | 1.00 | -0.26 |
| ATOM | 1405 | CA   | HIS | 148 | -14.041 | -13.583 | 9.712  | 1.00 | 0.14  |
| ATOM | 1406 | C    | HIS | 148 | -15.523 | -13.469 | 10.011 | 1.00 | 0.21  |
| ATOM | 1407 | O    | HIS | 148 | -16.107 | -14.401 | 10.546 | 1.00 | -0.39 |
| ATOM | 1408 | CB   | HIS | 148 | -13.104 | -12.840 | 10.708 | 1.00 | 0.04  |
| ATOM | 1409 | CG   | HIS | 148 | -11.648 | -13.227 | 10.500 | 1.00 | 0.06  |
| ATOM | 1410 | ND1  | HIS | 148 | -11.047 | -13.338 | 9.334  | 1.00 | -0.26 |
| ATOM | 1411 | CD2  | HIS | 148 | -10.757 | -13.510 | 11.472 | 1.00 | -0.03 |
| ATOM | 1412 | CE1  | HIS | 148 | -9.816  | -13.705 | 9.487  | 1.00 | 0.09  |
| ATOM | 1413 | NE2  | HIS | 148 | -9.581  | -13.829 | 10.709 | 1.00 | -0.34 |
| ATOM | 1414 | H    | HIS | 148 | -13.520 | -12.223 | 8.145  | 1.00 | 0.19  |
| ATOM | 1415 | HA   | HIS | 148 | -13.752 | -14.641 | 9.790  | 1.00 | 0.08  |
| ATOM | 1416 | HB2  | HIS | 148 | -13.398 | -13.114 | 11.732 | 1.00 | 0.05  |
| ATOM | 1417 | HB1  | HIS | 148 | -13.233 | -11.753 | 10.623 | 1.00 | 0.05  |
| ATOM | 1418 | HD1  | HIS | 148 | -11.473 | -13.148 | 8.422  | 1.00 | 0.24  |
| ATOM | 1419 | HD2  | HIS | 148 | -10.854 | -13.502 | 12.553 | 1.00 | 0.03  |
| ATOM | 1420 | HE1  | HIS | 148 | -9.086  | -13.879 | 8.696  | 1.00 | 0.11  |
| ATOM | 1421 | N    | ARG | 149 | -16.159 | -12.346 | 9.610  | 1.00 | -0.26 |
| ATOM | 1422 | CA   | ARG | 149 | -17.613 | -12.187 | 9.741  | 1.00 | 0.13  |
| ATOM | 1423 | C    | ARG | 149 | -18.355 | -13.364 | 9.133  | 1.00 | 0.25  |
| ATOM | 1424 | O    | ARG | 149 | -17.792 | -14.151 | 8.387  | 1.00 | -0.33 |
| ATOM | 1425 | CB   | ARG | 149 | -18.001 | -10.826 | 9.080  | 1.00 | -0.01 |
| ATOM | 1426 | CG   | ARG | 149 | -19.453 | -10.292 | 9.244  | 1.00 | -0.02 |
| ATOM | 1427 | CD   | ARG | 149 | -19.506 | -8.790  | 8.822  | 1.00 | 0.06  |
| ATOM | 1428 | NE   | ARG | 149 | -20.811 | -8.135  | 8.998  | 1.00 | -0.27 |
| ATOM | 1429 | CZ   | ARG | 149 | -21.732 | -8.070  | 8.067  | 1.00 | 0.29  |
| ATOM | 1430 | NH1  | ARG | 149 | -21.671 | -8.731  | 6.941  | 1.00 | -0.28 |
| ATOM | 1431 | NH2  | ARG | 149 | -22.773 | -7.303  | 8.250  | 1.00 | -0.28 |
| ATOM | 1432 | H    | ARG | 149 | -15.634 | -11.620 | 9.156  | 1.00 | 0.19  |
| ATOM | 1433 | HA   | ARG | 149 | -17.852 | -12.153 | 10.816 | 1.00 | 0.08  |
| ATOM | 1434 | HB2  | ARG | 149 | -17.770 | -10.878 | 8.003  | 1.00 | 0.03  |
| ATOM | 1435 | HB1  | ARG | 149 | -17.341 | -10.078 | 9.545  | 1.00 | 0.03  |
| ATOM | 1436 | HG2  | ARG | 149 | -19.757 | -10.385 | 10.295 | 1.00 | 0.03  |
| ATOM | 1437 | HG1  | ARG | 149 | -20.149 | -10.882 | 8.628  | 1.00 | 0.03  |
| ATOM | 1438 | HD2  | ARG | 149 | -19.102 | -8.653  | 7.805  | 1.00 | 0.07  |
| ATOM | 1439 | HD1  | ARG | 149 | -18.802 | -8.230  | 9.459  | 1.00 | 0.07  |
| ATOM | 1440 | HE   | ARG | 149 | -20.953 | -7.584  | 9.862  | 1.00 | 0.26  |
| ATOM | 1441 | HH11 | ARG | 149 | -20.918 | -9.394  | 6.737  | 1.00 | 0.26  |
| ATOM | 1442 | HH12 | ARG | 149 | -22.410 | -8.608  | 6.229  | 1.00 | 0.26  |
| ATOM | 1443 | HH21 | ARG | 149 | -22.972 | -6.811  | 9.142  | 1.00 | 0.26  |
| ATOM | 1444 | HH22 | ARG | 149 | -23.465 | -7.170  | 7.505  | 1.00 | 0.26  |
| TER  | 1445 |      | ARG | 149 |         |         |        |      |       |
| ATOM | 1446 | C    | ACE | 163 | -13.949 | -26.392 | 14.257 | 1.00 | 0.18  |
| ATOM | 1447 | O    | ACE | 163 | -13.209 | -27.304 | 13.928 | 1.00 | -0.40 |
| ATOM | 1448 | CH3  | ACE | 163 | -14.889 | -26.594 | 15.416 | 1.00 | 0.03  |
| ATOM | 1449 | H    | ACE | 163 | -15.928 | -26.512 | 15.064 | 1.00 | 0.05  |
| ATOM | 1450 | H    | ACE | 163 | -14.705 | -25.831 | 16.186 | 1.00 | 0.05  |
| ATOM | 1451 | H    | ACE | 163 | -14.743 | -27.589 | 15.863 | 1.00 | 0.05  |
| ATOM | 1452 | N    | LYS | 164 | -13.952 | -25.204 | 13.612 | 1.00 | -0.27 |
| ATOM | 1453 | CA   | LYS | 164 | -13.021 | -24.977 | 12.505 | 1.00 | 0.13  |
| ATOM | 1454 | C    | LYS | 164 | -12.886 | -23.494 | 12.202 | 1.00 | 0.20  |
| ATOM | 1455 | O    | LYS | 164 | -11.817 | -22.940 | 12.412 | 1.00 | -0.39 |
| ATOM | 1456 | CB   | LYS | 164 | -13.450 | -25.787 | 11.246 | 1.00 | -0.01 |
| ATOM | 1457 | CG   | LYS | 164 | -12.335 | -25.823 | 10.165 | 1.00 | -0.04 |
| ATOM | 1458 | CD   | LYS | 164 | -12.856 | -26.448 | 8.840  | 1.00 | -0.01 |
| ATOM | 1459 | CE   | LYS | 164 | -11.698 | -26.719 | 7.839  | 1.00 | -0.04 |

|      |      |     |     |     |         |         |        |      |       |
|------|------|-----|-----|-----|---------|---------|--------|------|-------|
| ATOM | 1460 | NZ  | LYS | 164 | -12.211 | -26.960 | 6.466  | 1.00 | 0.22  |
| ATOM | 1461 | H   | LYS | 164 | -14.556 | -24.466 | 13.915 | 1.00 | 0.19  |
| ATOM | 1462 | HA  | LYS | 164 | -12.025 | -25.333 | 12.823 | 1.00 | 0.08  |
| ATOM | 1463 | HB2 | LYS | 164 | -14.373 | -25.369 | 10.822 | 1.00 | 0.03  |
| ATOM | 1464 | HB1 | LYS | 164 | -13.672 | -26.828 | 11.531 | 1.00 | 0.03  |
| ATOM | 1465 | HG2 | LYS | 164 | -11.485 | -26.413 | 10.547 | 1.00 | 0.03  |
| ATOM | 1466 | HG1 | LYS | 164 | -11.978 | -24.800 | 9.963  | 1.00 | 0.03  |
| ATOM | 1467 | HD2 | LYS | 164 | -13.584 | -25.750 | 8.394  | 1.00 | 0.03  |
| ATOM | 1468 | HD1 | LYS | 164 | -13.379 | -27.398 | 9.044  | 1.00 | 0.03  |
| ATOM | 1469 | HE2 | LYS | 164 | -11.117 | -27.591 | 8.187  | 1.00 | 0.08  |
| ATOM | 1470 | HE1 | LYS | 164 | -11.011 | -25.855 | 7.838  | 1.00 | 0.08  |
| ATOM | 1471 | HZ3 | LYS | 164 | -12.849 | -27.826 | 6.362  | 1.00 | 0.20  |
| ATOM | 1472 | HZ2 | LYS | 164 | -11.406 | -27.005 | 5.742  | 1.00 | 0.20  |
| ATOM | 1473 | HZ1 | LYS | 164 | -12.733 | -26.105 | 6.062  | 1.00 | 0.20  |
| ATOM | 1474 | N   | LYS | 165 | -13.942 | -22.796 | 11.719 | 1.00 | -0.26 |
| ATOM | 1475 | CA  | LYS | 165 | -13.786 | -21.368 | 11.437 | 1.00 | 0.13  |
| ATOM | 1476 | C   | LYS | 165 | -13.578 | -20.641 | 12.747 | 1.00 | 0.20  |
| ATOM | 1477 | O   | LYS | 165 | -12.650 | -19.856 | 12.854 | 1.00 | -0.39 |
| ATOM | 1478 | CB  | LYS | 165 | -15.010 | -20.742 | 10.706 | 1.00 | -0.01 |
| ATOM | 1479 | CG  | LYS | 165 | -14.684 | -19.312 | 10.184 | 1.00 | -0.04 |
| ATOM | 1480 | CD  | LYS | 165 | -15.946 | -18.523 | 9.727  | 1.00 | -0.01 |
| ATOM | 1481 | CE  | LYS | 165 | -15.529 | -17.213 | 8.999  | 1.00 | -0.04 |
| ATOM | 1482 | NZ  | LYS | 165 | -16.613 | -16.203 | 8.876  | 1.00 | 0.22  |
| ATOM | 1483 | H   | LYS | 165 | -14.838 | -23.217 | 11.579 | 1.00 | 0.19  |
| ATOM | 1484 | HA  | LYS | 165 | -12.898 | -21.232 | 10.797 | 1.00 | 0.08  |
| ATOM | 1485 | HB2 | LYS | 165 | -15.871 | -20.707 | 11.392 | 1.00 | 0.03  |
| ATOM | 1486 | HB1 | LYS | 165 | -15.285 | -21.375 | 9.846  | 1.00 | 0.03  |
| ATOM | 1487 | HG2 | LYS | 165 | -13.976 | -19.401 | 9.343  | 1.00 | 0.03  |
| ATOM | 1488 | HG1 | LYS | 165 | -14.191 | -18.730 | 10.979 | 1.00 | 0.03  |
| ATOM | 1489 | HD2 | LYS | 165 | -16.552 | -18.278 | 10.615 | 1.00 | 0.03  |
| ATOM | 1490 | HD1 | LYS | 165 | -16.561 | -19.140 | 9.051  | 1.00 | 0.03  |
| ATOM | 1491 | HE2 | LYS | 165 | -15.143 | -17.480 | 7.999  | 1.00 | 0.08  |
| ATOM | 1492 | HE1 | LYS | 165 | -14.698 | -16.761 | 9.561  | 1.00 | 0.08  |
| ATOM | 1493 | HZ3 | LYS | 165 | -17.521 | -16.571 | 8.425  | 1.00 | 0.20  |
| ATOM | 1494 | HZ2 | LYS | 165 | -16.347 | -15.349 | 8.263  | 1.00 | 0.20  |
| ATOM | 1495 | HZ1 | LYS | 165 | -16.878 | -15.742 | 9.820  | 1.00 | 0.20  |
| ATOM | 1496 | N   | LYS | 166 | -14.427 | -20.889 | 13.772 | 1.00 | -0.26 |
| ATOM | 1497 | CA  | LYS | 166 | -14.248 | -20.189 | 15.047 | 1.00 | 0.13  |
| ATOM | 1498 | C   | LYS | 166 | -12.955 | -20.588 | 15.729 | 1.00 | 0.20  |
| ATOM | 1499 | O   | LYS | 166 | -12.598 | -19.954 | 16.706 | 1.00 | -0.39 |
| ATOM | 1500 | CB  | LYS | 166 | -15.493 | -20.343 | 15.970 | 1.00 | -0.01 |
| ATOM | 1501 | CG  | LYS | 166 | -15.509 | -19.331 | 17.153 | 1.00 | -0.04 |
| ATOM | 1502 | CD  | LYS | 166 | -16.855 | -19.354 | 17.932 | 1.00 | -0.01 |
| ATOM | 1503 | CE  | LYS | 166 | -16.858 | -18.298 | 19.074 | 1.00 | -0.04 |
| ATOM | 1504 | NZ  | LYS | 166 | -18.142 | -18.286 | 19.817 | 1.00 | 0.22  |
| ATOM | 1505 | H   | LYS | 166 | -15.159 | -21.565 | 13.689 | 1.00 | 0.19  |
| ATOM | 1506 | HA  | LYS | 166 | -14.155 | -19.118 | 14.812 | 1.00 | 0.08  |
| ATOM | 1507 | HB2 | LYS | 166 | -15.541 | -21.377 | 16.348 | 1.00 | 0.03  |
| ATOM | 1508 | HB1 | LYS | 166 | -16.389 | -20.159 | 15.354 | 1.00 | 0.03  |
| ATOM | 1509 | HG2 | LYS | 166 | -15.348 | -18.313 | 16.764 | 1.00 | 0.03  |
| ATOM | 1510 | HG1 | LYS | 166 | -14.697 | -19.564 | 17.859 | 1.00 | 0.03  |
| ATOM | 1511 | HD2 | LYS | 166 | -17.015 | -20.360 | 18.352 | 1.00 | 0.03  |
| ATOM | 1512 | HD1 | LYS | 166 | -17.683 | -19.134 | 17.238 | 1.00 | 0.03  |
| ATOM | 1513 | HE2 | LYS | 166 | -16.674 | -17.299 | 18.639 | 1.00 | 0.08  |
| ATOM | 1514 | HE1 | LYS | 166 | -16.028 | -18.517 | 19.770 | 1.00 | 0.08  |
| ATOM | 1515 | HZ3 | LYS | 166 | -18.995 | -18.046 | 19.195 | 1.00 | 0.20  |
| ATOM | 1516 | HZ2 | LYS | 166 | -18.177 | -17.523 | 20.585 | 1.00 | 0.20  |
| ATOM | 1517 | HZ1 | LYS | 166 | -18.359 | -19.228 | 20.301 | 1.00 | 0.20  |

|      |      |      |     |     |         |         |        |      |       |
|------|------|------|-----|-----|---------|---------|--------|------|-------|
| ATOM | 1518 | N    | ASN | 167 | -12.210 | -21.610 | 15.252 | 1.00 | -0.26 |
| ATOM | 1519 | CA   | ASN | 167 | -10.842 | -21.819 | 15.727 | 1.00 | 0.15  |
| ATOM | 1520 | C    | ASN | 167 | -9.894  | -21.041 | 14.835 | 1.00 | 0.21  |
| ATOM | 1521 | O    | ASN | 167 | -9.090  | -20.270 | 15.339 | 1.00 | -0.39 |
| ATOM | 1522 | CB   | ASN | 167 | -10.507 | -23.332 | 15.707 | 1.00 | 0.08  |
| ATOM | 1523 | CG   | ASN | 167 | -11.623 | -24.047 | 16.427 | 1.00 | 0.18  |
| ATOM | 1524 | OD1  | ASN | 167 | -12.674 | -24.214 | 15.832 | 1.00 | -0.40 |
| ATOM | 1525 | ND2  | ASN | 167 | -11.464 | -24.468 | 17.696 | 1.00 | -0.30 |
| ATOM | 1526 | H    | ASN | 167 | -12.545 | -22.212 | 14.528 | 1.00 | 0.19  |
| ATOM | 1527 | HA   | ASN | 167 | -10.722 | -21.468 | 16.767 | 1.00 | 0.08  |
| ATOM | 1528 | HB2  | ASN | 167 | -9.527  | -23.519 | 16.171 | 1.00 | 0.06  |
| ATOM | 1529 | HB1  | ASN | 167 | -10.471 | -23.715 | 14.676 | 1.00 | 0.06  |
| ATOM | 1530 | HD21 | ASN | 167 | -10.614 | -24.328 | 18.203 | 1.00 | 0.18  |
| ATOM | 1531 | HD22 | ASN | 167 | -12.229 | -24.935 | 18.140 | 1.00 | 0.18  |
| ATOM | 1532 | N    | ALA | 168 | -9.966  | -21.210 | 13.494 | 1.00 | -0.26 |
| ATOM | 1533 | CA   | ALA | 168 | -9.075  | -20.449 | 12.614 | 1.00 | 0.13  |
| ATOM | 1534 | C    | ALA | 168 | -9.184  | -18.958 | 12.867 | 1.00 | 0.20  |
| ATOM | 1535 | O    | ALA | 168 | -8.192  | -18.257 | 12.746 | 1.00 | -0.39 |
| ATOM | 1536 | CB   | ALA | 168 | -9.408  | -20.708 | 11.121 | 1.00 | -0.02 |
| ATOM | 1537 | H    | ALA | 168 | -10.637 | -21.832 | 13.076 | 1.00 | 0.19  |
| ATOM | 1538 | HA   | ALA | 168 | -8.040  | -20.770 | 12.810 | 1.00 | 0.08  |
| ATOM | 1539 | HB3  | ALA | 168 | -10.435 | -20.381 | 10.900 | 1.00 | 0.03  |
| ATOM | 1540 | HB2  | ALA | 168 | -9.321  | -21.782 | 10.891 | 1.00 | 0.03  |
| ATOM | 1541 | HB1  | ALA | 168 | -8.713  | -20.152 | 10.472 | 1.00 | 0.03  |
| ATOM | 1542 | N    | ILE | 169 | -10.395 | -18.470 | 13.221 | 1.00 | -0.26 |
| ATOM | 1543 | CA   | ILE | 169 | -10.599 | -17.039 | 13.474 | 1.00 | 0.13  |
| ATOM | 1544 | C    | ILE | 169 | -9.520  | -16.416 | 14.339 | 1.00 | 0.20  |
| ATOM | 1545 | O    | ILE | 169 | -9.277  | -15.230 | 14.183 | 1.00 | -0.39 |
| ATOM | 1546 | CB   | ILE | 169 | -11.995 | -16.799 | 14.148 | 1.00 | 0.00  |
| ATOM | 1547 | CG1  | ILE | 169 | -12.524 | -15.351 | 13.945 | 1.00 | -0.05 |
| ATOM | 1548 | CG2  | ILE | 169 | -11.942 | -17.165 | 15.656 | 1.00 | -0.06 |
| ATOM | 1549 | CD1  | ILE | 169 | -13.954 | -15.121 | 14.505 | 1.00 | -0.06 |
| ATOM | 1550 | HB   | ILE | 169 | -12.736 | -17.442 | 13.646 | 1.00 | 0.03  |
| ATOM | 1551 | HG23 | ILE | 169 | -11.399 | -18.109 | 15.786 | 1.00 | 0.02  |
| ATOM | 1552 | HG22 | ILE | 169 | -12.948 | -17.288 | 16.084 | 1.00 | 0.02  |
| ATOM | 1553 | HG21 | ILE | 169 | -11.419 | -16.384 | 16.226 | 1.00 | 0.02  |
| ATOM | 1554 | HG12 | ILE | 169 | -12.564 | -15.159 | 12.861 | 1.00 | 0.03  |
| ATOM | 1555 | HG11 | ILE | 169 | -11.838 | -14.632 | 14.418 | 1.00 | 0.03  |
| ATOM | 1556 | H    | ILE | 169 | -11.183 | -19.091 | 13.266 | 1.00 | 0.19  |
| ATOM | 1557 | HA   | ILE | 169 | -10.574 | -16.540 | 12.492 | 1.00 | 0.08  |
| ATOM | 1558 | HD13 | ILE | 169 | -14.654 | -15.870 | 14.104 | 1.00 | 0.02  |
| ATOM | 1559 | HD12 | ILE | 169 | -14.311 | -14.121 | 14.214 | 1.00 | 0.02  |
| ATOM | 1560 | HD11 | ILE | 169 | -13.965 | -15.175 | 15.604 | 1.00 | 0.02  |
| ATOM | 1561 | N    | CYS | 170 | -8.873  | -17.154 | 15.272 | 1.00 | -0.26 |
| ATOM | 1562 | CA   | CYS | 170 | -7.906  | -16.515 | 16.168 | 1.00 | 0.14  |
| ATOM | 1563 | C    | CYS | 170 | -6.521  | -16.496 | 15.558 | 1.00 | 0.20  |
| ATOM | 1564 | O    | CYS | 170 | -5.931  | -15.434 | 15.430 | 1.00 | -0.39 |
| ATOM | 1565 | CB   | CYS | 170 | -7.858  | -17.236 | 17.542 | 1.00 | 0.03  |
| ATOM | 1566 | SG   | CYS | 170 | -9.515  | -17.179 | 18.303 | 1.00 | -0.17 |
| ATOM | 1567 | LPG1 | CYS | 170 | -10.285 | -17.859 | 18.301 | 1.00 | 0.00  |
| ATOM | 1568 | LPG2 | CYS | 170 | -10.238 | -18.946 | 17.527 | 1.00 | 0.00  |
| ATOM | 1569 | HB2  | CYS | 170 | -7.559  | -18.289 | 17.429 | 1.00 | 0.04  |
| ATOM | 1570 | HB1  | CYS | 170 | -7.138  | -16.734 | 18.209 | 1.00 | 0.04  |
| ATOM | 1571 | HG   | CYS | 170 | -9.311  | -17.689 | 19.149 | 1.00 | 0.10  |
| ATOM | 1572 | H    | CYS | 170 | -9.030  | -18.142 | 15.360 | 1.00 | 0.19  |
| ATOM | 1573 | HA   | CYS | 170 | -8.207  | -15.475 | 16.379 | 1.00 | 0.08  |
| ATOM | 1574 | N    | ILE | 171 | -5.957  | -17.666 | 15.180 | 1.00 | -0.26 |
| ATOM | 1575 | CA   | ILE | 171 | -4.593  | -17.666 | 14.647 | 1.00 | 0.13  |

|      |      |      |     |     |        |         |        |      |       |
|------|------|------|-----|-----|--------|---------|--------|------|-------|
| ATOM | 1576 | C    | ILE | 171 | -4.485 | -16.710 | 13.483 | 1.00 | 0.20  |
| ATOM | 1577 | O    | ILE | 171 | -3.474 | -16.037 | 13.354 | 1.00 | -0.39 |
| ATOM | 1578 | CB   | ILE | 171 | -4.089 | -19.087 | 14.236 | 1.00 | 0.00  |
| ATOM | 1579 | CG1  | ILE | 171 | -2.558 | -19.062 | 13.939 | 1.00 | -0.05 |
| ATOM | 1580 | CG2  | ILE | 171 | -4.879 | -19.655 | 13.022 | 1.00 | -0.06 |
| ATOM | 1581 | CD1  | ILE | 171 | -1.941 | -20.463 | 13.681 | 1.00 | -0.06 |
| ATOM | 1582 | HB   | ILE | 171 | -4.255 | -19.751 | 15.102 | 1.00 | 0.03  |
| ATOM | 1583 | HG23 | ILE | 171 | -5.959 | -19.570 | 13.187 | 1.00 | 0.02  |
| ATOM | 1584 | HG22 | ILE | 171 | -4.660 | -20.722 | 12.871 | 1.00 | 0.02  |
| ATOM | 1585 | HG21 | ILE | 171 | -4.625 | -19.114 | 12.098 | 1.00 | 0.02  |
| ATOM | 1586 | HG12 | ILE | 171 | -2.030 | -18.624 | 14.803 | 1.00 | 0.03  |
| ATOM | 1587 | HG11 | ILE | 171 | -2.363 | -18.428 | 13.060 | 1.00 | 0.03  |
| ATOM | 1588 | HD13 | ILE | 171 | -2.186 | -21.150 | 14.505 | 1.00 | 0.02  |
| ATOM | 1589 | HD12 | ILE | 171 | -0.845 | -20.380 | 13.611 | 1.00 | 0.02  |
| ATOM | 1590 | HD11 | ILE | 171 | -2.303 | -20.895 | 12.736 | 1.00 | 0.02  |
| ATOM | 1591 | H    | ILE | 171 | -6.457 | -18.528 | 15.267 | 1.00 | 0.19  |
| ATOM | 1592 | HA   | ILE | 171 | -3.941 | -17.285 | 15.450 | 1.00 | 0.08  |
| ATOM | 1593 | N    | SER | 172 | -5.516 | -16.620 | 12.617 | 1.00 | -0.26 |
| ATOM | 1594 | CA   | SER | 172 | -5.407 | -15.722 | 11.472 | 1.00 | 0.15  |
| ATOM | 1595 | C    | SER | 172 | -5.215 | -14.297 | 11.940 | 1.00 | 0.21  |
| ATOM | 1596 | O    | SER | 172 | -4.171 | -13.708 | 11.706 | 1.00 | -0.39 |
| ATOM | 1597 | CB   | SER | 172 | -6.725 | -15.782 | 10.659 | 1.00 | 0.08  |
| ATOM | 1598 | OG   | SER | 172 | -7.783 | -15.489 | 11.587 | 1.00 | -0.39 |
| ATOM | 1599 | H    | SER | 172 | -6.376 | -17.126 | 12.756 | 1.00 | 0.19  |
| ATOM | 1600 | HA   | SER | 172 | -4.554 | -16.014 | 10.838 | 1.00 | 0.08  |
| ATOM | 1601 | HB2  | SER | 172 | -6.862 | -16.787 | 10.225 | 1.00 | 0.06  |
| ATOM | 1602 | HB1  | SER | 172 | -6.704 | -15.040 | 9.848  | 1.00 | 0.06  |
| ATOM | 1603 | HG   | SER | 172 | -8.645 | -15.410 | 11.186 | 1.00 | 0.21  |
| ATOM | 1604 | N    | VAL | 173 | -6.232 | -13.708 | 12.603 | 1.00 | -0.26 |
| ATOM | 1605 | CA   | VAL | 173 | -6.113 | -12.305 | 12.992 | 1.00 | 0.13  |
| ATOM | 1606 | C    | VAL | 173 | -4.907 | -12.106 | 13.881 | 1.00 | 0.20  |
| ATOM | 1607 | O    | VAL | 173 | -4.228 | -11.099 | 13.743 | 1.00 | -0.39 |
| ATOM | 1608 | CB   | VAL | 173 | -7.413 | -11.751 | 13.650 | 1.00 | -0.01 |
| ATOM | 1609 | CG1  | VAL | 173 | -7.651 | -12.331 | 15.072 | 1.00 | -0.06 |
| ATOM | 1610 | CG2  | VAL | 173 | -7.385 | -10.199 | 13.719 | 1.00 | -0.06 |
| ATOM | 1611 | HB   | VAL | 173 | -8.262 | -12.045 | 13.007 | 1.00 | 0.03  |
| ATOM | 1612 | HG23 | VAL | 173 | -6.558 | -9.866  | 14.360 | 1.00 | 0.02  |
| ATOM | 1613 | HG22 | VAL | 173 | -8.326 | -9.815  | 14.142 | 1.00 | 0.02  |
| ATOM | 1614 | HG21 | VAL | 173 | -7.250 | -9.760  | 12.718 | 1.00 | 0.02  |
| ATOM | 1615 | HG13 | VAL | 173 | -7.648 | -13.428 | 15.048 | 1.00 | 0.02  |
| ATOM | 1616 | HG12 | VAL | 173 | -8.628 | -12.001 | 15.457 | 1.00 | 0.02  |
| ATOM | 1617 | HG11 | VAL | 173 | -6.873 | -11.994 | 15.773 | 1.00 | 0.02  |
| ATOM | 1618 | H    | VAL | 173 | -7.076 | -14.222 | 12.794 | 1.00 | 0.19  |
| ATOM | 1619 | HA   | VAL | 173 | -5.940 | -11.739 | 12.063 | 1.00 | 0.08  |
| ATOM | 1620 | N    | LEU | 174 | -4.600 | -13.046 | 14.802 | 1.00 | -0.26 |
| ATOM | 1621 | CA   | LEU | 174 | -3.434 | -12.842 | 15.660 | 1.00 | 0.13  |
| ATOM | 1622 | C    | LEU | 174 | -2.178 | -12.823 | 14.819 | 1.00 | 0.20  |
| ATOM | 1623 | O    | LEU | 174 | -1.365 | -11.925 | 14.984 | 1.00 | -0.39 |
| ATOM | 1624 | CB   | LEU | 174 | -3.296 | -13.941 | 16.750 | 1.00 | -0.01 |
| ATOM | 1625 | CG   | LEU | 174 | -4.431 | -13.928 | 17.821 | 1.00 | -0.04 |
| ATOM | 1626 | CD1  | LEU | 174 | -4.380 | -15.243 | 18.648 | 1.00 | -0.06 |
| ATOM | 1627 | CD2  | LEU | 174 | -4.331 | -12.705 | 18.778 | 1.00 | -0.06 |
| ATOM | 1628 | H    | LEU | 174 | -5.131 | -13.899 | 14.883 | 1.00 | 0.19  |
| ATOM | 1629 | HA   | LEU | 174 | -3.508 | -11.854 | 16.140 | 1.00 | 0.08  |
| ATOM | 1630 | HB2  | LEU | 174 | -2.326 | -13.826 | 17.263 | 1.00 | 0.03  |
| ATOM | 1631 | HB1  | LEU | 174 | -3.282 | -14.912 | 16.231 | 1.00 | 0.03  |
| ATOM | 1632 | HG   | LEU | 174 | -5.415 | -13.881 | 17.326 | 1.00 | 0.03  |
| ATOM | 1633 | HD13 | LEU | 174 | -4.510 | -16.119 | 17.992 | 1.00 | 0.02  |

|      |      |         |     |        |         |        |      |       |
|------|------|---------|-----|--------|---------|--------|------|-------|
| ATOM | 1634 | HD12LEU | 174 | -5.183 | -15.261 | 19.402 | 1.00 | 0.02  |
| ATOM | 1635 | HD11LEU | 174 | -3.413 | -15.333 | 19.165 | 1.00 | 0.02  |
| ATOM | 1636 | HD23LEU | 174 | -3.344 | -12.677 | 19.266 | 1.00 | 0.02  |
| ATOM | 1637 | HD22LEU | 174 | -5.101 | -12.773 | 19.562 | 1.00 | 0.02  |
| ATOM | 1638 | HD21LEU | 174 | -4.488 | -11.756 | 18.247 | 1.00 | 0.02  |
| ATOM | 1639 | N VAL   | 175 | -1.976 | -13.795 | 13.903 | 1.00 | -0.26 |
| ATOM | 1640 | CA VAL  | 175 | -0.759 | -13.747 | 13.094 | 1.00 | 0.13  |
| ATOM | 1641 | C VAL   | 175 | -0.803 | -12.499 | 12.241 | 1.00 | 0.20  |
| ATOM | 1642 | O VAL   | 175 | 0.224  | -11.857 | 12.086 | 1.00 | -0.39 |
| ATOM | 1643 | CB VAL  | 175 | -0.509 | -15.042 | 12.268 | 1.00 | -0.01 |
| ATOM | 1644 | CG1 VAL | 175 | 0.726  | -14.894 | 11.333 | 1.00 | -0.06 |
| ATOM | 1645 | CG2 VAL | 175 | -0.256 | -16.246 | 13.221 | 1.00 | -0.06 |
| ATOM | 1646 | H VAL   | 175 | -2.665 | -14.508 | 13.724 | 1.00 | 0.19  |
| ATOM | 1647 | HA VAL  | 175 | 0.101  | -13.646 | 13.771 | 1.00 | 0.08  |
| ATOM | 1648 | HB VAL  | 175 | -1.404 | -15.236 | 11.650 | 1.00 | 0.03  |
| ATOM | 1649 | HG13VAL | 175 | 0.599  | -14.071 | 10.619 | 1.00 | 0.02  |
| ATOM | 1650 | HG12VAL | 175 | 0.881  | -15.819 | 10.756 | 1.00 | 0.02  |
| ATOM | 1651 | HG11VAL | 175 | 1.634  | -14.694 | 11.923 | 1.00 | 0.02  |
| ATOM | 1652 | HG23VAL | 175 | 0.681  | -16.106 | 13.782 | 1.00 | 0.02  |
| ATOM | 1653 | HG22VAL | 175 | -0.175 | -17.179 | 12.642 | 1.00 | 0.02  |
| ATOM | 1654 | HG21VAL | 175 | -1.066 | -16.359 | 13.954 | 1.00 | 0.02  |
| ATOM | 1655 | N TRP   | 176 | -1.966 | -12.104 | 11.680 | 1.00 | -0.26 |
| ATOM | 1656 | CA TRP  | 176 | -1.988 | -10.875 | 10.886 | 1.00 | 0.14  |
| ATOM | 1657 | C TRP   | 176 | -1.575 | -9.703  | 11.754 | 1.00 | 0.21  |
| ATOM | 1658 | O TRP   | 176 | -0.754 | -8.903  | 11.331 | 1.00 | -0.39 |
| ATOM | 1659 | CB TRP  | 176 | -3.370 | -10.603 | 10.236 | 1.00 | 0.00  |
| ATOM | 1660 | CG TRP  | 176 | -4.006 | -11.771 | 9.514  | 1.00 | -0.04 |
| ATOM | 1661 | CD1 TRP | 176 | -5.297 | -11.813 | 9.143  | 1.00 | 0.02  |
| ATOM | 1662 | CD2 TRP | 176 | -3.394 | -13.085 | 9.079  | 1.00 | -0.02 |
| ATOM | 1663 | NE1 TRP | 176 | -5.560 | -12.961 | 8.574  | 1.00 | -0.29 |
| ATOM | 1664 | CE2 TRP | 176 | -4.477 | -13.761 | 8.549  | 1.00 | 0.06  |
| ATOM | 1665 | CE3 TRP | 176 | -2.129 | -13.673 | 9.109  | 1.00 | -0.07 |
| ATOM | 1666 | CZ2 TRP | 176 | -4.377 | -15.077 | 8.094  | 1.00 | -0.04 |
| ATOM | 1667 | CZ3 TRP | 176 | -2.002 | -14.980 | 8.624  | 1.00 | -0.08 |
| ATOM | 1668 | CH2 TRP | 176 | -3.109 | -15.669 | 8.108  | 1.00 | -0.08 |
| ATOM | 1669 | H TRP   | 176 | -2.816 | -12.629 | 11.812 | 1.00 | 0.19  |
| ATOM | 1670 | HA TRP  | 176 | -1.246 | -10.940 | 10.076 | 1.00 | 0.08  |
| ATOM | 1671 | HB2 TRP | 176 | -3.277 | -9.765  | 9.526  | 1.00 | 0.04  |
| ATOM | 1672 | HB1 TRP | 176 | -4.066 | -10.294 | 11.030 | 1.00 | 0.04  |
| ATOM | 1673 | HD1 TRP | 176 | -6.014 | -11.006 | 9.299  | 1.00 | 0.08  |
| ATOM | 1674 | HE1 TRP | 176 | -6.483 | -13.220 | 8.198  | 1.00 | 0.22  |
| ATOM | 1675 | HE3 TRP | 176 | -1.266 | -13.149 | 9.482  | 1.00 | 0.05  |
| ATOM | 1676 | HZ2 TRP | 176 | -5.245 | -15.627 | 7.751  | 1.00 | 0.05  |
| ATOM | 1677 | HZ3 TRP | 176 | -1.033 | -15.468 | 8.646  | 1.00 | 0.05  |
| ATOM | 1678 | HH2 TRP | 176 | -2.976 | -16.672 | 7.717  | 1.00 | 0.05  |
| ATOM | 1679 | N LEU   | 177 | -2.118 | -9.570  | 12.983 | 1.00 | -0.26 |
| ATOM | 1680 | CA LEU  | 177 | -1.698 | -8.459  | 13.839 | 1.00 | 0.13  |
| ATOM | 1681 | C LEU   | 177 | -0.222 | -8.568  | 14.162 | 1.00 | 0.20  |
| ATOM | 1682 | O LEU   | 177 | 0.483  | -7.573  | 14.071 | 1.00 | -0.39 |
| ATOM | 1683 | CB LEU  | 177 | -2.496 | -8.412  | 15.174 | 1.00 | -0.01 |
| ATOM | 1684 | CG LEU  | 177 | -3.992 | -8.008  | 14.996 | 1.00 | -0.04 |
| ATOM | 1685 | CD1 LEU | 177 | -4.801 | -8.407  | 16.263 | 1.00 | -0.06 |
| ATOM | 1686 | CD2 LEU | 177 | -4.163 | -6.484  | 14.733 | 1.00 | -0.06 |
| ATOM | 1687 | HB2 LEU | 177 | -2.426 | -9.411  | 15.631 | 1.00 | 0.03  |
| ATOM | 1688 | HB1 LEU | 177 | -2.020 | -7.699  | 15.867 | 1.00 | 0.03  |
| ATOM | 1689 | HG LEU  | 177 | -4.415 | -8.550  | 14.134 | 1.00 | 0.03  |
| ATOM | 1690 | HD13LEU | 177 | -4.769 | -9.497  | 16.416 | 1.00 | 0.02  |
| ATOM | 1691 | HD12LEU | 177 | -5.856 | -8.108  | 16.163 | 1.00 | 0.02  |

|      |      |         |     |        |         |        |      |       |
|------|------|---------|-----|--------|---------|--------|------|-------|
| ATOM | 1692 | HD11LEU | 177 | -4.382 | -7.915  | 17.154 | 1.00 | 0.02  |
| ATOM | 1693 | HD23LEU | 177 | -3.765 | -5.900  | 15.576 | 1.00 | 0.02  |
| ATOM | 1694 | HD22LEU | 177 | -5.230 | -6.237  | 14.614 | 1.00 | 0.02  |
| ATOM | 1695 | HD21LEU | 177 | -3.645 | -6.169  | 13.817 | 1.00 | 0.02  |
| ATOM | 1696 | H LEU   | 177 | -2.779 | -10.247 | 13.329 | 1.00 | 0.19  |
| ATOM | 1697 | HA LEU  | 177 | -1.834 | -7.517  | 13.288 | 1.00 | 0.08  |
| ATOM | 1698 | N ILE   | 178 | 0.271  | -9.768  | 14.543 | 1.00 | -0.26 |
| ATOM | 1699 | CA ILE  | 178 | 1.703  | -9.902  | 14.823 | 1.00 | 0.13  |
| ATOM | 1700 | C ILE   | 178 | 2.464  | -9.447  | 13.597 | 1.00 | 0.20  |
| ATOM | 1701 | O ILE   | 178 | 3.406  | -8.673  | 13.698 | 1.00 | -0.39 |
| ATOM | 1702 | CB ILE  | 178 | 2.113  | -11.353 | 15.223 | 1.00 | 0.00  |
| ATOM | 1703 | CG1 ILE | 178 | 1.524  | -11.713 | 16.625 | 1.00 | -0.05 |
| ATOM | 1704 | CG2 ILE | 178 | 3.662  | -11.520 | 15.205 | 1.00 | -0.06 |
| ATOM | 1705 | CD1 ILE | 178 | 1.522  | -13.235 | 16.934 | 1.00 | -0.06 |
| ATOM | 1706 | HB ILE  | 178 | 1.701  | -12.032 | 14.463 | 1.00 | 0.03  |
| ATOM | 1707 | H ILE   | 178 | -0.328 | -10.577 | 14.588 | 1.00 | 0.19  |
| ATOM | 1708 | HA ILE  | 178 | 1.970  | -9.252  | 15.666 | 1.00 | 0.08  |
| ATOM | 1709 | HG23ILE | 178 | 4.072  | -11.344 | 14.199 | 1.00 | 0.02  |
| ATOM | 1710 | HG22ILE | 178 | 3.960  | -12.536 | 15.497 | 1.00 | 0.02  |
| ATOM | 1711 | HG21ILE | 178 | 4.129  | -10.805 | 15.900 | 1.00 | 0.02  |
| ATOM | 1712 | HG12ILE | 178 | 0.479  | -11.372 | 16.695 | 1.00 | 0.03  |
| ATOM | 1713 | HG11ILE | 178 | 2.090  | -11.183 | 17.408 | 1.00 | 0.03  |
| ATOM | 1714 | HD13ILE | 178 | 0.969  | -13.785 | 16.158 | 1.00 | 0.02  |
| ATOM | 1715 | HD12ILE | 178 | 1.026  | -13.416 | 17.901 | 1.00 | 0.02  |
| ATOM | 1716 | HD11ILE | 178 | 2.541  | -13.641 | 16.999 | 1.00 | 0.02  |
| ATOM | 1717 | N VAL   | 179 | 2.065  | -9.934  | 12.405 | 1.00 | -0.26 |
| ATOM | 1718 | CA VAL  | 179 | 2.787  | -9.554  | 11.196 | 1.00 | 0.13  |
| ATOM | 1719 | C VAL   | 179 | 2.662  | -8.066  | 10.957 | 1.00 | 0.20  |
| ATOM | 1720 | O VAL   | 179 | 3.657  | -7.459  | 10.594 | 1.00 | -0.39 |
| ATOM | 1721 | CB VAL  | 179 | 2.363  | -10.430 | 9.982  | 1.00 | -0.01 |
| ATOM | 1722 | CG1 VAL | 179 | 2.900  | -9.852  | 8.645  | 1.00 | -0.06 |
| ATOM | 1723 | CG2 VAL | 179 | 2.894  | -11.879 | 10.185 | 1.00 | -0.06 |
| ATOM | 1724 | H VAL   | 179 | 1.264  | -10.538 | 12.335 | 1.00 | 0.19  |
| ATOM | 1725 | HA VAL  | 179 | 3.856  | -9.748  | 11.369 | 1.00 | 0.08  |
| ATOM | 1726 | HB VAL  | 179 | 1.262  | -10.442 | 9.919  | 1.00 | 0.03  |
| ATOM | 1727 | HG13VAL | 179 | 2.476  | -8.854  | 8.464  | 1.00 | 0.02  |
| ATOM | 1728 | HG12VAL | 179 | 2.615  | -10.495 | 7.800  | 1.00 | 0.02  |
| ATOM | 1729 | HG11VAL | 179 | 3.997  | -9.779  | 8.674  | 1.00 | 0.02  |
| ATOM | 1730 | HG23VAL | 179 | 3.994  | -11.897 | 10.148 | 1.00 | 0.02  |
| ATOM | 1731 | HG22VAL | 179 | 2.518  | -12.543 | 9.398  | 1.00 | 0.02  |
| ATOM | 1732 | HG21VAL | 179 | 2.580  | -12.288 | 11.155 | 1.00 | 0.02  |
| ATOM | 1733 | N VAL   | 180 | 1.492  | -7.420  | 11.154 | 1.00 | -0.26 |
| ATOM | 1734 | CA VAL  | 180 | 1.454  | -5.964  | 10.989 | 1.00 | 0.13  |
| ATOM | 1735 | C VAL   | 180 | 2.494  | -5.328  | 11.884 | 1.00 | 0.20  |
| ATOM | 1736 | O VAL   | 180 | 3.320  | -4.566  | 11.398 | 1.00 | -0.39 |
| ATOM | 1737 | CB VAL  | 180 | 0.061  | -5.329  | 11.293 | 1.00 | -0.01 |
| ATOM | 1738 | CG1 VAL | 180 | 0.144  | -3.780  | 11.437 | 1.00 | -0.06 |
| ATOM | 1739 | CG2 VAL | 180 | -0.949 | -5.675  | 10.167 | 1.00 | -0.06 |
| ATOM | 1740 | H VAL   | 180 | 0.670  | -7.922  | 11.444 | 1.00 | 0.19  |
| ATOM | 1741 | HA VAL  | 180 | 1.724  | -5.722  | 9.949  | 1.00 | 0.08  |
| ATOM | 1742 | HB VAL  | 180 | -0.313 | -5.736  | 12.247 | 1.00 | 0.03  |
| ATOM | 1743 | HG13VAL | 180 | 0.740  | -3.488  | 12.316 | 1.00 | 0.02  |
| ATOM | 1744 | HG12VAL | 180 | -0.863 | -3.352  | 11.562 | 1.00 | 0.02  |
| ATOM | 1745 | HG11VAL | 180 | 0.604  | -3.335  | 10.540 | 1.00 | 0.02  |
| ATOM | 1746 | HG23VAL | 180 | -0.629 | -5.194  | 9.230  | 1.00 | 0.02  |
| ATOM | 1747 | HG22VAL | 180 | -1.958 | -5.316  | 10.421 | 1.00 | 0.02  |
| ATOM | 1748 | HG21VAL | 180 | -1.002 | -6.760  | 10.005 | 1.00 | 0.02  |
| ATOM | 1749 | N VAL   | 181 | 2.476  | -5.609  | 13.206 | 1.00 | -0.26 |

|      |      |      |     |     |        |        |        |      |       |
|------|------|------|-----|-----|--------|--------|--------|------|-------|
| ATOM | 1750 | CA   | VAL | 181 | 3.443  | -4.937 | 14.075 | 1.00 | 0.13  |
| ATOM | 1751 | C    | VAL | 181 | 4.856  | -5.397 | 13.787 | 1.00 | 0.20  |
| ATOM | 1752 | O    | VAL | 181 | 5.766  | -4.664 | 14.136 | 1.00 | -0.39 |
| ATOM | 1753 | CB   | VAL | 181 | 3.135  | -4.975 | 15.601 | 1.00 | -0.01 |
| ATOM | 1754 | CG1  | VAL | 181 | 1.750  | -4.337 | 15.906 | 1.00 | -0.06 |
| ATOM | 1755 | CG2  | VAL | 181 | 3.215  | -6.408 | 16.186 | 1.00 | -0.06 |
| ATOM | 1756 | HB   | VAL | 181 | 3.906  | -4.371 | 16.114 | 1.00 | 0.03  |
| ATOM | 1757 | H    | VAL | 181 | 1.835  | -6.289 | 13.580 | 1.00 | 0.19  |
| ATOM | 1758 | HA   | VAL | 181 | 3.434  | -3.868 | 13.803 | 1.00 | 0.08  |
| ATOM | 1759 | HG23 | VAL | 181 | 2.383  | -7.003 | 15.797 | 1.00 | 0.02  |
| ATOM | 1760 | HG22 | VAL | 181 | 3.132  | -6.382 | 17.284 | 1.00 | 0.02  |
| ATOM | 1761 | HG21 | VAL | 181 | 4.163  | -6.900 | 15.919 | 1.00 | 0.02  |
| ATOM | 1762 | HG13 | VAL | 181 | 1.712  | -3.300 | 15.538 | 1.00 | 0.02  |
| ATOM | 1763 | HG12 | VAL | 181 | 1.569  | -4.324 | 16.992 | 1.00 | 0.02  |
| ATOM | 1764 | HG11 | VAL | 181 | 0.939  | -4.905 | 15.427 | 1.00 | 0.02  |
| ATOM | 1765 | N    | ALA | 182 | 5.094  | -6.571 | 13.159 | 1.00 | -0.26 |
| ATOM | 1766 | CA   | ALA | 182 | 6.446  | -6.874 | 12.682 | 1.00 | 0.13  |
| ATOM | 1767 | C    | ALA | 182 | 6.760  | -6.116 | 11.405 | 1.00 | 0.20  |
| ATOM | 1768 | O    | ALA | 182 | 7.891  | -5.694 | 11.226 | 1.00 | -0.39 |
| ATOM | 1769 | CB   | ALA | 182 | 6.615  | -8.387 | 12.394 | 1.00 | -0.02 |
| ATOM | 1770 | HB3  | ALA | 182 | 5.988  | -8.681 | 11.540 | 1.00 | 0.03  |
| ATOM | 1771 | HB2  | ALA | 182 | 6.320  | -8.976 | 13.276 | 1.00 | 0.03  |
| ATOM | 1772 | HB1  | ALA | 182 | 7.664  | -8.614 | 12.147 | 1.00 | 0.03  |
| ATOM | 1773 | H    | ALA | 182 | 4.349  | -7.219 | 12.966 | 1.00 | 0.19  |
| ATOM | 1774 | HA   | ALA | 182 | 7.185  | -6.591 | 13.451 | 1.00 | 0.08  |
| ATOM | 1775 | N    | ILE | 183 | 5.791  | -5.928 | 10.482 | 1.00 | -0.26 |
| ATOM | 1776 | CA   | ILE | 183 | 6.072  | -5.176 | 9.255  | 1.00 | 0.13  |
| ATOM | 1777 | C    | ILE | 183 | 6.324  | -3.719 | 9.586  | 1.00 | 0.20  |
| ATOM | 1778 | O    | ILE | 183 | 7.276  | -3.144 | 9.078  | 1.00 | -0.39 |
| ATOM | 1779 | CB   | ILE | 183 | 4.923  | -5.327 | 8.204  | 1.00 | 0.00  |
| ATOM | 1780 | CG1  | ILE | 183 | 4.973  | -6.753 | 7.570  | 1.00 | -0.05 |
| ATOM | 1781 | CG2  | ILE | 183 | 5.000  | -4.232 | 7.105  | 1.00 | -0.06 |
| ATOM | 1782 | CD1  | ILE | 183 | 3.817  | -7.051 | 6.575  | 1.00 | -0.06 |
| ATOM | 1783 | H    | ILE | 183 | 4.863  | -6.277 | 10.644 | 1.00 | 0.19  |
| ATOM | 1784 | HA   | ILE | 183 | 7.001  | -5.559 | 8.803  | 1.00 | 0.08  |
| ATOM | 1785 | HB   | ILE | 183 | 3.958  | -5.187 | 8.718  | 1.00 | 0.03  |
| ATOM | 1786 | HG12 | ILE | 183 | 4.932  | -7.492 | 8.383  | 1.00 | 0.03  |
| ATOM | 1787 | HG11 | ILE | 183 | 5.928  | -6.898 | 7.040  | 1.00 | 0.03  |
| ATOM | 1788 | HG23 | ILE | 183 | 4.968  | -3.223 | 7.543  | 1.00 | 0.02  |
| ATOM | 1789 | HG22 | ILE | 183 | 4.152  | -4.296 | 6.408  | 1.00 | 0.02  |
| ATOM | 1790 | HG21 | ILE | 183 | 5.935  | -4.352 | 6.541  | 1.00 | 0.02  |
| ATOM | 1791 | HD13 | ILE | 183 | 2.846  | -6.795 | 7.025  | 1.00 | 0.02  |
| ATOM | 1792 | HD12 | ILE | 183 | 3.814  | -8.121 | 6.314  | 1.00 | 0.02  |
| ATOM | 1793 | HD11 | ILE | 183 | 3.934  | -6.488 | 5.637  | 1.00 | 0.02  |
| ATOM | 1794 | N    | SER | 184 | 5.467  | -3.090 | 10.418 | 1.00 | -0.26 |
| ATOM | 1795 | CA   | SER | 184 | 5.634  | -1.661 | 10.697 | 1.00 | 0.15  |
| ATOM | 1796 | C    | SER | 184 | 7.068  | -1.199 | 10.916 | 1.00 | 0.21  |
| ATOM | 1797 | O    | SER | 184 | 7.506  | -0.347 | 10.155 | 1.00 | -0.39 |
| ATOM | 1798 | CB   | SER | 184 | 4.698  | -1.217 | 11.852 | 1.00 | 0.08  |
| ATOM | 1799 | OG   | SER | 184 | 3.329  | -1.344 | 11.424 | 1.00 | -0.39 |
| ATOM | 1800 | HB2  | SER | 184 | 4.856  | -1.853 | 12.734 | 1.00 | 0.06  |
| ATOM | 1801 | HB1  | SER | 184 | 4.918  | -0.173 | 12.125 | 1.00 | 0.06  |
| ATOM | 1802 | HG   | SER | 184 | 2.696  | -1.099 | 12.093 | 1.00 | 0.21  |
| ATOM | 1803 | H    | SER | 184 | 4.671  | -3.575 | 10.804 | 1.00 | 0.19  |
| ATOM | 1804 | HA   | SER | 184 | 5.288  | -1.130 | 9.797  | 1.00 | 0.08  |
| ATOM | 1805 | N    | PRO | 185 | 7.874  | -1.683 | 11.895 | 1.00 | -0.25 |
| ATOM | 1806 | CA   | PRO | 185 | 9.232  | -1.176 | 12.014 | 1.00 | 0.13  |
| ATOM | 1807 | C    | PRO | 185 | 10.031 | -1.476 | 10.766 | 1.00 | 0.20  |

|      |      |         |     |        |        |        |      |       |
|------|------|---------|-----|--------|--------|--------|------|-------|
| ATOM | 1808 | O PRO   | 185 | 10.894 | -0.689 | 10.410 | 1.00 | -0.39 |
| ATOM | 1809 | CB PRO  | 185 | 9.733  | -1.972 | 13.247 | 1.00 | -0.01 |
| ATOM | 1810 | CG PRO  | 185 | 8.862  | -3.249 | 13.266 | 1.00 | -0.03 |
| ATOM | 1811 | CD PRO  | 185 | 7.475  | -2.738 | 12.811 | 1.00 | 0.04  |
| ATOM | 1812 | HA PRO  | 185 | 9.236  | -0.098 | 12.230 | 1.00 | 0.08  |
| ATOM | 1813 | HB2 PRO | 185 | 9.524  | -1.399 | 14.166 | 1.00 | 0.03  |
| ATOM | 1814 | HB1 PRO | 185 | 10.809 | -2.197 | 13.208 | 1.00 | 0.03  |
| ATOM | 1815 | HG1 PRO | 185 | 9.267  | -3.966 | 12.536 | 1.00 | 0.03  |
| ATOM | 1816 | HG2 PRO | 185 | 8.832  | -3.741 | 14.252 | 1.00 | 0.03  |
| ATOM | 1817 | HD1 PRO | 185 | 6.895  | -3.540 | 12.340 | 1.00 | 0.05  |
| ATOM | 1818 | HD2 PRO | 185 | 6.941  | -2.316 | 13.676 | 1.00 | 0.05  |
| ATOM | 1819 | N ILE   | 186 | 9.769  | -2.601 | 10.066 | 1.00 | -0.26 |
| ATOM | 1820 | CA ILE  | 186 | 10.597 | -2.936 | 8.912  | 1.00 | 0.13  |
| ATOM | 1821 | C ILE   | 186 | 10.374 | -1.879 | 7.860  | 1.00 | 0.20  |
| ATOM | 1822 | O ILE   | 186 | 11.342 | -1.283 | 7.417  | 1.00 | -0.39 |
| ATOM | 1823 | CB ILE  | 186 | 10.318 | -4.371 | 8.368  | 1.00 | 0.00  |
| ATOM | 1824 | CG1 ILE | 186 | 10.773 | -5.434 | 9.417  | 1.00 | -0.05 |
| ATOM | 1825 | CG2 ILE | 186 | 11.016 | -4.585 | 6.997  | 1.00 | -0.06 |
| ATOM | 1826 | CD1 ILE | 186 | 10.308 | -6.880 | 9.094  | 1.00 | -0.06 |
| ATOM | 1827 | H ILE   | 186 | 8.977  | -3.180 | 10.275 | 1.00 | 0.19  |
| ATOM | 1828 | HA ILE  | 186 | 11.659 | -2.889 | 9.210  | 1.00 | 0.08  |
| ATOM | 1829 | HB ILE  | 186 | 9.236  | -4.477 | 8.198  | 1.00 | 0.03  |
| ATOM | 1830 | HG12ILE | 186 | 10.357 | -5.173 | 10.403 | 1.00 | 0.03  |
| ATOM | 1831 | HG11ILE | 186 | 11.872 | -5.420 | 9.507  | 1.00 | 0.03  |
| ATOM | 1832 | HG23ILE | 186 | 10.660 | -3.858 | 6.251  | 1.00 | 0.02  |
| ATOM | 1833 | HG22ILE | 186 | 10.797 | -5.585 | 6.598  | 1.00 | 0.02  |
| ATOM | 1834 | HG21ILE | 186 | 12.105 | -4.470 | 7.105  | 1.00 | 0.02  |
| ATOM | 1835 | HD13ILE | 186 | 9.220  | -6.909 | 8.933  | 1.00 | 0.02  |
| ATOM | 1836 | HD12ILE | 186 | 10.548 | -7.544 | 9.940  | 1.00 | 0.02  |
| ATOM | 1837 | HD11ILE | 186 | 10.811 | -7.282 | 8.203  | 1.00 | 0.02  |
| ATOM | 1838 | N LEU   | 187 | 9.123  | -1.609 | 7.434  | 1.00 | -0.26 |
| ATOM | 1839 | CA LEU  | 187 | 8.933  | -0.586 | 6.401  | 1.00 | 0.13  |
| ATOM | 1840 | C LEU   | 187 | 9.200  | 0.793  | 6.958  | 1.00 | 0.20  |
| ATOM | 1841 | O LEU   | 187 | 9.667  | 1.654  | 6.223  | 1.00 | -0.39 |
| ATOM | 1842 | CB LEU  | 187 | 7.516  | -0.644 | 5.778  | 1.00 | -0.01 |
| ATOM | 1843 | CG LEU  | 187 | 7.263  | -1.951 | 4.971  | 1.00 | -0.04 |
| ATOM | 1844 | CD1 LEU | 187 | 5.762  | -2.035 | 4.598  | 1.00 | -0.06 |
| ATOM | 1845 | CD2 LEU | 187 | 8.096  | -2.038 | 3.659  | 1.00 | -0.06 |
| ATOM | 1846 | H LEU   | 187 | 8.332  | -2.068 | 7.858  | 1.00 | 0.19  |
| ATOM | 1847 | HA LEU  | 187 | 9.682  | -0.722 | 5.605  | 1.00 | 0.08  |
| ATOM | 1848 | HB2 LEU | 187 | 7.365  | 0.213  | 5.106  | 1.00 | 0.03  |
| ATOM | 1849 | HB1 LEU | 187 | 6.793  | -0.554 | 6.606  | 1.00 | 0.03  |
| ATOM | 1850 | HG LEU  | 187 | 7.524  | -2.816 | 5.603  | 1.00 | 0.03  |
| ATOM | 1851 | HD13LEU | 187 | 5.122  | -1.934 | 5.485  | 1.00 | 0.02  |
| ATOM | 1852 | HD12LEU | 187 | 5.558  | -3.009 | 4.129  | 1.00 | 0.02  |
| ATOM | 1853 | HD11LEU | 187 | 5.501  | -1.228 | 3.896  | 1.00 | 0.02  |
| ATOM | 1854 | HD23LEU | 187 | 7.928  | -1.140 | 3.047  | 1.00 | 0.02  |
| ATOM | 1855 | HD22LEU | 187 | 7.800  | -2.919 | 3.069  | 1.00 | 0.02  |
| ATOM | 1856 | HD21LEU | 187 | 9.171  | -2.133 | 3.860  | 1.00 | 0.02  |
| ATOM | 1857 | N PHE   | 188 | 8.948  | 1.056  | 8.260  | 1.00 | -0.26 |
| ATOM | 1858 | CA PHE  | 188 | 9.424  | 2.327  | 8.800  | 1.00 | 0.14  |
| ATOM | 1859 | C PHE   | 188 | 10.897 | 2.418  | 8.466  | 1.00 | 0.21  |
| ATOM | 1860 | O PHE   | 188 | 11.334 | 3.478  | 8.041  | 1.00 | -0.39 |
| ATOM | 1861 | CB PHE  | 188 | 9.222  | 2.467  | 10.328 | 1.00 | 0.02  |
| ATOM | 1862 | CG PHE  | 188 | 7.757  | 2.454  | 10.803 | 1.00 | -0.04 |
| ATOM | 1863 | CD1 PHE | 188 | 6.656  | 2.388  | 9.936  | 1.00 | -0.06 |
| ATOM | 1864 | CD2 PHE | 188 | 7.522  | 2.511  | 12.182 | 1.00 | -0.06 |
| ATOM | 1865 | CE1 PHE | 188 | 5.353  | 2.375  | 10.441 | 1.00 | -0.07 |

|      |      |     |     |     |        |        |        |      |       |
|------|------|-----|-----|-----|--------|--------|--------|------|-------|
| ATOM | 1866 | CE2 | PHE | 188 | 6.220  | 2.515  | 12.690 | 1.00 | -0.07 |
| ATOM | 1867 | CZ  | PHE | 188 | 5.131  | 2.453  | 11.818 | 1.00 | -0.07 |
| ATOM | 1868 | H   | PHE | 188 | 8.522  | 0.383  | 8.879  | 1.00 | 0.19  |
| ATOM | 1869 | HA  | PHE | 188 | 8.918  | 3.164  | 8.291  | 1.00 | 0.08  |
| ATOM | 1870 | HB2 | PHE | 188 | 9.676  | 3.410  | 10.668 | 1.00 | 0.05  |
| ATOM | 1871 | HB1 | PHE | 188 | 9.772  | 1.650  | 10.810 | 1.00 | 0.05  |
| ATOM | 1872 | HD1 | PHE | 188 | 6.780  | 2.340  | 8.862  | 1.00 | 0.06  |
| ATOM | 1873 | HD2 | PHE | 188 | 8.359  | 2.554  | 12.872 | 1.00 | 0.06  |
| ATOM | 1874 | HE1 | PHE | 188 | 4.509  | 2.305  | 9.762  | 1.00 | 0.06  |
| ATOM | 1875 | HE2 | PHE | 188 | 6.054  | 2.568  | 13.762 | 1.00 | 0.06  |
| ATOM | 1876 | HZ  | PHE | 188 | 4.117  | 2.462  | 12.207 | 1.00 | 0.06  |
| ATOM | 1877 | N   | TYR | 189 | 11.688 | 1.329  | 8.593  | 1.00 | -0.26 |
| ATOM | 1878 | CA  | TYR | 189 | 13.089 | 1.397  | 8.173  | 1.00 | 0.14  |
| ATOM | 1879 | C   | TYR | 189 | 13.227 | 1.295  | 6.659  | 1.00 | 0.21  |
| ATOM | 1880 | O   | TYR | 189 | 13.583 | 2.282  | 6.030  | 1.00 | -0.39 |
| ATOM | 1881 | CB  | TYR | 189 | 13.951 | 0.343  | 8.925  | 1.00 | 0.02  |
| ATOM | 1882 | CG  | TYR | 189 | 13.608 | 0.225  | 10.423 | 1.00 | -0.05 |
| ATOM | 1883 | CD1 | TYR | 189 | 13.121 | 1.307  | 11.170 | 1.00 | -0.07 |
| ATOM | 1884 | CD2 | TYR | 189 | 13.770 | -1.010 | 11.062 | 1.00 | -0.07 |
| ATOM | 1885 | CE1 | TYR | 189 | 12.695 | 1.128  | 12.490 | 1.00 | -0.04 |
| ATOM | 1886 | CE2 | TYR | 189 | 13.367 | -1.185 | 12.389 | 1.00 | -0.04 |
| ATOM | 1887 | CZ  | TYR | 189 | 12.807 | -0.125 | 13.104 | 1.00 | 0.08  |
| ATOM | 1888 | OH  | TYR | 189 | 12.371 | -0.338 | 14.415 | 1.00 | -0.34 |
| ATOM | 1889 | H   | TYR | 189 | 11.328 | 0.452  | 8.937  | 1.00 | 0.19  |
| ATOM | 1890 | HA  | TYR | 189 | 13.507 | 2.379  | 8.450  | 1.00 | 0.08  |
| ATOM | 1891 | HB1 | TYR | 189 | 15.024 | 0.571  | 8.820  | 1.00 | 0.05  |
| ATOM | 1892 | HB2 | TYR | 189 | 13.771 | -0.642 | 8.471  | 1.00 | 0.05  |
| ATOM | 1893 | HD1 | TYR | 189 | 13.060 | 2.300  | 10.742 | 1.00 | 0.05  |
| ATOM | 1894 | HD2 | TYR | 189 | 14.206 | -1.849 | 10.529 | 1.00 | 0.05  |
| ATOM | 1895 | HE1 | TYR | 189 | 12.277 | 1.970  | 13.032 | 1.00 | 0.05  |
| ATOM | 1896 | HE2 | TYR | 189 | 13.487 | -2.150 | 12.870 | 1.00 | 0.05  |
| ATOM | 1897 | HH  | TYR | 189 | 12.142 | 0.457  | 14.883 | 1.00 | 0.25  |
| ATOM | 1898 | N   | SER | 190 | 12.947 | 0.147  | 6.003  | 1.00 | -0.26 |
| ATOM | 1899 | CA  | SER | 190 | 13.256 | 0.000  | 4.576  | 1.00 | 0.16  |
| ATOM | 1900 | C   | SER | 190 | 12.354 | 0.814  | 3.679  | 1.00 | 0.25  |
| ATOM | 1901 | O   | SER | 190 | 11.489 | 1.544  | 4.135  | 1.00 | -0.33 |
| ATOM | 1902 | CB  | SER | 190 | 13.145 | -1.485 | 4.138  | 1.00 | 0.08  |
| ATOM | 1903 | OG  | SER | 190 | 11.775 | -1.893 | 4.281  | 1.00 | -0.39 |
| ATOM | 1904 | H   | SER | 190 | 12.508 | -0.622 | 6.475  | 1.00 | 0.19  |
| ATOM | 1905 | HA  | SER | 190 | 14.290 | 0.339  | 4.396  | 1.00 | 0.08  |
| ATOM | 1906 | HB2 | SER | 190 | 13.800 | -2.105 | 4.773  | 1.00 | 0.06  |
| ATOM | 1907 | HB1 | SER | 190 | 13.465 | -1.599 | 3.087  | 1.00 | 0.06  |
| ATOM | 1908 | HG  | SER | 190 | 11.626 | -2.798 | 4.026  | 1.00 | 0.21  |
| TER  | 1909 |     | SER | 190 |        |        |        |      |       |
| ATOM | 1910 | C   | ACE | 214 | 19.128 | 2.680  | -2.048 | 1.00 | 0.18  |
| ATOM | 1911 | O   | ACE | 214 | 18.709 | 1.584  | -1.714 | 1.00 | -0.40 |
| ATOM | 1912 | CH3 | ACE | 214 | 20.208 | 3.322  | -1.216 | 1.00 | 0.03  |
| ATOM | 1913 | H   | ACE | 214 | 20.319 | 2.797  | -0.256 | 1.00 | 0.05  |
| ATOM | 1914 | H   | ACE | 214 | 19.952 | 4.372  | -1.009 | 1.00 | 0.05  |
| ATOM | 1915 | H   | ACE | 214 | 21.162 | 3.281  | -1.762 | 1.00 | 0.05  |
| ATOM | 1916 | N   | PHE | 215 | 18.673 | 3.340  | -3.137 | 1.00 | -0.26 |
| ATOM | 1917 | CA  | PHE | 215 | 17.555 | 2.805  | -3.919 | 1.00 | 0.14  |
| ATOM | 1918 | C   | PHE | 215 | 17.686 | 1.322  | -4.188 | 1.00 | 0.21  |
| ATOM | 1919 | O   | PHE | 215 | 16.735 | 0.597  | -3.950 | 1.00 | -0.39 |
| ATOM | 1920 | CB  | PHE | 215 | 17.386 | 3.526  | -5.284 | 1.00 | 0.02  |
| ATOM | 1921 | CG  | PHE | 215 | 16.986 | 4.994  | -5.083 | 1.00 | -0.04 |
| ATOM | 1922 | CD1 | PHE | 215 | 15.661 | 5.308  | -4.759 | 1.00 | -0.06 |
| ATOM | 1923 | CD2 | PHE | 215 | 17.921 | 6.027  | -5.223 | 1.00 | -0.06 |

|      |      |         |     |        |        |        |      |       |
|------|------|---------|-----|--------|--------|--------|------|-------|
| ATOM | 1924 | CE1 PHE | 215 | 15.268 | 6.638  | -4.589 | 1.00 | -0.07 |
| ATOM | 1925 | CE2 PHE | 215 | 17.536 | 7.356  | -5.029 | 1.00 | -0.07 |
| ATOM | 1926 | CZ PHE  | 215 | 16.210 | 7.663  | -4.712 | 1.00 | -0.07 |
| ATOM | 1927 | H PHE   | 215 | 19.048 | 4.236  | -3.377 | 1.00 | 0.19  |
| ATOM | 1928 | HA PHE  | 215 | 16.635 | 2.957  | -3.335 | 1.00 | 0.08  |
| ATOM | 1929 | HB2 PHE | 215 | 16.585 | 3.045  | -5.867 | 1.00 | 0.05  |
| ATOM | 1930 | HB1 PHE | 215 | 18.317 | 3.451  | -5.866 | 1.00 | 0.05  |
| ATOM | 1931 | HD1 PHE | 215 | 14.927 | 4.518  | -4.641 | 1.00 | 0.06  |
| ATOM | 1932 | HD2 PHE | 215 | 18.950 | 5.804  | -5.485 | 1.00 | 0.06  |
| ATOM | 1933 | HE1 PHE | 215 | 14.232 | 6.871  | -4.362 | 1.00 | 0.06  |
| ATOM | 1934 | HE2 PHE | 215 | 18.267 | 8.153  | -5.125 | 1.00 | 0.06  |
| ATOM | 1935 | HZ PHE  | 215 | 15.913 | 8.696  | -4.562 | 1.00 | 0.06  |
| ATOM | 1936 | N ILE   | 216 | 18.835 | 0.823  | -4.689 | 1.00 | -0.26 |
| ATOM | 1937 | CA ILE  | 216 | 18.940 | -0.621 | -4.918 | 1.00 | 0.13  |
| ATOM | 1938 | C ILE   | 216 | 18.625 | -1.385 | -3.652 | 1.00 | 0.20  |
| ATOM | 1939 | O ILE   | 216 | 17.959 | -2.407 | -3.715 | 1.00 | -0.39 |
| ATOM | 1940 | CB ILE  | 216 | 20.332 | -1.059 | -5.476 | 1.00 | 0.00  |
| ATOM | 1941 | CG1 ILE | 216 | 20.276 | -2.542 | -5.962 | 1.00 | -0.05 |
| ATOM | 1942 | CG2 ILE | 216 | 21.472 | -0.850 | -4.436 | 1.00 | -0.06 |
| ATOM | 1943 | CD1 ILE | 216 | 21.586 | -3.026 | -6.640 | 1.00 | -0.06 |
| ATOM | 1944 | HB ILE  | 216 | 20.543 | -0.423 | -6.352 | 1.00 | 0.03  |
| ATOM | 1945 | HG23ILE | 216 | 21.441 | 0.159  | -3.999 | 1.00 | 0.02  |
| ATOM | 1946 | HG22ILE | 216 | 22.460 | -0.964 | -4.906 | 1.00 | 0.02  |
| ATOM | 1947 | HG21ILE | 216 | 21.391 | -1.587 | -3.624 | 1.00 | 0.02  |
| ATOM | 1948 | H ILE   | 216 | 19.606 | 1.425  | -4.895 | 1.00 | 0.19  |
| ATOM | 1949 | HA ILE  | 216 | 18.168 | -0.886 | -5.659 | 1.00 | 0.08  |
| ATOM | 1950 | HG12ILE | 216 | 19.462 | -2.647 | -6.699 | 1.00 | 0.03  |
| ATOM | 1951 | HG11ILE | 216 | 20.053 | -3.212 | -5.116 | 1.00 | 0.03  |
| ATOM | 1952 | HD13ILE | 216 | 21.885 | -2.332 | -7.441 | 1.00 | 0.02  |
| ATOM | 1953 | HD12ILE | 216 | 21.430 | -4.023 | -7.084 | 1.00 | 0.02  |
| ATOM | 1954 | HD11ILE | 216 | 22.407 | -3.110 | -5.913 | 1.00 | 0.02  |
| ATOM | 1955 | N TYR   | 217 | 19.095 | -0.912 | -2.479 | 1.00 | -0.26 |
| ATOM | 1956 | CA TYR  | 217 | 18.884 | -1.672 | -1.254 | 1.00 | 0.14  |
| ATOM | 1957 | C TYR   | 217 | 17.466 | -1.476 | -0.788 | 1.00 | 0.21  |
| ATOM | 1958 | O TYR   | 217 | 16.823 | -2.459 | -0.460 | 1.00 | -0.39 |
| ATOM | 1959 | CB TYR  | 217 | 19.875 | -1.243 | -0.141 | 1.00 | 0.02  |
| ATOM | 1960 | CG TYR  | 217 | 21.306 | -1.410 | -0.670 | 1.00 | -0.05 |
| ATOM | 1961 | CD1 TYR | 217 | 21.867 | -2.688 | -0.766 | 1.00 | -0.07 |
| ATOM | 1962 | CD2 TYR | 217 | 22.059 | -0.301 | -1.071 | 1.00 | -0.07 |
| ATOM | 1963 | CE1 TYR | 217 | 23.147 | -2.862 | -1.303 | 1.00 | -0.04 |
| ATOM | 1964 | CE2 TYR | 217 | 23.338 | -0.474 | -1.606 | 1.00 | -0.04 |
| ATOM | 1965 | CZ TYR  | 217 | 23.885 | -1.753 | -1.735 | 1.00 | 0.08  |
| ATOM | 1966 | OH TYR  | 217 | 25.159 | -1.896 | -2.293 | 1.00 | -0.34 |
| ATOM | 1967 | H TYR   | 217 | 19.531 | -0.012 | -2.415 | 1.00 | 0.19  |
| ATOM | 1968 | HA TYR  | 217 | 19.044 | -2.745 | -1.453 | 1.00 | 0.08  |
| ATOM | 1969 | HB1 TYR | 217 | 19.733 | -1.871 | 0.753  | 1.00 | 0.05  |
| ATOM | 1970 | HB2 TYR | 217 | 19.686 | -0.198 | 0.151  | 1.00 | 0.05  |
| ATOM | 1971 | HD1 TYR | 217 | 21.309 | -3.555 | -0.426 | 1.00 | 0.05  |
| ATOM | 1972 | HD2 TYR | 217 | 21.656 | 0.700  | -0.974 | 1.00 | 0.05  |
| ATOM | 1973 | HE1 TYR | 217 | 23.558 | -3.863 | -1.380 | 1.00 | 0.05  |
| ATOM | 1974 | HE2 TYR | 217 | 23.914 | 0.387  | -1.927 | 1.00 | 0.05  |
| ATOM | 1975 | HH TYR  | 217 | 25.476 | -2.791 | -2.322 | 1.00 | 0.25  |
| ATOM | 1976 | N SER   | 218 | 16.948 | -0.228 | -0.748 | 1.00 | -0.26 |
| ATOM | 1977 | CA SER  | 218 | 15.567 | -0.059 | -0.309 | 1.00 | 0.15  |
| ATOM | 1978 | C SER   | 218 | 14.674 | -0.821 | -1.253 | 1.00 | 0.21  |
| ATOM | 1979 | O SER   | 218 | 13.846 | -1.581 | -0.778 | 1.00 | -0.39 |
| ATOM | 1980 | CB SER  | 218 | 15.091 | 1.417  | -0.285 | 1.00 | 0.08  |
| ATOM | 1981 | OG SER  | 218 | 15.042 | 1.944  | -1.624 | 1.00 | -0.39 |

|      |      |      |     |     |        |        |        |      |       |
|------|------|------|-----|-----|--------|--------|--------|------|-------|
| ATOM | 1982 | H    | SER | 218 | 17.470 | 0.574  | -1.057 | 1.00 | 0.19  |
| ATOM | 1983 | HA   | SER | 218 | 15.465 | -0.482 | 0.705  | 1.00 | 0.08  |
| ATOM | 1984 | HB2  | SER | 218 | 15.778 | 2.009  | 0.342  | 1.00 | 0.06  |
| ATOM | 1985 | HB1  | SER | 218 | 14.081 | 1.454  | 0.160  | 1.00 | 0.06  |
| ATOM | 1986 | HG   | SER | 218 | 14.716 | 2.839  | -1.663 | 1.00 | 0.21  |
| ATOM | 1987 | N    | MET | 219 | 14.833 | -0.637 | -2.583 | 1.00 | -0.26 |
| ATOM | 1988 | CA   | MET | 219 | 14.026 | -1.405 | -3.525 | 1.00 | 0.13  |
| ATOM | 1989 | C    | MET | 219 | 14.212 | -2.883 | -3.260 | 1.00 | 0.20  |
| ATOM | 1990 | O    | MET | 219 | 13.231 | -3.582 | -3.068 | 1.00 | -0.39 |
| ATOM | 1991 | CB   | MET | 219 | 14.360 | -1.143 | -5.020 | 1.00 | 0.00  |
| ATOM | 1992 | CG   | MET | 219 | 13.936 | 0.272  | -5.500 | 1.00 | 0.00  |
| ATOM | 1993 | SD   | MET | 219 | 14.160 | 0.413  | -7.307 | 1.00 | -0.16 |
| ATOM | 1994 | CE   | MET | 219 | 15.948 | 0.176  | -7.542 | 1.00 | -0.02 |
| ATOM | 1995 | H    | MET | 219 | 15.520 | 0.008  | -2.932 | 1.00 | 0.19  |
| ATOM | 1996 | HA   | MET | 219 | 12.968 | -1.142 | -3.381 | 1.00 | 0.08  |
| ATOM | 1997 | HB2  | MET | 219 | 13.816 | -1.879 | -5.636 | 1.00 | 0.03  |
| ATOM | 1998 | HB1  | MET | 219 | 15.438 | -1.296 | -5.178 | 1.00 | 0.03  |
| ATOM | 1999 | HG2  | MET | 219 | 14.504 | 1.069  | -5.000 | 1.00 | 0.04  |
| ATOM | 2000 | HG1  | MET | 219 | 12.865 | 0.437  | -5.303 | 1.00 | 0.04  |
| ATOM | 2001 | LPD2 | MET | 219 | 14.393 | 1.981  | -6.546 | 1.00 | 0.00  |
| ATOM | 2002 | LPD1 | MET | 219 | 14.962 | 2.594  | -5.818 | 1.00 | 0.00  |
| ATOM | 2003 | HE3  | MET | 219 | 16.223 | 0.543  | -8.542 | 1.00 | 0.03  |
| ATOM | 2004 | HE2  | MET | 219 | 16.198 | -0.892 | -7.474 | 1.00 | 0.03  |
| ATOM | 2005 | HE1  | MET | 219 | 16.509 | 0.739  | -6.785 | 1.00 | 0.03  |
| ATOM | 2006 | N    | CYS | 220 | 15.455 | -3.408 | -3.255 | 1.00 | -0.26 |
| ATOM | 2007 | CA   | CYS | 220 | 15.608 | -4.855 | -3.104 | 1.00 | 0.14  |
| ATOM | 2008 | C    | CYS | 220 | 15.001 | -5.339 | -1.806 | 1.00 | 0.20  |
| ATOM | 2009 | O    | CYS | 220 | 14.224 | -6.283 | -1.815 | 1.00 | -0.39 |
| ATOM | 2010 | CB   | CYS | 220 | 17.100 | -5.277 | -3.149 | 1.00 | 0.03  |
| ATOM | 2011 | SG   | CYS | 220 | 17.230 | -7.089 | -2.977 | 1.00 | -0.17 |
| ATOM | 2012 | H    | CYS | 220 | 16.273 | -2.832 | -3.365 | 1.00 | 0.19  |
| ATOM | 2013 | HA   | CYS | 220 | 15.084 | -5.354 | -3.936 | 1.00 | 0.08  |
| ATOM | 2014 | HB2  | CYS | 220 | 17.657 | -4.794 | -2.331 | 1.00 | 0.04  |
| ATOM | 2015 | HB1  | CYS | 220 | 17.546 | -4.976 | -4.111 | 1.00 | 0.04  |
| ATOM | 2016 | LPG2 | CYS | 220 | 16.446 | -6.302 | -3.919 | 1.00 | 0.00  |
| ATOM | 2017 | LPG1 | CYS | 220 | 16.466 | -6.469 | -2.823 | 1.00 | 0.00  |
| ATOM | 2018 | HG   | CYS | 220 | 18.235 | -7.172 | -3.022 | 1.00 | 0.10  |
| ATOM | 2019 | N    | THR | 221 | 15.347 | -4.714 | -0.662 | 1.00 | -0.26 |
| ATOM | 2020 | CA   | THR | 221 | 14.848 | -5.233 | 0.608  | 1.00 | 0.16  |
| ATOM | 2021 | C    | THR | 221 | 13.364 | -4.990 | 0.698  | 1.00 | 0.21  |
| ATOM | 2022 | O    | THR | 221 | 12.634 | -5.904 | 1.044  | 1.00 | -0.39 |
| ATOM | 2023 | CB   | THR | 221 | 15.534 | -4.580 | 1.839  | 1.00 | 0.09  |
| ATOM | 2024 | OG1  | THR | 221 | 15.325 | -3.156 | 1.796  | 1.00 | -0.39 |
| ATOM | 2025 | CG2  | THR | 221 | 17.050 | -4.920 | 1.883  | 1.00 | -0.03 |
| ATOM | 2026 | H    | THR | 221 | 15.905 | -3.877 | -0.663 | 1.00 | 0.19  |
| ATOM | 2027 | HA   | THR | 221 | 15.022 | -6.321 | 0.650  | 1.00 | 0.08  |
| ATOM | 2028 | HB   | THR | 221 | 15.060 | -4.983 | 2.752  | 1.00 | 0.06  |
| ATOM | 2029 | HG1  | THR | 221 | 15.761 | -2.697 | 2.506  | 1.00 | 0.21  |
| ATOM | 2030 | HG22 | THR | 221 | 17.508 | -4.488 | 2.785  | 1.00 | 0.03  |
| ATOM | 2031 | HG21 | THR | 221 | 17.573 | -4.516 | 1.004  | 1.00 | 0.03  |
| ATOM | 2032 | HG23 | THR | 221 | 17.199 | -6.010 | 1.908  | 1.00 | 0.03  |
| ATOM | 2033 | N    | THR | 222 | 12.876 | -3.770 | 0.400  | 1.00 | -0.26 |
| ATOM | 2034 | CA   | THR | 222 | 11.440 | -3.536 | 0.533  | 1.00 | 0.16  |
| ATOM | 2035 | C    | THR | 222 | 10.678 | -4.383 | -0.463 | 1.00 | 0.21  |
| ATOM | 2036 | O    | THR | 222 | 9.608  | -4.858 | -0.119 | 1.00 | -0.39 |
| ATOM | 2037 | CB   | THR | 222 | 11.058 | -2.034 | 0.430  | 1.00 | 0.09  |
| ATOM | 2038 | OG1  | THR | 222 | 9.817  | -1.792 | 1.119  | 1.00 | -0.39 |
| ATOM | 2039 | CG2  | THR | 222 | 10.913 | -1.574 | -1.040 | 1.00 | -0.03 |

|      |      |      |     |     |        |         |        |      |       |
|------|------|------|-----|-----|--------|---------|--------|------|-------|
| ATOM | 2040 | H    | THR | 222 | 13.482 | -3.033  | 0.077  | 1.00 | 0.19  |
| ATOM | 2041 | HA   | THR | 222 | 11.146 | -3.843  | 1.548  | 1.00 | 0.08  |
| ATOM | 2042 | HB   | THR | 222 | 11.851 | -1.460  | 0.940  | 1.00 | 0.06  |
| ATOM | 2043 | HG1  | THR | 222 | 9.554  | -0.877  | 1.105  | 1.00 | 0.21  |
| ATOM | 2044 | HG22 | THR | 222 | 9.934  | -1.859  | -1.449 | 1.00 | 0.03  |
| ATOM | 2045 | HG21 | THR | 222 | 11.681 | -2.014  | -1.675 | 1.00 | 0.03  |
| ATOM | 2046 | HG23 | THR | 222 | 11.029 | -0.487  | -1.085 | 1.00 | 0.03  |
| ATOM | 2047 | N    | VAL | 223 | 11.181 | -4.614  | -1.699 | 1.00 | -0.26 |
| ATOM | 2048 | CA   | VAL | 223 | 10.428 | -5.447  | -2.637 | 1.00 | 0.13  |
| ATOM | 2049 | C    | VAL | 223 | 10.488 | -6.875  | -2.148 | 1.00 | 0.20  |
| ATOM | 2050 | O    | VAL | 223 | 9.454  | -7.521  | -2.080 | 1.00 | -0.39 |
| ATOM | 2051 | CB   | VAL | 223 | 10.899 | -5.309  | -4.115 | 1.00 | -0.01 |
| ATOM | 2052 | CG1  | VAL | 223 | 10.219 | -6.371  | -5.025 | 1.00 | -0.06 |
| ATOM | 2053 | CG2  | VAL | 223 | 10.573 | -3.885  | -4.656 | 1.00 | -0.06 |
| ATOM | 2054 | H    | VAL | 223 | 12.091 | -4.288  | -1.976 | 1.00 | 0.19  |
| ATOM | 2055 | HA   | VAL | 223 | 9.374  | -5.139  | -2.629 | 1.00 | 0.08  |
| ATOM | 2056 | HB   | VAL | 223 | 11.988 | -5.483  | -4.159 | 1.00 | 0.03  |
| ATOM | 2057 | HG13 | VAL | 223 | 10.508 | -7.391  | -4.728 | 1.00 | 0.02  |
| ATOM | 2058 | HG12 | VAL | 223 | 10.523 | -6.227  | -6.074 | 1.00 | 0.02  |
| ATOM | 2059 | HG11 | VAL | 223 | 9.123  | -6.286  | -4.964 | 1.00 | 0.02  |
| ATOM | 2060 | HG23 | VAL | 223 | 9.484  | -3.738  | -4.716 | 1.00 | 0.02  |
| ATOM | 2061 | HG22 | VAL | 223 | 10.998 | -3.749  | -5.662 | 1.00 | 0.02  |
| ATOM | 2062 | HG21 | VAL | 223 | 10.981 | -3.100  | -4.004 | 1.00 | 0.02  |
| ATOM | 2063 | N    | ALA | 224 | 11.680 | -7.399  | -1.790 | 1.00 | -0.26 |
| ATOM | 2064 | CA   | ALA | 224 | 11.719 | -8.762  | -1.262 | 1.00 | 0.13  |
| ATOM | 2065 | C    | ALA | 224 | 10.807 | -8.864  | -0.058 | 1.00 | 0.20  |
| ATOM | 2066 | O    | ALA | 224 | 9.996  | -9.774  | 0.019  | 1.00 | -0.39 |
| ATOM | 2067 | CB   | ALA | 224 | 13.158 | -9.173  | -0.858 | 1.00 | -0.02 |
| ATOM | 2068 | HB3  | ALA | 224 | 13.550 | -8.497  | -0.083 | 1.00 | 0.03  |
| ATOM | 2069 | HB2  | ALA | 224 | 13.823 | -9.126  | -1.734 | 1.00 | 0.03  |
| ATOM | 2070 | HB1  | ALA | 224 | 13.163 | -10.202 | -0.465 | 1.00 | 0.03  |
| ATOM | 2071 | H    | ALA | 224 | 12.534 | -6.867  | -1.850 | 1.00 | 0.19  |
| ATOM | 2072 | HA   | ALA | 224 | 11.353 | -9.456  | -2.038 | 1.00 | 0.08  |
| ATOM | 2073 | N    | MET | 225 | 10.907 | -7.922  | 0.903  | 1.00 | -0.26 |
| ATOM | 2074 | CA   | MET | 225 | 10.033 | -7.980  | 2.075  | 1.00 | 0.13  |
| ATOM | 2075 | C    | MET | 225 | 8.590  | -7.868  | 1.633  | 1.00 | 0.20  |
| ATOM | 2076 | O    | MET | 225 | 7.769  | -8.639  | 2.103  | 1.00 | -0.39 |
| ATOM | 2077 | CB   | MET | 225 | 10.383 | -6.854  | 3.085  | 1.00 | 0.00  |
| ATOM | 2078 | CG   | MET | 225 | 11.778 | -7.090  | 3.731  | 1.00 | 0.00  |
| ATOM | 2079 | SD   | MET | 225 | 12.479 | -5.499  | 4.277  | 1.00 | -0.16 |
| ATOM | 2080 | CE   | MET | 225 | 13.895 | -6.083  | 5.258  | 1.00 | -0.02 |
| ATOM | 2081 | H    | MET | 225 | 11.548 | -7.156  | 0.796  | 1.00 | 0.19  |
| ATOM | 2082 | HA   | MET | 225 | 10.160 | -8.954  | 2.576  | 1.00 | 0.08  |
| ATOM | 2083 | HB2  | MET | 225 | 9.621  | -6.801  | 3.881  | 1.00 | 0.03  |
| ATOM | 2084 | HB1  | MET | 225 | 10.359 | -5.898  | 2.543  | 1.00 | 0.03  |
| ATOM | 2085 | HG2  | MET | 225 | 12.496 | -7.524  | 3.020  | 1.00 | 0.04  |
| ATOM | 2086 | HG1  | MET | 225 | 11.688 | -7.778  | 4.586  | 1.00 | 0.04  |
| ATOM | 2087 | LPD2 | MET | 225 | 9.733  | -3.597  | 5.125  | 1.00 | 0.00  |
| ATOM | 2088 | LPD1 | MET | 225 | 10.536 | -3.373  | 4.394  | 1.00 | 0.00  |
| ATOM | 2089 | HE3  | MET | 225 | 13.534 | -6.649  | 6.130  | 1.00 | 0.03  |
| ATOM | 2090 | HE2  | MET | 225 | 14.473 | -5.214  | 5.604  | 1.00 | 0.03  |
| ATOM | 2091 | HE1  | MET | 225 | 14.539 | -6.730  | 4.644  | 1.00 | 0.03  |
| ATOM | 2092 | N    | PHE | 226 | 8.242  | -6.941  | 0.713  | 1.00 | -0.26 |
| ATOM | 2093 | CA   | PHE | 226 | 6.861  | -6.871  | 0.237  | 1.00 | 0.14  |
| ATOM | 2094 | C    | PHE | 226 | 6.381  | -8.171  | -0.379 | 1.00 | 0.21  |
| ATOM | 2095 | O    | PHE | 226 | 5.184  | -8.269  | -0.605 | 1.00 | -0.39 |
| ATOM | 2096 | CB   | PHE | 226 | 6.596  | -5.727  | -0.787 | 1.00 | 0.02  |
| ATOM | 2097 | CG   | PHE | 226 | 6.471  | -4.298  | -0.224 | 1.00 | -0.04 |

|      |      |      |     |     |       |         |        |      |       |
|------|------|------|-----|-----|-------|---------|--------|------|-------|
| ATOM | 2098 | CD1  | PHE | 226 | 5.581 | -4.010  | 0.819  | 1.00 | -0.06 |
| ATOM | 2099 | CD2  | PHE | 226 | 7.210 | -3.244  | -0.776 | 1.00 | -0.06 |
| ATOM | 2100 | CE1  | PHE | 226 | 5.322 | -2.688  | 1.188  | 1.00 | -0.07 |
| ATOM | 2101 | CE2  | PHE | 226 | 7.011 | -1.926  | -0.353 | 1.00 | -0.07 |
| ATOM | 2102 | CZ   | PHE | 226 | 6.051 | -1.641  | 0.620  | 1.00 | -0.07 |
| ATOM | 2103 | H    | PHE | 226 | 8.919 | -6.312  | 0.324  | 1.00 | 0.19  |
| ATOM | 2104 | HA   | PHE | 226 | 6.219 | -6.743  | 1.119  | 1.00 | 0.08  |
| ATOM | 2105 | HB2  | PHE | 226 | 5.628 | -5.883  | -1.280 | 1.00 | 0.05  |
| ATOM | 2106 | HB1  | PHE | 226 | 7.358 | -5.797  | -1.574 | 1.00 | 0.05  |
| ATOM | 2107 | HD1  | PHE | 226 | 5.066 | -4.800  | 1.351  | 1.00 | 0.06  |
| ATOM | 2108 | HD2  | PHE | 226 | 7.941 | -3.438  | -1.552 | 1.00 | 0.06  |
| ATOM | 2109 | HE1  | PHE | 226 | 4.548 | -2.477  | 1.915  | 1.00 | 0.06  |
| ATOM | 2110 | HE2  | PHE | 226 | 7.598 | -1.121  | -0.781 | 1.00 | 0.06  |
| ATOM | 2111 | HZ   | PHE | 226 | 5.871 | -0.617  | 0.931  | 1.00 | 0.06  |
| ATOM | 2112 | N    | CYS | 227 | 7.218 | -9.194  | -0.656 | 1.00 | -0.26 |
| ATOM | 2113 | CA   | CYS | 227 | 6.652 | -10.487 | -1.040 | 1.00 | 0.14  |
| ATOM | 2114 | C    | CYS | 227 | 5.915 | -11.125 | 0.123  | 1.00 | 0.20  |
| ATOM | 2115 | O    | CYS | 227 | 4.849 | -11.684 | -0.089 | 1.00 | -0.39 |
| ATOM | 2116 | CB   | CYS | 227 | 7.758 | -11.476 | -1.494 | 1.00 | 0.03  |
| ATOM | 2117 | SG   | CYS | 227 | 6.987 | -13.029 | -2.068 | 1.00 | -0.17 |
| ATOM | 2118 | H    | CYS | 227 | 8.214 | -9.112  | -0.554 | 1.00 | 0.19  |
| ATOM | 2119 | HA   | CYS | 227 | 5.949 | -10.347 | -1.878 | 1.00 | 0.08  |
| ATOM | 2120 | HB2  | CYS | 227 | 8.436 | -11.702 | -0.656 | 1.00 | 0.04  |
| ATOM | 2121 | HB1  | CYS | 227 | 8.342 | -11.031 | -2.316 | 1.00 | 0.04  |
| ATOM | 2122 | LPG2 | CYS | 227 | 6.808 | -12.153 | -3.440 | 1.00 | 0.00  |
| ATOM | 2123 | LPG1 | CYS | 227 | 7.056 | -12.664 | -2.488 | 1.00 | 0.00  |
| ATOM | 2124 | HG   | CYS | 227 | 7.828 | -13.540 | -2.292 | 1.00 | 0.10  |
| ATOM | 2125 | N    | VAL | 228 | 6.457 | -11.081 | 1.365  | 1.00 | -0.26 |
| ATOM | 2126 | CA   | VAL | 228 | 5.845 | -11.869 | 2.438  | 1.00 | 0.13  |
| ATOM | 2127 | C    | VAL | 228 | 4.362 | -11.605 | 2.645  | 1.00 | 0.21  |
| ATOM | 2128 | O    | VAL | 228 | 3.653 | -12.594 | 2.781  | 1.00 | -0.39 |
| ATOM | 2129 | CB   | VAL | 228 | 6.622 | -11.991 | 3.788  | 1.00 | -0.01 |
| ATOM | 2130 | CG1  | VAL | 228 | 8.106 | -12.407 | 3.572  | 1.00 | -0.06 |
| ATOM | 2131 | CG2  | VAL | 228 | 6.539 | -10.723 | 4.678  | 1.00 | -0.06 |
| ATOM | 2132 | HB   | VAL | 228 | 6.142 | -12.803 | 4.367  | 1.00 | 0.03  |
| ATOM | 2133 | HG23 | VAL | 228 | 6.956 | -9.854  | 4.152  | 1.00 | 0.02  |
| ATOM | 2134 | HG22 | VAL | 228 | 5.495 | -10.519 | 4.960  | 1.00 | 0.02  |
| ATOM | 2135 | HG21 | VAL | 228 | 7.112 | -10.870 | 5.607  | 1.00 | 0.02  |
| ATOM | 2136 | HG13 | VAL | 228 | 8.171 | -13.298 | 2.928  | 1.00 | 0.02  |
| ATOM | 2137 | HG12 | VAL | 228 | 8.576 | -12.652 | 4.538  | 1.00 | 0.02  |
| ATOM | 2138 | HG11 | VAL | 228 | 8.690 | -11.597 | 3.111  | 1.00 | 0.02  |
| ATOM | 2139 | H    | VAL | 228 | 7.279 | -10.535 | 1.552  | 1.00 | 0.19  |
| ATOM | 2140 | HA   | VAL | 228 | 5.888 | -12.894 | 2.038  | 1.00 | 0.08  |
| ATOM | 2141 | N    | PRO | 229 | 3.780 | -10.374 | 2.674  | 1.00 | -0.25 |
| ATOM | 2142 | CA   | PRO | 229 | 2.336 | -10.291 | 2.800  | 1.00 | 0.13  |
| ATOM | 2143 | C    | PRO | 229 | 1.639 | -10.971 | 1.645  | 1.00 | 0.20  |
| ATOM | 2144 | O    | PRO | 229 | 0.519 | -11.399 | 1.855  | 1.00 | -0.39 |
| ATOM | 2145 | CB   | PRO | 229 | 2.115 | -8.758  | 2.801  | 1.00 | -0.01 |
| ATOM | 2146 | CG   | PRO | 229 | 3.340 | -8.215  | 2.035  | 1.00 | -0.03 |
| ATOM | 2147 | CD   | PRO | 229 | 4.494 | -9.110  | 2.546  | 1.00 | 0.04  |
| ATOM | 2148 | HA   | PRO | 229 | 1.992 | -10.720 | 3.754  | 1.00 | 0.08  |
| ATOM | 2149 | HB2  | PRO | 229 | 2.158 | -8.376  | 3.835  | 1.00 | 0.03  |
| ATOM | 2150 | HB1  | PRO | 229 | 1.154 | -8.457  | 2.353  | 1.00 | 0.03  |
| ATOM | 2151 | HG1  | PRO | 229 | 3.182 | -8.383  | 0.958  | 1.00 | 0.03  |
| ATOM | 2152 | HG2  | PRO | 229 | 3.519 | -7.140  | 2.202  | 1.00 | 0.03  |
| ATOM | 2153 | HD1  | PRO | 229 | 5.320 | -9.089  | 1.837  | 1.00 | 0.05  |
| ATOM | 2154 | HD2  | PRO | 229 | 4.829 | -8.737  | 3.525  | 1.00 | 0.05  |
| ATOM | 2155 | N    | LEU | 230 | 2.207 | -11.121 | 0.426  | 1.00 | -0.26 |

|      |      |      |     |     |        |         |        |      |       |
|------|------|------|-----|-----|--------|---------|--------|------|-------|
| ATOM | 2156 | CA   | LEU | 230 | 1.428  | -11.762 | -0.638 | 1.00 | 0.13  |
| ATOM | 2157 | C    | LEU | 230 | 1.348  | -13.246 | -0.389 | 1.00 | 0.20  |
| ATOM | 2158 | O    | LEU | 230 | 0.246  | -13.764 | -0.310 | 1.00 | -0.39 |
| ATOM | 2159 | CB   | LEU | 230 | 1.950  | -11.496 | -2.078 | 1.00 | -0.01 |
| ATOM | 2160 | CG   | LEU | 230 | 1.391  | -10.168 | -2.665 | 1.00 | -0.04 |
| ATOM | 2161 | CD1  | LEU | 230 | 1.726  | -8.965  | -1.743 | 1.00 | -0.06 |
| ATOM | 2162 | CD2  | LEU | 230 | 1.942  | -9.946  | -4.101 | 1.00 | -0.06 |
| ATOM | 2163 | HB2  | LEU | 230 | 3.051  | -11.500 | -2.090 | 1.00 | 0.03  |
| ATOM | 2164 | HB1  | LEU | 230 | 1.607  | -12.312 | -2.736 | 1.00 | 0.03  |
| ATOM | 2165 | HG   | LEU | 230 | 0.291  | -10.245 | -2.742 | 1.00 | 0.03  |
| ATOM | 2166 | HD13 | LEU | 230 | 1.277  | -9.072  | -0.746 | 1.00 | 0.02  |
| ATOM | 2167 | HD12 | LEU | 230 | 1.325  | -8.039  | -2.170 | 1.00 | 0.02  |
| ATOM | 2168 | HD11 | LEU | 230 | 2.817  | -8.873  | -1.635 | 1.00 | 0.02  |
| ATOM | 2169 | HD23 | LEU | 230 | 3.030  | -9.784  | -4.076 | 1.00 | 0.02  |
| ATOM | 2170 | HD22 | LEU | 230 | 1.464  | -9.074  | -4.570 | 1.00 | 0.02  |
| ATOM | 2171 | HD21 | LEU | 230 | 1.733  | -10.822 | -4.736 | 1.00 | 0.02  |
| ATOM | 2172 | H    | LEU | 230 | 3.161  | -10.860 | 0.251  | 1.00 | 0.19  |
| ATOM | 2173 | HA   | LEU | 230 | 0.387  | -11.400 | -0.604 | 1.00 | 0.08  |
| ATOM | 2174 | N    | VAL | 231 | 2.475  | -13.977 | -0.265 | 1.00 | -0.26 |
| ATOM | 2175 | CA   | VAL | 231 | 2.332  | -15.413 | -0.016 | 1.00 | 0.13  |
| ATOM | 2176 | C    | VAL | 231 | 1.531  | -15.607 | 1.255  | 1.00 | 0.20  |
| ATOM | 2177 | O    | VAL | 231 | 0.729  | -16.526 | 1.317  | 1.00 | -0.39 |
| ATOM | 2178 | CB   | VAL | 231 | 3.653  | -16.238 | 0.008  | 1.00 | -0.01 |
| ATOM | 2179 | CG1  | VAL | 231 | 4.386  | -16.158 | -1.361 | 1.00 | -0.06 |
| ATOM | 2180 | CG2  | VAL | 231 | 4.604  | -15.822 | 1.161  | 1.00 | -0.06 |
| ATOM | 2181 | HB   | VAL | 231 | 3.377  | -17.296 | 0.176  | 1.00 | 0.03  |
| ATOM | 2182 | HG23 | VAL | 231 | 4.930  | -14.785 | 1.025  | 1.00 | 0.02  |
| ATOM | 2183 | HG22 | VAL | 231 | 5.499  | -16.465 | 1.168  | 1.00 | 0.02  |
| ATOM | 2184 | HG21 | VAL | 231 | 4.111  | -15.916 | 2.140  | 1.00 | 0.02  |
| ATOM | 2185 | HG13 | VAL | 231 | 3.725  | -16.493 | -2.175 | 1.00 | 0.02  |
| ATOM | 2186 | HG12 | VAL | 231 | 5.277  | -16.805 | -1.356 | 1.00 | 0.02  |
| ATOM | 2187 | HG11 | VAL | 231 | 4.710  | -15.129 | -1.578 | 1.00 | 0.02  |
| ATOM | 2188 | H    | VAL | 231 | 3.375  | -13.538 | -0.305 | 1.00 | 0.19  |
| ATOM | 2189 | HA   | VAL | 231 | 1.716  | -15.827 | -0.833 | 1.00 | 0.08  |
| ATOM | 2190 | N    | LEU | 232 | 1.702  | -14.748 | 2.284  | 1.00 | -0.26 |
| ATOM | 2191 | CA   | LEU | 232 | 0.857  | -14.887 | 3.471  | 1.00 | 0.13  |
| ATOM | 2192 | C    | LEU | 232 | -0.586 | -14.582 | 3.146  | 1.00 | 0.20  |
| ATOM | 2193 | O    | LEU | 232 | -1.446 | -15.330 | 3.578  | 1.00 | -0.39 |
| ATOM | 2194 | CB   | LEU | 232 | 1.371  | -13.976 | 4.618  | 1.00 | -0.01 |
| ATOM | 2195 | CG   | LEU | 232 | 0.472  | -13.963 | 5.894  | 1.00 | -0.04 |
| ATOM | 2196 | CD1  | LEU | 232 | 1.356  | -13.681 | 7.137  | 1.00 | -0.06 |
| ATOM | 2197 | CD2  | LEU | 232 | -0.646 | -12.879 | 5.823  | 1.00 | -0.06 |
| ATOM | 2198 | HB2  | LEU | 232 | 2.385  | -14.335 | 4.859  | 1.00 | 0.03  |
| ATOM | 2199 | HB1  | LEU | 232 | 1.466  | -12.949 | 4.248  | 1.00 | 0.03  |
| ATOM | 2200 | HG   | LEU | 232 | 0.006  | -14.955 | 6.034  | 1.00 | 0.03  |
| ATOM | 2201 | HD13 | LEU | 232 | 2.101  | -14.479 | 7.284  | 1.00 | 0.02  |
| ATOM | 2202 | HD12 | LEU | 232 | 0.741  | -13.621 | 8.046  | 1.00 | 0.02  |
| ATOM | 2203 | HD11 | LEU | 232 | 1.884  | -12.727 | 6.999  | 1.00 | 0.02  |
| ATOM | 2204 | HD23 | LEU | 232 | -0.209 | -11.879 | 5.675  | 1.00 | 0.02  |
| ATOM | 2205 | HD22 | LEU | 232 | -1.224 | -12.857 | 6.756  | 1.00 | 0.02  |
| ATOM | 2206 | HD21 | LEU | 232 | -1.359 | -13.067 | 5.014  | 1.00 | 0.02  |
| ATOM | 2207 | H    | LEU | 232 | 2.365  | -13.990 | 2.237  | 1.00 | 0.19  |
| ATOM | 2208 | HA   | LEU | 232 | 0.907  | -15.932 | 3.824  | 1.00 | 0.08  |
| ATOM | 2209 | N    | ILE | 233 | -0.910 | -13.499 | 2.409  | 1.00 | -0.26 |
| ATOM | 2210 | CA   | ILE | 233 | -2.315 | -13.207 | 2.112  | 1.00 | 0.13  |
| ATOM | 2211 | C    | ILE | 233 | -2.883 | -14.304 | 1.238  | 1.00 | 0.20  |
| ATOM | 2212 | O    | ILE | 233 | -3.994 | -14.753 | 1.475  | 1.00 | -0.39 |
| ATOM | 2213 | CB   | ILE | 233 | -2.509 | -11.791 | 1.486  | 1.00 | 0.00  |

|      |      |      |     |     |        |         |        |      |       |
|------|------|------|-----|-----|--------|---------|--------|------|-------|
| ATOM | 2214 | CG1  | ILE | 233 | -2.286 | -10.689 | 2.572  | 1.00 | -0.05 |
| ATOM | 2215 | CG2  | ILE | 233 | -3.920 | -11.652 | 0.851  | 1.00 | -0.06 |
| ATOM | 2216 | CD1  | ILE | 233 | -2.005 | -9.285  | 1.970  | 1.00 | -0.06 |
| ATOM | 2217 | H    | ILE | 233 | -0.193 | -12.902 | 2.042  | 1.00 | 0.19  |
| ATOM | 2218 | HA   | ILE | 233 | -2.887 | -13.221 | 3.051  | 1.00 | 0.08  |
| ATOM | 2219 | HB   | ILE | 233 | -1.777 | -11.680 | 0.670  | 1.00 | 0.03  |
| ATOM | 2220 | HG12 | ILE | 233 | -1.431 | -10.955 | 3.212  | 1.00 | 0.03  |
| ATOM | 2221 | HG11 | ILE | 233 | -3.168 | -10.633 | 3.231  | 1.00 | 0.03  |
| ATOM | 2222 | HG23 | ILE | 233 | -4.059 | -12.377 | 0.034  | 1.00 | 0.02  |
| ATOM | 2223 | HG22 | ILE | 233 | -4.077 | -10.650 | 0.426  | 1.00 | 0.02  |
| ATOM | 2224 | HG21 | ILE | 233 | -4.682 | -11.831 | 1.623  | 1.00 | 0.02  |
| ATOM | 2225 | HD13 | ILE | 233 | -1.158 | -9.331  | 1.267  | 1.00 | 0.02  |
| ATOM | 2226 | HD12 | ILE | 233 | -1.746 | -8.576  | 2.772  | 1.00 | 0.02  |
| ATOM | 2227 | HD11 | ILE | 233 | -2.881 | -8.888  | 1.438  | 1.00 | 0.02  |
| ATOM | 2228 | N    | LEU | 234 | -2.153 | -14.781 | 0.211  | 1.00 | -0.26 |
| ATOM | 2229 | CA   | LEU | 234 | -2.671 | -15.909 | -0.560 | 1.00 | 0.13  |
| ATOM | 2230 | C    | LEU | 234 | -2.796 | -17.095 | 0.374  | 1.00 | 0.20  |
| ATOM | 2231 | O    | LEU | 234 | -3.783 | -17.813 | 0.310  | 1.00 | -0.39 |
| ATOM | 2232 | CB   | LEU | 234 | -1.781 | -16.255 | -1.784 | 1.00 | -0.01 |
| ATOM | 2233 | CG   | LEU | 234 | -1.637 | -15.103 | -2.829 | 1.00 | -0.04 |
| ATOM | 2234 | CD1  | LEU | 234 | -0.707 | -15.563 | -3.986 | 1.00 | -0.06 |
| ATOM | 2235 | CD2  | LEU | 234 | -3.005 | -14.634 | -3.401 | 1.00 | -0.06 |
| ATOM | 2236 | H    | LEU | 234 | -1.234 | -14.424 | 0.027  | 1.00 | 0.19  |
| ATOM | 2237 | HA   | LEU | 234 | -3.689 | -15.675 | -0.907 | 1.00 | 0.08  |
| ATOM | 2238 | HB2  | LEU | 234 | -2.210 | -17.139 | -2.284 | 1.00 | 0.03  |
| ATOM | 2239 | HB1  | LEU | 234 | -0.783 | -16.532 | -1.407 | 1.00 | 0.03  |
| ATOM | 2240 | HG   | LEU | 234 | -1.158 | -14.226 | -2.363 | 1.00 | 0.03  |
| ATOM | 2241 | HD13 | LEU | 234 | 0.276  | -15.867 | -3.593 | 1.00 | 0.02  |
| ATOM | 2242 | HD12 | LEU | 234 | -0.547 | -14.746 | -4.707 | 1.00 | 0.02  |
| ATOM | 2243 | HD11 | LEU | 234 | -1.152 | -16.417 | -4.520 | 1.00 | 0.02  |
| ATOM | 2244 | HD23 | LEU | 234 | -3.582 | -15.493 | -3.775 | 1.00 | 0.02  |
| ATOM | 2245 | HD22 | LEU | 234 | -2.853 | -13.929 | -4.232 | 1.00 | 0.02  |
| ATOM | 2246 | HD21 | LEU | 234 | -3.598 | -14.109 | -2.636 | 1.00 | 0.02  |
| ATOM | 2247 | N    | GLY | 235 | -1.824 | -17.320 | 1.284  | 1.00 | -0.27 |
| ATOM | 2248 | CA   | GLY | 235 | -2.018 | -18.355 | 2.296  | 1.00 | 0.12  |
| ATOM | 2249 | C    | GLY | 235 | -3.283 | -18.094 | 3.080  | 1.00 | 0.20  |
| ATOM | 2250 | O    | GLY | 235 | -4.061 | -19.014 | 3.274  | 1.00 | -0.39 |
| ATOM | 2251 | H    | GLY | 235 | -0.984 | -16.765 | 1.315  | 1.00 | 0.19  |
| ATOM | 2252 | HA1  | GLY | 235 | -2.081 | -19.340 | 1.807  | 1.00 | 0.08  |
| ATOM | 2253 | HA2  | GLY | 235 | -1.181 | -18.377 | 3.011  | 1.00 | 0.08  |
| ATOM | 2254 | N    | CYS | 236 | -3.518 | -16.847 | 3.542  | 1.00 | -0.26 |
| ATOM | 2255 | CA   | CYS | 236 | -4.756 | -16.535 | 4.253  | 1.00 | 0.14  |
| ATOM | 2256 | C    | CYS | 236 | -5.927 | -16.896 | 3.374  | 1.00 | 0.20  |
| ATOM | 2257 | O    | CYS | 236 | -6.868 | -17.500 | 3.861  | 1.00 | -0.39 |
| ATOM | 2258 | CB   | CYS | 236 | -4.863 | -15.030 | 4.619  | 1.00 | 0.03  |
| ATOM | 2259 | SG   | CYS | 236 | -6.434 | -14.681 | 5.476  | 1.00 | -0.17 |
| ATOM | 2260 | H    | CYS | 236 | -2.857 | -16.116 | 3.373  | 1.00 | 0.19  |
| ATOM | 2261 | HA   | CYS | 236 | -4.797 | -17.128 | 5.181  | 1.00 | 0.08  |
| ATOM | 2262 | HB2  | CYS | 236 | -4.863 | -14.416 | 3.710  | 1.00 | 0.04  |
| ATOM | 2263 | HB1  | CYS | 236 | -4.013 | -14.732 | 5.253  | 1.00 | 0.04  |
| ATOM | 2264 | LPG2 | CYS | 236 | -5.753 | -16.216 | 6.556  | 1.00 | 0.00  |
| ATOM | 2265 | LPG1 | CYS | 236 | -6.459 | -15.788 | 5.815  | 1.00 | 0.00  |
| ATOM | 2266 | HG   | CYS | 236 | -6.337 | -13.681 | 5.562  | 1.00 | 0.10  |
| ATOM | 2267 | N    | TYR | 237 | -5.899 | -16.553 | 2.070  | 1.00 | -0.26 |
| ATOM | 2268 | CA   | TYR | 237 | -7.000 | -16.968 | 1.204  | 1.00 | 0.14  |
| ATOM | 2269 | C    | TYR | 237 | -7.104 | -18.478 | 1.228  | 1.00 | 0.21  |
| ATOM | 2270 | O    | TYR | 237 | -8.198 | -19.008 | 1.351  | 1.00 | -0.39 |
| ATOM | 2271 | CB   | TYR | 237 | -6.833 | -16.456 | -0.252 | 1.00 | 0.02  |
