# Supplementary material
Source: PubMed Central journal article supplement (PMC3469197)
Supplement: NIHMS410020-supplement-supporting_information_file2.pdf [file NIHMS410020-supplement-supporting_information_file2.pdf]

|      |      |      |     |     |         |         |        |      |       |
|------|------|------|-----|-----|---------|---------|--------|------|-------|
| ATOM | 2272 | CG   | TYR | 237 | -6.746  | -14.925 | -0.413 | 1.00 | -0.05 |
| ATOM | 2273 | CD1  | TYR | 237 | -6.955  | -14.018 | 0.635  | 1.00 | -0.07 |
| ATOM | 2274 | CD2  | TYR | 237 | -6.451  | -14.418 | -1.684 | 1.00 | -0.07 |
| ATOM | 2275 | CE1  | TYR | 237 | -6.949  | -12.641 | 0.399  | 1.00 | -0.04 |
| ATOM | 2276 | CE2  | TYR | 237 | -6.402  | -13.040 | -1.911 | 1.00 | -0.04 |
| ATOM | 2277 | CZ   | TYR | 237 | -6.665  | -12.141 | -0.876 | 1.00 | 0.08  |
| ATOM | 2278 | OH   | TYR | 237 | -6.633  | -10.767 | -1.131 | 1.00 | -0.34 |
| ATOM | 2279 | H    | TYR | 237 | -5.119  | -16.052 | 1.678  | 1.00 | 0.19  |
| ATOM | 2280 | HA   | TYR | 237 | -7.946  | -16.582 | 1.609  | 1.00 | 0.08  |
| ATOM | 2281 | HB1  | TYR | 237 | -7.692  | -16.804 | -0.847 | 1.00 | 0.05  |
| ATOM | 2282 | HB2  | TYR | 237 | -5.926  | -16.903 | -0.681 | 1.00 | 0.05  |
| ATOM | 2283 | HD1  | TYR | 237 | -7.129  | -14.355 | 1.649  | 1.00 | 0.05  |
| ATOM | 2284 | HD2  | TYR | 237 | -6.259  | -15.098 | -2.508 | 1.00 | 0.05  |
| ATOM | 2285 | HE1  | TYR | 237 | -7.165  | -11.961 | 1.216  | 1.00 | 0.05  |
| ATOM | 2286 | HE2  | TYR | 237 | -6.159  | -12.659 | -2.895 | 1.00 | 0.05  |
| ATOM | 2287 | HH   | TYR | 237 | -6.667  | -10.230 | -0.348 | 1.00 | 0.25  |
| ATOM | 2288 | N    | GLY | 238 | -5.969  | -19.202 | 1.130  | 1.00 | -0.27 |
| ATOM | 2289 | CA   | GLY | 238 | -6.035  | -20.656 | 1.252  | 1.00 | 0.12  |
| ATOM | 2290 | C    | GLY | 238 | -6.620  | -21.071 | 2.582  | 1.00 | 0.20  |
| ATOM | 2291 | O    | GLY | 238 | -7.436  | -21.979 | 2.616  | 1.00 | -0.39 |
| ATOM | 2292 | H    | GLY | 238 | -5.072  | -18.757 | 1.012  | 1.00 | 0.19  |
| ATOM | 2293 | HA1  | GLY | 238 | -6.655  | -21.062 | 0.437  | 1.00 | 0.08  |
| ATOM | 2294 | HA2  | GLY | 238 | -5.033  | -21.105 | 1.179  | 1.00 | 0.08  |
| ATOM | 2295 | N    | LEU | 239 | -6.221  | -20.435 | 3.705  | 1.00 | -0.26 |
| ATOM | 2296 | CA   | LEU | 239 | -6.816  | -20.796 | 4.989  | 1.00 | 0.13  |
| ATOM | 2297 | C    | LEU | 239 | -8.291  | -20.465 | 4.973  | 1.00 | 0.20  |
| ATOM | 2298 | O    | LEU | 239 | -9.080  | -21.263 | 5.449  | 1.00 | -0.39 |
| ATOM | 2299 | CB   | LEU | 239 | -6.203  | -20.071 | 6.221  | 1.00 | -0.01 |
| ATOM | 2300 | CG   | LEU | 239 | -4.679  | -20.304 | 6.452  | 1.00 | -0.04 |
| ATOM | 2301 | CD1  | LEU | 239 | -4.256  | -19.635 | 7.791  | 1.00 | -0.06 |
| ATOM | 2302 | CD2  | LEU | 239 | -4.295  | -21.810 | 6.469  | 1.00 | -0.06 |
| ATOM | 2303 | H    | LEU | 239 | -5.551  | -19.688 | 3.659  | 1.00 | 0.19  |
| ATOM | 2304 | HA   | LEU | 239 | -6.728  | -21.882 | 5.135  | 1.00 | 0.08  |
| ATOM | 2305 | HB2  | LEU | 239 | -6.745  | -20.416 | 7.117  | 1.00 | 0.03  |
| ATOM | 2306 | HB1  | LEU | 239 | -6.385  | -18.989 | 6.115  | 1.00 | 0.03  |
| ATOM | 2307 | HG   | LEU | 239 | -4.106  | -19.817 | 5.647  | 1.00 | 0.03  |
| ATOM | 2308 | HD13 | LEU | 239 | -4.561  | -18.578 | 7.804  | 1.00 | 0.02  |
| ATOM | 2309 | HD12 | LEU | 239 | -3.164  | -19.683 | 7.923  | 1.00 | 0.02  |
| ATOM | 2310 | HD11 | LEU | 239 | -4.733  | -20.142 | 8.644  | 1.00 | 0.02  |
| ATOM | 2311 | HD23 | LEU | 239 | -4.921  | -22.358 | 7.189  | 1.00 | 0.02  |
| ATOM | 2312 | HD22 | LEU | 239 | -3.240  | -21.931 | 6.759  | 1.00 | 0.02  |
| ATOM | 2313 | HD21 | LEU | 239 | -4.417  | -22.260 | 5.472  | 1.00 | 0.02  |
| ATOM | 2314 | N    | ILE | 240 | -8.695  | -19.293 | 4.443  | 1.00 | -0.26 |
| ATOM | 2315 | CA   | ILE | 240 | -10.115 | -18.946 | 4.429  | 1.00 | 0.13  |
| ATOM | 2316 | C    | ILE | 240 | -10.860 | -19.964 | 3.601  | 1.00 | 0.20  |
| ATOM | 2317 | O    | ILE | 240 | -11.881 | -20.460 | 4.048  | 1.00 | -0.39 |
| ATOM | 2318 | CB   | ILE | 240 | -10.357 | -17.510 | 3.872  | 1.00 | 0.00  |
| ATOM | 2319 | CG1  | ILE | 240 | -9.820  | -16.445 | 4.880  | 1.00 | -0.05 |
| ATOM | 2320 | CG2  | ILE | 240 | -11.865 | -17.291 | 3.550  | 1.00 | -0.06 |
| ATOM | 2321 | CD1  | ILE | 240 | -9.518  | -15.075 | 4.214  | 1.00 | -0.06 |
| ATOM | 2322 | H    | ILE | 240 | -8.027  | -18.668 | 4.031  | 1.00 | 0.19  |
| ATOM | 2323 | HA   | ILE | 240 | -10.511 | -18.996 | 5.457  | 1.00 | 0.08  |
| ATOM | 2324 | HB   | ILE | 240 | -9.805  | -17.419 | 2.923  | 1.00 | 0.03  |
| ATOM | 2325 | HG12 | ILE | 240 | -8.882  | -16.786 | 5.346  | 1.00 | 0.03  |
| ATOM | 2326 | HG11 | ILE | 240 | -10.550 | -16.320 | 5.694  | 1.00 | 0.03  |
| ATOM | 2327 | HG23 | ILE | 240 | -12.196 | -17.946 | 2.729  | 1.00 | 0.02  |
| ATOM | 2328 | HG22 | ILE | 240 | -12.069 | -16.259 | 3.236  | 1.00 | 0.02  |
| ATOM | 2329 | HG21 | ILE | 240 | -12.478 | -17.514 | 4.437  | 1.00 | 0.02  |

|      |      |         |     |         |         |        |      |       |
|------|------|---------|-----|---------|---------|--------|------|-------|
| ATOM | 2330 | HD13ILE | 240 | -8.654  | -15.165 | 3.541  | 1.00 | 0.02  |
| ATOM | 2331 | HD12ILE | 240 | -9.283  | -14.322 | 4.983  | 1.00 | 0.02  |
| ATOM | 2332 | HD11ILE | 240 | -10.364 | -14.705 | 3.625  | 1.00 | 0.02  |
| ATOM | 2333 | N VAL   | 241 | -10.383 | -20.296 | 2.384  | 1.00 | -0.26 |
| ATOM | 2334 | CA VAL  | 241 | -11.096 | -21.302 | 1.595  | 1.00 | 0.13  |
| ATOM | 2335 | C VAL   | 241 | -11.044 | -22.629 | 2.326  | 1.00 | 0.20  |
| ATOM | 2336 | O VAL   | 241 | -12.043 | -23.328 | 2.390  | 1.00 | -0.39 |
| ATOM | 2337 | CB VAL  | 241 | -10.517 | -21.417 | 0.153  | 1.00 | -0.01 |
| ATOM | 2338 | CG1 VAL | 241 | -11.126 | -22.628 | -0.609 | 1.00 | -0.06 |
| ATOM | 2339 | CG2 VAL | 241 | -10.784 | -20.110 | -0.650 | 1.00 | -0.06 |
| ATOM | 2340 | H VAL   | 241 | -9.526  | -19.895 | 2.041  | 1.00 | 0.19  |
| ATOM | 2341 | HA VAL  | 241 | -12.158 | -21.015 | 1.518  | 1.00 | 0.08  |
| ATOM | 2342 | HB VAL  | 241 | -9.427  | -21.575 | 0.226  | 1.00 | 0.03  |
| ATOM | 2343 | HG13VAL | 241 | -10.865 | -23.578 | -0.119 | 1.00 | 0.02  |
| ATOM | 2344 | HG12VAL | 241 | -10.742 | -22.665 | -1.640 | 1.00 | 0.02  |
| ATOM | 2345 | HG11VAL | 241 | -12.223 | -22.543 | -0.647 | 1.00 | 0.02  |
| ATOM | 2346 | HG23VAL | 241 | -11.866 | -19.955 | -0.784 | 1.00 | 0.02  |
| ATOM | 2347 | HG22VAL | 241 | -10.318 | -20.172 | -1.645 | 1.00 | 0.02  |
| ATOM | 2348 | HG21VAL | 241 | -10.373 | -19.227 | -0.138 | 1.00 | 0.02  |
| ATOM | 2349 | N ARG   | 242 | -9.884  | -23.018 | 2.895  | 1.00 | -0.26 |
| ATOM | 2350 | CA ARG  | 242 | -9.826  | -24.290 | 3.616  | 1.00 | 0.13  |
| ATOM | 2351 | C ARG   | 242 | -10.654 | -24.247 | 4.888  | 1.00 | 0.20  |
| ATOM | 2352 | O ARG   | 242 | -11.116 | -25.299 | 5.306  | 1.00 | -0.39 |
| ATOM | 2353 | CB ARG  | 242 | -8.346  | -24.661 | 3.914  | 1.00 | -0.01 |
| ATOM | 2354 | CG ARG  | 242 | -8.155  | -26.114 | 4.433  | 1.00 | -0.02 |
| ATOM | 2355 | CD ARG  | 242 | -6.644  | -26.467 | 4.567  | 1.00 | 0.06  |
| ATOM | 2356 | NE ARG  | 242 | -6.426  | -27.860 | 4.978  | 1.00 | -0.27 |
| ATOM | 2357 | CZ ARG  | 242 | -5.237  | -28.406 | 5.119  | 1.00 | 0.29  |
| ATOM | 2358 | NH1 ARG | 242 | -4.125  | -27.741 | 4.920  | 1.00 | -0.28 |
| ATOM | 2359 | NH2 ARG | 242 | -5.153  | -29.666 | 5.472  | 1.00 | -0.28 |
| ATOM | 2360 | HB2 ARG | 242 | -7.780  | -24.554 | 2.974  | 1.00 | 0.03  |
| ATOM | 2361 | HB1 ARG | 242 | -7.942  | -23.948 | 4.648  | 1.00 | 0.03  |
| ATOM | 2362 | HG2 ARG | 242 | -8.621  | -26.817 | 3.723  | 1.00 | 0.03  |
| ATOM | 2363 | HG1 ARG | 242 | -8.646  | -26.230 | 5.412  | 1.00 | 0.03  |
| ATOM | 2364 | HD2 ARG | 242 | -6.201  | -25.776 | 5.305  | 1.00 | 0.07  |
| ATOM | 2365 | HD1 ARG | 242 | -6.176  | -26.302 | 3.581  | 1.00 | 0.07  |
| ATOM | 2366 | HE ARG  | 242 | -7.264  | -28.436 | 5.151  | 1.00 | 0.26  |
| ATOM | 2367 | HH21ARG | 242 | -5.995  | -30.235 | 5.639  | 1.00 | 0.26  |
| ATOM | 2368 | HH22ARG | 242 | -4.240  | -30.129 | 5.591  | 1.00 | 0.26  |
| ATOM | 2369 | HH11ARG | 242 | -4.128  | -26.753 | 4.646  | 1.00 | 0.26  |
| ATOM | 2370 | HH12ARG | 242 | -3.206  | -28.193 | 5.034  | 1.00 | 0.26  |
| ATOM | 2371 | H ARG   | 242 | -9.066  | -22.433 | 2.850  | 1.00 | 0.19  |
| ATOM | 2372 | HA ARG  | 242 | -10.250 | -25.070 | 2.962  | 1.00 | 0.08  |
| ATOM | 2373 | N ALA   | 243 | -10.857 | -23.064 | 5.516  | 1.00 | -0.26 |
| ATOM | 2374 | CA ALA  | 243 | -11.673 | -22.940 | 6.726  | 1.00 | 0.13  |
| ATOM | 2375 | C ALA   | 243 | -12.824 | -21.990 | 6.490  | 1.00 | 0.25  |
| ATOM | 2376 | O ALA   | 243 | -13.070 | -21.081 | 7.269  | 1.00 | -0.33 |
| ATOM | 2377 | CB ALA  | 243 | -10.779 | -22.484 | 7.909  | 1.00 | -0.03 |
| ATOM | 2378 | H ALA   | 243 | -10.447 | -22.217 | 5.166  | 1.00 | 0.19  |
| ATOM | 2379 | HA ALA  | 243 | -12.154 | -23.884 | 7.008  | 1.00 | 0.08  |
| ATOM | 2380 | HB3 ALA | 243 | -10.365 | -21.484 | 7.710  | 1.00 | 0.03  |
| ATOM | 2381 | HB2 ALA | 243 | -9.946  | -23.192 | 8.039  | 1.00 | 0.03  |
| ATOM | 2382 | HB1 ALA | 243 | -11.359 | -22.442 | 8.844  | 1.00 | 0.03  |
| TER  | 2383 | ALA     | 243 |         |         |        |      |       |
| ATOM | 2384 | C ACE   | 259 | -18.321 | -16.785 | -0.553 | 1.00 | 0.18  |
| ATOM | 2385 | O ACE   | 259 | -17.379 | -16.012 | -0.607 | 1.00 | -0.40 |
| ATOM | 2386 | CH3 ACE | 259 | -18.596 | -17.516 | 0.734  | 1.00 | 0.03  |
| ATOM | 2387 | H ACE   | 259 | -18.544 | -18.601 | 0.559  | 1.00 | 0.05  |

|      |      |         |     |         |         |         |        |      |       |
|------|------|---------|-----|---------|---------|---------|--------|------|-------|
| ATOM | 2388 | H       | ACE | 259     | -19.599 | -17.254 | 1.099  | 1.00 | 0.05  |
| ATOM | 2389 | H       | ACE | 259     | -17.855 | -17.245 | 1.501  | 1.00 | 0.05  |
| ATOM | 2390 | N       | TYR | 260     | -19.129 | -17.002 | -1.613 | 1.00 | -0.26 |
| ATOM | 2391 | CA      | TYR | 260     | -18.840 | -16.344 | -2.889 | 1.00 | 0.14  |
| ATOM | 2392 | C       | TYR | 260     | -18.599 | -14.860 | -2.716 | 1.00 | 0.21  |
| ATOM | 2393 | O       | TYR | 260     | -17.667 | -14.340 | -3.306 | 1.00 | -0.39 |
| ATOM | 2394 | CB      | TYR | 260     | -19.974 | -16.538 | -3.929 | 1.00 | 0.02  |
| ATOM | 2395 | CG      | TYR | 260     | -20.142 | -18.030 | -4.249 | 1.00 | -0.05 |
| ATOM | 2396 | CD1     | TYR | 260     | -19.179 | -18.687 | -5.025 | 1.00 | -0.07 |
| ATOM | 2397 | CD2     | TYR | 260     | -21.244 | -18.751 | -3.774 | 1.00 | -0.07 |
| ATOM | 2398 | CE1     | TYR | 260     | -19.296 | -20.053 | -5.295 | 1.00 | -0.04 |
| ATOM | 2399 | CE2     | TYR | 260     | -21.362 | -20.116 | -4.048 | 1.00 | -0.04 |
| ATOM | 2400 | CZ      | TYR | 260     | -20.389 | -20.777 | -4.802 | 1.00 | 0.08  |
| ATOM | 2401 | OH      | TYR | 260     | -20.530 | -22.146 | -5.048 | 1.00 | -0.34 |
| ATOM | 2402 | H       | TYR | 260     | -19.894 | -17.644 | -1.550 | 1.00 | 0.19  |
| ATOM | 2403 | HA      | TYR | 260     | -17.920 | -16.792 | -3.292 | 1.00 | 0.08  |
| ATOM | 2404 | HB1     | TYR | 260     | -19.724 | -16.006 | -4.861 | 1.00 | 0.05  |
| ATOM | 2405 | HB2     | TYR | 260     | -20.909 | -16.107 | -3.538 | 1.00 | 0.05  |
| ATOM | 2406 | HD1     | TYR | 260     | -18.333 | -18.136 | -5.424 | 1.00 | 0.05  |
| ATOM | 2407 | HD2     | TYR | 260     | -22.014 | -18.257 | -3.190 | 1.00 | 0.05  |
| ATOM | 2408 | HE1     | TYR | 260     | -18.532 | -20.545 | -5.888 | 1.00 | 0.05  |
| ATOM | 2409 | HE2     | TYR | 260     | -22.214 | -20.674 | -3.673 | 1.00 | 0.05  |
| ATOM | 2410 | HH      | TYR | 260     | -19.840 | -22.522 | -5.582 | 1.00 | 0.25  |
| ATOM | 2411 | N       | LEU | 261     | -19.411 | -14.144 | -1.912 | 1.00 | -0.26 |
| ATOM | 2412 | CA      | LEU | 261     | -19.157 | -12.714 | -1.725 | 1.00 | 0.13  |
| ATOM | 2413 | C       | LEU | 261     | -17.779 | -12.509 | -1.127 | 1.00 | 0.20  |
| ATOM | 2414 | O       | LEU | 261     | -17.069 | -11.595 | -1.517 | 1.00 | -0.39 |
| ATOM | 2415 | CB      | LEU | 261     | -20.188 | -12.028 | -0.785 | 1.00 | -0.01 |
| ATOM | 2416 | CG      | LEU | 261     | -21.685 | -12.168 | -1.203 | 1.00 | -0.04 |
| ATOM | 2417 | CD1     | LEU | 261     | -22.580 | -11.382 | -0.204 | 1.00 | -0.06 |
| ATOM | 2418 | CD2     | LEU | 261     | -21.936 | -11.682 | -2.658 | 1.00 | -0.06 |
| ATOM | 2419 | H       | LEU | 261     | -20.146 | -14.596 | -1.410 | 1.00 | 0.19  |
| ATOM | 2420 | HA      | LEU | 261     | -19.165 | -12.213 | -2.705 | 1.00 | 0.08  |
| ATOM | 2421 | HB2     | LEU | 261     | -19.930 | -10.958 | -0.748 | 1.00 | 0.03  |
| ATOM | 2422 | HB1     | LEU | 261     | -20.066 | -12.443 | 0.229  | 1.00 | 0.03  |
| ATOM | 2423 | HG      | LEU | 261     | -22.004 | -13.222 | -1.142 | 1.00 | 0.03  |
| ATOM | 2424 | HD13LEU | 261 | -22.445 | -11.760 | 0.822   | 1.00   | 0.02 |       |
| ATOM | 2425 | HD12LEU | 261 | -23.642 | -11.482 | -0.470  | 1.00   | 0.02 |       |
| ATOM | 2426 | HD11LEU | 261 | -22.324 | -10.314 | -0.213  | 1.00   | 0.02 |       |
| ATOM | 2427 | HD23LEU | 261 | -21.541 | -10.666 | -2.800  | 1.00   | 0.02 |       |
| ATOM | 2428 | HD22LEU | 261 | -23.014 | -11.672 | -2.881  | 1.00   | 0.02 |       |
| ATOM | 2429 | HD21LEU | 261 | -21.454 | -12.354 | -3.384  | 1.00   | 0.02 |       |
| ATOM | 2430 | N       | VAL | 262     | -17.367 | -13.360 | -0.166 | 1.00 | -0.26 |
| ATOM | 2431 | CA      | VAL | 262     | -16.029 | -13.212 | 0.400  | 1.00 | 0.13  |
| ATOM | 2432 | C       | VAL | 262     | -15.036 | -13.524 | -0.694 | 1.00 | 0.20  |
| ATOM | 2433 | O       | VAL | 262     | -14.105 | -12.758 | -0.882 | 1.00 | -0.39 |
| ATOM | 2434 | CB      | VAL | 262     | -15.824 | -14.134 | 1.639  | 1.00 | -0.01 |
| ATOM | 2435 | CG1     | VAL | 262     | -14.352 | -14.118 | 2.131  | 1.00 | -0.06 |
| ATOM | 2436 | CG2     | VAL | 262     | -16.777 | -13.710 | 2.792  | 1.00 | -0.06 |
| ATOM | 2437 | H       | VAL | 262     | -17.921 | -14.152 | 0.093  | 1.00 | 0.19  |
| ATOM | 2438 | HA      | VAL | 262     | -15.876 | -12.167 | 0.716  | 1.00 | 0.08  |
| ATOM | 2439 | HB      | VAL | 262     | -16.057 | -15.174 | 1.357  | 1.00 | 0.03  |
| ATOM | 2440 | HG13VAL | 262 | -13.669 | -14.479 | 1.350   | 1.00   | 0.02 |       |
| ATOM | 2441 | HG12VAL | 262 | -14.249 | -14.792 | 2.993   | 1.00   | 0.02 |       |
| ATOM | 2442 | HG11VAL | 262 | -14.050 | -13.101 | 2.427   | 1.00   | 0.02 |       |
| ATOM | 2443 | HG23VAL | 262 | -16.533 | -12.690 | 3.127   | 1.00   | 0.02 |       |
| ATOM | 2444 | HG22VAL | 262 | -16.678 | -14.395 | 3.647   | 1.00   | 0.02 |       |
| ATOM | 2445 | HG21VAL | 262 | -17.829 | -13.724 | 2.471   | 1.00   | 0.02 |       |

|      |      |      |     |     |         |         |        |      |       |
|------|------|------|-----|-----|---------|---------|--------|------|-------|
| ATOM | 2446 | N    | ILE | 263 | -15.214 | -14.633 | -1.445 | 1.00 | -0.26 |
| ATOM | 2447 | CA   | ILE | 263 | -14.275 | -14.923 | -2.530 | 1.00 | 0.13  |
| ATOM | 2448 | C    | ILE | 263 | -14.236 | -13.725 | -3.451 | 1.00 | 0.20  |
| ATOM | 2449 | O    | ILE | 263 | -13.154 | -13.351 | -3.873 | 1.00 | -0.39 |
| ATOM | 2450 | CB   | ILE | 263 | -14.605 | -16.231 | -3.313 | 1.00 | 0.00  |
| ATOM | 2451 | CG1  | ILE | 263 | -14.450 | -17.474 | -2.378 | 1.00 | -0.05 |
| ATOM | 2452 | CG2  | ILE | 263 | -13.703 | -16.360 | -4.577 | 1.00 | -0.06 |
| ATOM | 2453 | CD1  | ILE | 263 | -14.978 | -18.799 | -2.994 | 1.00 | -0.06 |
| ATOM | 2454 | H    | ILE | 263 | -16.018 | -15.217 | -1.301 | 1.00 | 0.19  |
| ATOM | 2455 | HA   | ILE | 263 | -13.268 | -15.042 | -2.102 | 1.00 | 0.08  |
| ATOM | 2456 | HB   | ILE | 263 | -15.647 | -16.153 | -3.657 | 1.00 | 0.03  |
| ATOM | 2457 | HG12 | ILE | 263 | -15.014 | -17.315 | -1.446 | 1.00 | 0.03  |
| ATOM | 2458 | HG11 | ILE | 263 | -13.390 | -17.602 | -2.104 | 1.00 | 0.03  |
| ATOM | 2459 | HG23 | ILE | 263 | -13.842 | -15.505 | -5.255 | 1.00 | 0.02  |
| ATOM | 2460 | HG22 | ILE | 263 | -13.947 | -17.261 | -5.155 | 1.00 | 0.02  |
| ATOM | 2461 | HG21 | ILE | 263 | -12.642 | -16.404 | -4.286 | 1.00 | 0.02  |
| ATOM | 2462 | HD13 | ILE | 263 | -16.013 | -18.675 | -3.347 | 1.00 | 0.02  |
| ATOM | 2463 | HD12 | ILE | 263 | -14.965 | -19.595 | -2.232 | 1.00 | 0.02  |
| ATOM | 2464 | HD11 | ILE | 263 | -14.353 | -19.137 | -3.833 | 1.00 | 0.02  |
| ATOM | 2465 | N    | ILE | 264 | -15.384 | -13.089 | -3.773 | 1.00 | -0.26 |
| ATOM | 2466 | CA   | ILE | 264 | -15.325 | -11.881 | -4.593 | 1.00 | 0.13  |
| ATOM | 2467 | C    | ILE | 264 | -14.456 | -10.868 | -3.881 | 1.00 | 0.20  |
| ATOM | 2468 | O    | ILE | 264 | -13.577 | -10.321 | -4.526 | 1.00 | -0.39 |
| ATOM | 2469 | CB   | ILE | 264 | -16.725 | -11.302 | -4.968 | 1.00 | 0.00  |
| ATOM | 2470 | CG1  | ILE | 264 | -17.462 | -12.272 | -5.946 | 1.00 | -0.05 |
| ATOM | 2471 | CG2  | ILE | 264 | -16.586 | -9.885  | -5.596 | 1.00 | -0.06 |
| ATOM | 2472 | CD1  | ILE | 264 | -18.963 | -11.934 | -6.163 | 1.00 | -0.06 |
| ATOM | 2473 | H    | ILE | 264 | -16.267 | -13.404 | -3.414 | 1.00 | 0.19  |
| ATOM | 2474 | HA   | ILE | 264 | -14.818 | -12.136 | -5.538 | 1.00 | 0.08  |
| ATOM | 2475 | HB   | ILE | 264 | -17.308 | -11.196 | -4.040 | 1.00 | 0.03  |
| ATOM | 2476 | HG12 | ILE | 264 | -17.414 | -13.299 | -5.555 | 1.00 | 0.03  |
| ATOM | 2477 | HG11 | ILE | 264 | -16.951 | -12.272 | -6.923 | 1.00 | 0.03  |
| ATOM | 2478 | HG23 | ILE | 264 | -16.115 | -9.179  | -4.895 | 1.00 | 0.02  |
| ATOM | 2479 | HG22 | ILE | 264 | -17.566 | -9.468  | -5.858 | 1.00 | 0.02  |
| ATOM | 2480 | HG21 | ILE | 264 | -15.977 | -9.936  | -6.511 | 1.00 | 0.02  |
| ATOM | 2481 | HD13 | ILE | 264 | -19.483 | -11.846 | -5.198 | 1.00 | 0.02  |
| ATOM | 2482 | HD12 | ILE | 264 | -19.445 | -12.737 | -6.743 | 1.00 | 0.02  |
| ATOM | 2483 | HD11 | ILE | 264 | -19.095 | -10.996 | -6.721 | 1.00 | 0.02  |
| ATOM | 2484 | N    | VAL | 265 | -14.641 | -10.592 | -2.571 | 1.00 | -0.26 |
| ATOM | 2485 | CA   | VAL | 265 | -13.732 | -9.645  | -1.912 | 1.00 | 0.13  |
| ATOM | 2486 | C    | VAL | 265 | -12.301 | -10.097 | -2.103 | 1.00 | 0.20  |
| ATOM | 2487 | O    | VAL | 265 | -11.447 | -9.278  | -2.406 | 1.00 | -0.39 |
| ATOM | 2488 | CB   | VAL | 265 | -13.968 | -9.458  | -0.380 | 1.00 | -0.01 |
| ATOM | 2489 | CG1  | VAL | 265 | -12.851 | -8.591  | 0.271  | 1.00 | -0.06 |
| ATOM | 2490 | CG2  | VAL | 265 | -15.334 | -8.773  | -0.123 | 1.00 | -0.06 |
| ATOM | 2491 | H    | VAL | 265 | -15.366 | -11.054 | -2.049 | 1.00 | 0.19  |
| ATOM | 2492 | HA   | VAL | 265 | -13.850 | -8.663  | -2.400 | 1.00 | 0.08  |
| ATOM | 2493 | HB   | VAL | 265 | -13.963 | -10.443 | 0.114  | 1.00 | 0.03  |
| ATOM | 2494 | HG13 | VAL | 265 | -11.871 | -9.090  | 0.240  | 1.00 | 0.02  |
| ATOM | 2495 | HG12 | VAL | 265 | -13.081 | -8.376  | 1.325  | 1.00 | 0.02  |
| ATOM | 2496 | HG11 | VAL | 265 | -12.777 | -7.636  | -0.267 | 1.00 | 0.02  |
| ATOM | 2497 | HG23 | VAL | 265 | -15.333 | -7.775  | -0.589 | 1.00 | 0.02  |
| ATOM | 2498 | HG22 | VAL | 265 | -15.524 | -8.656  | 0.955  | 1.00 | 0.02  |
| ATOM | 2499 | HG21 | VAL | 265 | -16.152 | -9.369  | -0.550 | 1.00 | 0.02  |
| ATOM | 2500 | N    | LEU | 266 | -11.996 | -11.398 | -1.915 | 1.00 | -0.26 |
| ATOM | 2501 | CA   | LEU | 266 | -10.604 | -11.831 | -2.046 | 1.00 | 0.13  |
| ATOM | 2502 | C    | LEU | 266 | -10.141 | -11.599 | -3.470 | 1.00 | 0.20  |
| ATOM | 2503 | O    | LEU | 266 | -9.058  | -11.075 | -3.686 | 1.00 | -0.39 |

|      |      |      |     |     |         |         |        |      |       |
|------|------|------|-----|-----|---------|---------|--------|------|-------|
| ATOM | 2504 | CB   | LEU | 266 | -10.363 | -13.316 | -1.643 | 1.00 | -0.01 |
| ATOM | 2505 | CG   | LEU | 266 | -10.964 | -13.742 | -0.267 | 1.00 | -0.04 |
| ATOM | 2506 | CD1  | LEU | 266 | -10.478 | -15.164 | 0.121  | 1.00 | -0.06 |
| ATOM | 2507 | CD2  | LEU | 266 | -10.682 | -12.729 | 0.876  | 1.00 | -0.06 |
| ATOM | 2508 | H    | LEU | 266 | -12.723 | -12.060 | -1.713 | 1.00 | 0.19  |
| ATOM | 2509 | HA   | LEU | 266 | -9.981  | -11.199 | -1.392 | 1.00 | 0.08  |
| ATOM | 2510 | HB2  | LEU | 266 | -9.275  | -13.486 | -1.630 | 1.00 | 0.03  |
| ATOM | 2511 | HB1  | LEU | 266 | -10.792 | -13.966 | -2.423 | 1.00 | 0.03  |
| ATOM | 2512 | HG   | LEU | 266 | -12.052 | -13.829 | -0.358 | 1.00 | 0.03  |
| ATOM | 2513 | HD13 | LEU | 266 | -10.697 | -15.887 | -0.680 | 1.00 | 0.02  |
| ATOM | 2514 | HD12 | LEU | 266 | -10.966 | -15.511 | 1.044  | 1.00 | 0.02  |
| ATOM | 2515 | HD11 | LEU | 266 | -9.396  | -15.145 | 0.290  | 1.00 | 0.02  |
| ATOM | 2516 | HD23 | LEU | 266 | -9.601  | -12.588 | 1.003  | 1.00 | 0.02  |
| ATOM | 2517 | HD22 | LEU | 266 | -11.149 | -11.754 | 0.670  | 1.00 | 0.02  |
| ATOM | 2518 | HD21 | LEU | 266 | -11.101 | -13.096 | 1.826  | 1.00 | 0.02  |
| ATOM | 2519 | N    | THR | 267 | -10.955 | -11.980 | -4.477 | 1.00 | -0.26 |
| ATOM | 2520 | CA   | THR | 267 | -10.566 | -11.733 | -5.864 | 1.00 | 0.16  |
| ATOM | 2521 | C    | THR | 267 | -10.448 | -10.250 | -6.126 | 1.00 | 0.21  |
| ATOM | 2522 | O    | THR | 267 | -9.514  | -9.840  | -6.793 | 1.00 | -0.39 |
| ATOM | 2523 | CB   | THR | 267 | -11.590 | -12.339 | -6.862 | 1.00 | 0.09  |
| ATOM | 2524 | OG1  | THR | 267 | -11.659 | -13.755 | -6.610 | 1.00 | -0.39 |
| ATOM | 2525 | CG2  | THR | 267 | -11.177 | -12.089 | -8.338 | 1.00 | -0.03 |
| ATOM | 2526 | H    | THR | 267 | -11.842 | -12.415 | -4.293 | 1.00 | 0.19  |
| ATOM | 2527 | HA   | THR | 267 | -9.593  | -12.216 | -6.045 | 1.00 | 0.08  |
| ATOM | 2528 | HB   | THR | 267 | -12.573 | -11.872 | -6.674 | 1.00 | 0.06  |
| ATOM | 2529 | HG1  | THR | 267 | -12.314 | -14.200 | -7.138 | 1.00 | 0.21  |
| ATOM | 2530 | HG22 | THR | 267 | -11.901 | -12.564 | -9.018 | 1.00 | 0.03  |
| ATOM | 2531 | HG21 | THR | 267 | -10.183 | -12.520 | -8.530 | 1.00 | 0.03  |
| ATOM | 2532 | HG23 | THR | 267 | -11.148 | -11.013 | -8.569 | 1.00 | 0.03  |
| ATOM | 2533 | N    | VAL | 268 | -11.379 | -9.413  | -5.628 | 1.00 | -0.26 |
| ATOM | 2534 | CA   | VAL | 268 | -11.258 | -7.971  | -5.847 | 1.00 | 0.13  |
| ATOM | 2535 | C    | VAL | 268 | -9.993  | -7.491  | -5.172 | 1.00 | 0.20  |
| ATOM | 2536 | O    | VAL | 268 | -9.228  | -6.763  | -5.781 | 1.00 | -0.39 |
| ATOM | 2537 | CB   | VAL | 268 | -12.508 | -7.205  | -5.317 | 1.00 | -0.01 |
| ATOM | 2538 | CG1  | VAL | 268 | -12.257 | -5.676  | -5.248 | 1.00 | -0.06 |
| ATOM | 2539 | CG2  | VAL | 268 | -13.744 | -7.483  | -6.219 | 1.00 | -0.06 |
| ATOM | 2540 | H    | VAL | 268 | -12.129 | -9.765  | -5.062 | 1.00 | 0.19  |
| ATOM | 2541 | HA   | VAL | 268 | -11.153 | -7.770  | -6.926 | 1.00 | 0.08  |
| ATOM | 2542 | HB   | VAL | 268 | -12.727 | -7.544  | -4.291 | 1.00 | 0.03  |
| ATOM | 2543 | HG13 | VAL | 268 | -11.457 | -5.444  | -4.530 | 1.00 | 0.02  |
| ATOM | 2544 | HG12 | VAL | 268 | -13.170 | -5.154  | -4.920 | 1.00 | 0.02  |
| ATOM | 2545 | HG11 | VAL | 268 | -11.964 | -5.302  | -6.242 | 1.00 | 0.02  |
| ATOM | 2546 | HG23 | VAL | 268 | -13.602 | -7.039  | -7.216 | 1.00 | 0.02  |
| ATOM | 2547 | HG22 | VAL | 268 | -14.651 | -7.049  | -5.769 | 1.00 | 0.02  |
| ATOM | 2548 | HG21 | VAL | 268 | -13.900 | -8.562  | -6.346 | 1.00 | 0.02  |
| ATOM | 2549 | N    | PHE | 269 | -9.743  | -7.887  | -3.909 | 1.00 | -0.26 |
| ATOM | 2550 | CA   | PHE | 269 | -8.500  | -7.480  | -3.252 | 1.00 | 0.14  |
| ATOM | 2551 | C    | PHE | 269 | -7.313  | -7.952  | -4.063 | 1.00 | 0.21  |
| ATOM | 2552 | O    | PHE | 269 | -6.360  | -7.203  | -4.231 | 1.00 | -0.39 |
| ATOM | 2553 | CB   | PHE | 269 | -8.453  | -8.022  | -1.798 | 1.00 | 0.02  |
| ATOM | 2554 | CG   | PHE | 269 | -9.383  | -7.281  | -0.816 | 1.00 | -0.04 |
| ATOM | 2555 | CD1  | PHE | 269 | -10.354 | -6.355  | -1.225 | 1.00 | -0.06 |
| ATOM | 2556 | CD2  | PHE | 269 | -9.244  | -7.535  | 0.554  | 1.00 | -0.06 |
| ATOM | 2557 | CE1  | PHE | 269 | -11.061 | -5.598  | -0.288 | 1.00 | -0.07 |
| ATOM | 2558 | CE2  | PHE | 269 | -9.947  | -6.778  | 1.497  | 1.00 | -0.07 |
| ATOM | 2559 | CZ   | PHE | 269 | -10.836 | -5.787  | 1.077  | 1.00 | -0.07 |
| ATOM | 2560 | H    | PHE | 269 | -10.390 | -8.485  | -3.426 | 1.00 | 0.19  |
| ATOM | 2561 | HA   | PHE | 269 | -8.421  | -6.384  | -3.214 | 1.00 | 0.08  |

|      |      |         |     |         |         |         |      |       |
|------|------|---------|-----|---------|---------|---------|------|-------|
| ATOM | 2562 | HB2 PHE | 269 | -7.422  | -7.915  | -1.431  | 1.00 | 0.05  |
| ATOM | 2563 | HB1 PHE | 269 | -8.697  | -9.093  | -1.793  | 1.00 | 0.05  |
| ATOM | 2564 | HD1 PHE | 269 | -10.587 | -6.199  | -2.269  | 1.00 | 0.06  |
| ATOM | 2565 | HD2 PHE | 269 | -8.579  | -8.322  | 0.894   | 1.00 | 0.06  |
| ATOM | 2566 | HE1 PHE | 269 | -11.789 | -4.867  | -0.625  | 1.00 | 0.06  |
| ATOM | 2567 | HE2 PHE | 269 | -9.803  | -6.953  | 2.557   | 1.00 | 0.06  |
| ATOM | 2568 | HZ PHE  | 269 | -11.349 | -5.169  | 1.804   | 1.00 | 0.06  |
| ATOM | 2569 | N ALA   | 270 | -7.343  | -9.191  | -4.597  | 1.00 | -0.26 |
| ATOM | 2570 | CA ALA  | 270 | -6.261  | -9.599  | -5.487  | 1.00 | 0.13  |
| ATOM | 2571 | C ALA   | 270 | -6.213  | -8.678  | -6.690  | 1.00 | 0.20  |
| ATOM | 2572 | O ALA   | 270 | -5.168  | -8.114  | -6.983  | 1.00 | -0.39 |
| ATOM | 2573 | CB ALA  | 270 | -6.428  | -11.061 | -5.978  | 1.00 | -0.02 |
| ATOM | 2574 | H ALA   | 270 | -8.111  | -9.819  | -4.425  | 1.00 | 0.19  |
| ATOM | 2575 | HA ALA  | 270 | -5.311  | -9.525  | -4.933  | 1.00 | 0.08  |
| ATOM | 2576 | HB3 ALA | 270 | -7.347  | -11.177 | -6.567  | 1.00 | 0.03  |
| ATOM | 2577 | HE2 ALA | 270 | -6.479  | -11.745 | -5.119  | 1.00 | 0.03  |
| ATOM | 2578 | HB1 ALA | 270 | -5.578  | -11.354 | -6.610  | 1.00 | 0.03  |
| ATOM | 2579 | N VAL   | 271 | -7.345  | -8.488  | -7.406  | 1.00 | -0.26 |
| ATOM | 2580 | CA VAL  | 271 | -7.349  | -7.672  | -8.623  | 1.00 | 0.13  |
| ATOM | 2581 | C VAL   | 271 | -7.539  | -6.221  | -8.222  | 1.00 | 0.20  |
| ATOM | 2582 | O VAL   | 271 | -8.473  | -5.555  | -8.637  | 1.00 | -0.39 |
| ATOM | 2583 | CB VAL  | 271 | -8.391  | -8.207  | -9.654  | 1.00 | -0.01 |
| ATOM | 2584 | CG1 VAL | 271 | -8.307  | -7.452  | -11.014 | 1.00 | -0.06 |
| ATOM | 2585 | CG2 VAL | 271 | -8.172  | -9.726  | -9.920  | 1.00 | -0.06 |
| ATOM | 2586 | H VAL   | 271 | -8.220  | -8.849  | -7.075  | 1.00 | 0.19  |
| ATOM | 2587 | HA VAL  | 271 | -6.368  | -7.736  | -9.121  | 1.00 | 0.08  |
| ATOM | 2588 | HB VAL  | 271 | -9.399  | -8.067  | -9.227  | 1.00 | 0.03  |
| ATOM | 2589 | HG13VAL | 271 | -8.501  | -6.376  | -10.905 | 1.00 | 0.02  |
| ATOM | 2590 | HG12VAL | 271 | -9.054  | -7.853  | -11.717 | 1.00 | 0.02  |
| ATOM | 2591 | HG11VAL | 271 | -7.310  | -7.578  | -11.463 | 1.00 | 0.02  |
| ATOM | 2592 | HG23VAL | 271 | -7.169  | -9.899  | -10.339 | 1.00 | 0.02  |
| ATOM | 2593 | HG22VAL | 271 | -8.919  | -10.101 | -10.637 | 1.00 | 0.02  |
| ATOM | 2594 | HG21VAL | 271 | -8.265  | -10.324 | -9.003  | 1.00 | 0.02  |
| ATOM | 2595 | N SER   | 272 | -6.609  | -5.707  | -7.394  | 1.00 | -0.26 |
| ATOM | 2596 | CA SER  | 272 | -6.656  | -4.310  | -6.956  | 1.00 | 0.15  |
| ATOM | 2597 | C SER   | 272 | -5.395  | -4.041  | -6.166  | 1.00 | 0.21  |
| ATOM | 2598 | O SER   | 272 | -4.661  | -3.126  | -6.502  | 1.00 | -0.39 |
| ATOM | 2599 | CB SER  | 272 | -7.877  | -3.917  | -6.080  | 1.00 | 0.08  |
| ATOM | 2600 | OG SER  | 272 | -7.719  | -4.394  | -4.730  | 1.00 | -0.39 |
| ATOM | 2601 | H SER   | 272 | -5.849  | -6.288  | -7.103  | 1.00 | 0.19  |
| ATOM | 2602 | HA SER  | 272 | -6.649  | -3.679  | -7.861  | 1.00 | 0.08  |
| ATOM | 2603 | HB2 SER | 272 | -8.807  | -4.303  | -6.527  | 1.00 | 0.06  |
| ATOM | 2604 | HB1 SER | 272 | -7.940  | -2.815  | -6.050  | 1.00 | 0.06  |
| ATOM | 2605 | HG SER  | 272 | -8.451  | -4.153  | -4.169  | 1.00 | 0.21  |
| ATOM | 2606 | N TYR   | 273 | -5.105  | -4.868  | -5.135  | 1.00 | -0.26 |
| ATOM | 2607 | CA TYR  | 273 | -3.808  | -4.776  | -4.467  | 1.00 | 0.14  |
| ATOM | 2608 | C TYR   | 273 | -2.697  | -5.380  | -5.307  | 1.00 | 0.21  |
| ATOM | 2609 | O TYR   | 273 | -1.626  | -4.797  | -5.338  | 1.00 | -0.39 |
| ATOM | 2610 | CB TYR  | 273 | -3.857  | -5.473  | -3.080  | 1.00 | 0.02  |
| ATOM | 2611 | CG TYR  | 273 | -5.047  | -5.043  | -2.201  | 1.00 | -0.05 |
| ATOM | 2612 | CD1 TYR | 273 | -5.742  | -3.842  | -2.397  | 1.00 | -0.07 |
| ATOM | 2613 | CD2 TYR | 273 | -5.455  | -5.890  | -1.164  | 1.00 | -0.07 |
| ATOM | 2614 | CE1 TYR | 273 | -6.847  | -3.521  | -1.606  | 1.00 | -0.04 |
| ATOM | 2615 | CE2 TYR | 273 | -6.552  | -5.560  | -0.362  | 1.00 | -0.04 |
| ATOM | 2616 | CZ TYR  | 273 | -7.260  | -4.377  | -0.581  | 1.00 | 0.08  |
| ATOM | 2617 | OH TYR  | 273 | -8.362  | -4.070  | 0.220   | 1.00 | -0.34 |
| ATOM | 2618 | H TYR   | 273 | -5.760  | -5.578  | -4.836  | 1.00 | 0.19  |
| ATOM | 2619 | HA TYR  | 273 | -3.534  | -3.722  | -4.302  | 1.00 | 0.08  |

|      |      |         |     |        |         |         |      |       |
|------|------|---------|-----|--------|---------|---------|------|-------|
| ATOM | 2620 | HB1 TYR | 273 | -2.925 | -5.272  | -2.528  | 1.00 | 0.05  |
| ATOM | 2621 | HB2 TYR | 273 | -3.928 | -6.559  | -3.254  | 1.00 | 0.05  |
| ATOM | 2622 | HD1 TYR | 273 | -5.448 | -3.134  | -3.162  | 1.00 | 0.05  |
| ATOM | 2623 | HD2 TYR | 273 | -4.919 | -6.814  | -0.974  | 1.00 | 0.05  |
| ATOM | 2624 | HE1 TYR | 273 | -7.381 | -2.600  | -1.797  | 1.00 | 0.05  |
| ATOM | 2625 | HE2 TYR | 273 | -6.854 | -6.224  | 0.440   | 1.00 | 0.05  |
| ATOM | 2626 | HH TYR  | 273 | -8.547 | -3.137  | 0.273   | 1.00 | 0.25  |
| ATOM | 2627 | N ILE   | 274 | -2.859 | -6.533  | -6.001  | 1.00 | -0.26 |
| ATOM | 2628 | CA ILE  | 274 | -1.700 | -7.100  | -6.705  | 1.00 | 0.13  |
| ATOM | 2629 | C ILE   | 274 | -1.111 | -6.136  | -7.723  | 1.00 | 0.21  |
| ATOM | 2630 | O ILE   | 274 | 0.105  | -6.045  | -7.757  | 1.00 | -0.39 |
| ATOM | 2631 | CB ILE  | 274 | -1.900 | -8.550  | -7.250  | 1.00 | 0.00  |
| ATOM | 2632 | CG1 ILE | 274 | -2.096 | -9.543  | -6.060  | 1.00 | -0.05 |
| ATOM | 2633 | CG2 ILE | 274 | -0.697 | -8.980  | -8.140  | 1.00 | -0.06 |
| ATOM | 2634 | CD1 ILE | 274 | -2.436 | -10.992 | -6.499  | 1.00 | -0.06 |
| ATOM | 2635 | HB ILE  | 274 | -2.801 | -8.570  | -7.881  | 1.00 | 0.03  |
| ATOM | 2636 | HG23ILE | 274 | -0.576 | -8.302  | -8.999  | 1.00 | 0.02  |
| ATOM | 2637 | HG22ILE | 274 | -0.844 | -9.987  | -8.555  | 1.00 | 0.02  |
| ATOM | 2638 | HG21ILE | 274 | 0.234  | -8.972  | -7.553  | 1.00 | 0.02  |
| ATOM | 2639 | HG12ILE | 274 | -2.922 | -9.182  | -5.430  | 1.00 | 0.03  |
| ATOM | 2640 | HG11ILE | 274 | -1.191 | -9.573  | -5.431  | 1.00 | 0.03  |
| ATOM | 2641 | HD13ILE | 274 | -3.226 | -10.985 | -7.265  | 1.00 | 0.02  |
| ATOM | 2642 | HD12ILE | 274 | -2.791 | -11.575 | -5.634  | 1.00 | 0.02  |
| ATOM | 2643 | HD11ILE | 274 | -1.554 | -11.508 | -6.907  | 1.00 | 0.02  |
| ATOM | 2644 | H ILE   | 274 | -3.742 | -7.010  | -6.031  | 1.00 | 0.19  |
| ATOM | 2645 | HA ILE  | 274 | -0.909 | -7.201  | -5.944  | 1.00 | 0.08  |
| ATOM | 2646 | N PRO   | 275 | -1.837 | -5.373  | -8.573  | 1.00 | -0.25 |
| ATOM | 2647 | CA PRO  | 275 | -1.167 | -4.337  | -9.351  | 1.00 | 0.13  |
| ATOM | 2648 | C PRO   | 275 | -0.300 | -3.430  | -8.501  | 1.00 | 0.20  |
| ATOM | 2649 | O PRO   | 275 | 0.818  | -3.117  | -8.886  | 1.00 | -0.39 |
| ATOM | 2650 | CB PRO  | 275 | -2.401 | -3.599  | -9.930  | 1.00 | -0.01 |
| ATOM | 2651 | CG PRO  | 275 | -3.472 | -4.711  | -10.028 | 1.00 | -0.03 |
| ATOM | 2652 | CD PRO  | 275 | -3.274 | -5.514  | -8.722  | 1.00 | 0.04  |
| ATOM | 2653 | HA PRO  | 275 | -0.572 | -4.811  | -10.149 | 1.00 | 0.08  |
| ATOM | 2654 | HB2 PRO | 275 | -2.190 | -3.110  | -10.894 | 1.00 | 0.03  |
| ATOM | 2655 | HB1 PRO | 275 | -2.759 | -2.836  | -9.219  | 1.00 | 0.03  |
| ATOM | 2656 | HG1 PRO | 275 | -4.497 | -4.321  | -10.139 | 1.00 | 0.03  |
| ATOM | 2657 | HG2 PRO | 275 | -3.239 | -5.356  | -10.893 | 1.00 | 0.03  |
| ATOM | 2658 | HD1 PRO | 275 | -3.776 | -5.016  | -7.888  | 1.00 | 0.05  |
| ATOM | 2659 | HD2 PRO | 275 | -3.632 | -6.550  | -8.821  | 1.00 | 0.05  |
| ATOM | 2660 | N PHE   | 276 | -0.788 | -2.993  | -7.317  | 1.00 | -0.26 |
| ATOM | 2661 | CA PHE  | 276 | 0.080  | -2.205  | -6.447  | 1.00 | 0.14  |
| ATOM | 2662 | C PHE   | 276 | 1.217  | -3.082  | -5.971  | 1.00 | 0.21  |
| ATOM | 2663 | O PHE   | 276 | 2.322  | -2.567  | -5.916  | 1.00 | -0.39 |
| ATOM | 2664 | CB PHE  | 276 | -0.649 | -1.535  | -5.260  | 1.00 | 0.02  |
| ATOM | 2665 | CG PHE  | 276 | -1.581 | -0.411  | -5.740  | 1.00 | -0.04 |
| ATOM | 2666 | CD1 PHE | 276 | -1.050 | 0.785   | -6.240  | 1.00 | -0.06 |
| ATOM | 2667 | CD2 PHE | 276 | -2.971 | -0.557  | -5.678  | 1.00 | -0.06 |
| ATOM | 2668 | CE1 PHE | 276 | -1.890 | 1.770   | -6.769  | 1.00 | -0.07 |
| ATOM | 2669 | CE2 PHE | 276 | -3.813 | 0.415   | -6.224  | 1.00 | -0.07 |
| ATOM | 2670 | CZ PHE  | 276 | -3.273 | 1.575   | -6.785  | 1.00 | -0.07 |
| ATOM | 2671 | H PHE   | 276 | -1.691 | -3.271  | -6.979  | 1.00 | 0.19  |
| ATOM | 2672 | HA PHE  | 276 | 0.520  | -1.402  | -7.051  | 1.00 | 0.08  |
| ATOM | 2673 | HB2 PHE | 276 | 0.099  | -1.092  | -4.588  | 1.00 | 0.05  |
| ATOM | 2674 | HB1 PHE | 276 | -1.195 | -2.308  | -4.706  | 1.00 | 0.05  |
| ATOM | 2675 | HD1 PHE | 276 | 0.019  | 0.957   | -6.216  | 1.00 | 0.06  |
| ATOM | 2676 | HD2 PHE | 276 | -3.405 | -1.427  | -5.201  | 1.00 | 0.06  |
| ATOM | 2677 | HE1 PHE | 276 | -1.468 | 2.687   | -7.169  | 1.00 | 0.06  |

|      |      |      |     |     |        |        |         |      |       |
|------|------|------|-----|-----|--------|--------|---------|------|-------|
| ATOM | 2678 | HE2  | PHE | 276 | -4.888 | 0.264  | -6.211  | 1.00 | 0.06  |
| ATOM | 2679 | HZ   | PHE | 276 | -3.924 | 2.322  | -7.228  | 1.00 | 0.06  |
| ATOM | 2680 | N    | HIS | 277 | 0.960  | -4.380 | -5.668  | 1.00 | -0.26 |
| ATOM | 2681 | CA   | HIS | 277 | 2.015  | -5.381 | -5.469  | 1.00 | 0.14  |
| ATOM | 2682 | C    | HIS | 277 | 3.386  | -4.902 | -5.880  | 1.00 | 0.21  |
| ATOM | 2683 | O    | HIS | 277 | 4.310  | -4.897 | -5.083  | 1.00 | -0.39 |
| ATOM | 2684 | CB   | HIS | 277 | 1.919  | -6.163 | -4.133  | 1.00 | 0.04  |
| ATOM | 2685 | CG   | HIS | 277 | 1.974  | -5.357 | -2.869  | 1.00 | 0.06  |
| ATOM | 2686 | ND1  | HIS | 277 | 2.744  | -5.641 | -1.843  | 1.00 | -0.26 |
| ATOM | 2687 | CD2  | HIS | 277 | 1.238  | -4.264 | -2.607  | 1.00 | -0.03 |
| ATOM | 2688 | CE1  | HIS | 277 | 2.561  | -4.766 | -0.907  | 1.00 | 0.09  |
| ATOM | 2689 | NE2  | HIS | 277 | 1.719  | -3.922 | -1.294  | 1.00 | -0.34 |
| ATOM | 2690 | H    | HIS | 277 | 0.012  | -4.707 | -5.655  | 1.00 | 0.19  |
| ATOM | 2691 | HA   | HIS | 277 | 1.861  | -6.181 | -6.212  | 1.00 | 0.08  |
| ATOM | 2692 | HB2  | HIS | 277 | 2.719  | -6.921 | -4.109  | 1.00 | 0.05  |
| ATOM | 2693 | HB1  | HIS | 277 | 0.943  | -6.673 | -4.110  | 1.00 | 0.05  |
| ATOM | 2694 | HD1  | HIS | 277 | 3.386  | -6.445 | -1.782  | 1.00 | 0.24  |
| ATOM | 2695 | HD2  | HIS | 277 | 0.491  | -3.776 | -3.227  | 1.00 | 0.03  |
| ATOM | 2696 | HE1  | HIS | 277 | 3.037  | -4.742 | 0.071   | 1.00 | 0.11  |
| ATOM | 2697 | N    | VAL | 278 | 3.486  | -4.509 | -7.173  | 1.00 | -0.26 |
| ATOM | 2698 | CA   | VAL | 278 | 4.735  | -3.992 | -7.728  | 1.00 | 0.13  |
| ATOM | 2699 | C    | VAL | 278 | 4.691  | -2.487 | -7.913  | 1.00 | 0.20  |
| ATOM | 2700 | O    | VAL | 278 | 5.719  | -1.869 | -7.689  | 1.00 | -0.39 |
| ATOM | 2701 | CB   | VAL | 278 | 4.984  | -4.679 | -9.104  | 1.00 | -0.01 |
| ATOM | 2702 | CG1  | VAL | 278 | 6.313  | -4.198 | -9.753  | 1.00 | -0.06 |
| ATOM | 2703 | CG2  | VAL | 278 | 5.002  | -6.226 | -8.944  | 1.00 | -0.06 |
| ATOM | 2704 | H    | VAL | 278 | 2.681  | -4.544 | -7.773  | 1.00 | 0.19  |
| ATOM | 2705 | HA   | VAL | 278 | 5.586  | -4.228 | -7.068  | 1.00 | 0.08  |
| ATOM | 2706 | HB   | VAL | 278 | 4.157  | -4.412 | -9.786  | 1.00 | 0.03  |
| ATOM | 2707 | HG13 | VAL | 278 | 6.296  | -3.114 | -9.942  | 1.00 | 0.02  |
| ATOM | 2708 | HG12 | VAL | 278 | 6.471  | -4.705 | -10.718 | 1.00 | 0.02  |
| ATOM | 2709 | HG11 | VAL | 278 | 7.165  | -4.427 | -9.097  | 1.00 | 0.02  |
| ATOM | 2710 | HG23 | VAL | 278 | 5.810  | -6.530 | -8.261  | 1.00 | 0.02  |
| ATOM | 2711 | HG22 | VAL | 278 | 5.167  | -6.711 | -9.919  | 1.00 | 0.02  |
| ATOM | 2712 | HG21 | VAL | 278 | 4.047  | -6.596 | -8.541  | 1.00 | 0.02  |
| ATOM | 2713 | N    | MET | 279 | 3.569  | -1.852 | -8.336  | 1.00 | -0.26 |
| ATOM | 2714 | CA   | MET | 279 | 3.626  | -0.428 | -8.681  | 1.00 | 0.13  |
| ATOM | 2715 | C    | MET | 279 | 4.407  | 0.388  | -7.676  | 1.00 | 0.20  |
| ATOM | 2716 | O    | MET | 279 | 5.143  | 1.267  | -8.095  | 1.00 | -0.39 |
| ATOM | 2717 | CB   | MET | 279 | 2.231  | 0.247  | -8.800  | 1.00 | 0.00  |
| ATOM | 2718 | CG   | MET | 279 | 2.306  | 1.640  | -9.482  | 1.00 | 0.00  |
| ATOM | 2719 | SD   | MET | 279 | 0.677  | 2.452  | -9.395  | 1.00 | -0.16 |
| ATOM | 2720 | CE   | MET | 279 | 1.034  | 3.943  | -10.377 | 1.00 | -0.02 |
| ATOM | 2721 | H    | MET | 279 | 2.709  | -2.345 | -8.496  | 1.00 | 0.19  |
| ATOM | 2722 | HA   | MET | 279 | 4.134  | -0.359 | -9.657  | 1.00 | 0.08  |
| ATOM | 2723 | HB2  | MET | 279 | 1.819  | 0.380  | -7.791  | 1.00 | 0.03  |
| ATOM | 2724 | HB1  | MET | 279 | 1.544  | -0.388 | -9.383  | 1.00 | 0.03  |
| ATOM | 2725 | HG2  | MET | 279 | 2.597  | 1.528  | -10.537 | 1.00 | 0.04  |
| ATOM | 2726 | HG1  | MET | 279 | 3.026  | 2.302  | -8.979  | 1.00 | 0.04  |
| ATOM | 2727 | LPD2 | MET | 279 | 0.380  | 3.176  | -8.666  | 1.00 | 0.00  |
| ATOM | 2728 | LPD1 | MET | 279 | 0.053  | 2.424  | -9.412  | 1.00 | 0.00  |
| ATOM | 2729 | HE3  | MET | 279 | 1.927  | 4.449  | -9.985  | 1.00 | 0.03  |
| ATOM | 2730 | HE2  | MET | 279 | 0.174  | 4.628  | -10.324 | 1.00 | 0.03  |
| ATOM | 2731 | HE1  | MET | 279 | 1.210  | 3.662  | -11.426 | 1.00 | 0.03  |
| ATOM | 2732 | N    | LYS | 280 | 4.281  | 0.154  | -6.350  | 1.00 | -0.26 |
| ATOM | 2733 | CA   | LYS | 280 | 5.029  | 1.004  | -5.421  | 1.00 | 0.13  |
| ATOM | 2734 | C    | LYS | 280 | 6.511  | 1.014  | -5.710  | 1.00 | 0.20  |
| ATOM | 2735 | O    | LYS | 280 | 7.153  | 2.007  | -5.404  | 1.00 | -0.39 |

|      |      |      |     |     |        |        |         |      |       |
|------|------|------|-----|-----|--------|--------|---------|------|-------|
| ATOM | 2736 | CB   | LYS | 280 | 4.758  | 0.808  | -3.904  | 1.00 | -0.01 |
| ATOM | 2737 | CG   | LYS | 280 | 5.484  | -0.386 | -3.219  | 1.00 | -0.04 |
| ATOM | 2738 | CD   | LYS | 280 | 4.928  | -1.789 | -3.577  | 1.00 | -0.01 |
| ATOM | 2739 | CE   | LYS | 280 | 3.425  | -1.991 | -3.228  | 1.00 | -0.04 |
| ATOM | 2740 | NZ   | LYS | 280 | 3.048  | -1.723 | -1.815  | 1.00 | 0.22  |
| ATOM | 2741 | H    | LYS | 280 | 3.679  | -0.574 | -6.017  | 1.00 | 0.19  |
| ATOM | 2742 | HA   | LYS | 280 | 4.688  | 2.023  | -5.659  | 1.00 | 0.08  |
| ATOM | 2743 | HB2  | LYS | 280 | 3.669  | 0.775  | -3.767  | 1.00 | 0.03  |
| ATOM | 2744 | HB1  | LYS | 280 | 5.124  | 1.709  | -3.383  | 1.00 | 0.03  |
| ATOM | 2745 | HG2  | LYS | 280 | 5.412  | -0.265 | -2.126  | 1.00 | 0.03  |
| ATOM | 2746 | HG1  | LYS | 280 | 6.558  | -0.353 | -3.466  | 1.00 | 0.03  |
| ATOM | 2747 | HD2  | LYS | 280 | 5.514  | -2.540 | -3.020  | 1.00 | 0.03  |
| ATOM | 2748 | HD1  | LYS | 280 | 5.091  | -1.986 | -4.649  | 1.00 | 0.03  |
| ATOM | 2749 | HE2  | LYS | 280 | 3.219  | -3.039 | -3.489  | 1.00 | 0.08  |
| ATOM | 2750 | HE1  | LYS | 280 | 2.780  | -1.374 | -3.869  | 1.00 | 0.08  |
| ATOM | 2751 | HZ3  | LYS | 280 | 2.044  | -2.061 | -1.581  | 1.00 | 0.20  |
| ATOM | 2752 | HZ2  | LYS | 280 | 3.041  | -0.669 | -1.575  | 1.00 | 0.20  |
| ATOM | 2753 | HZ1  | LYS | 280 | 3.692  | -2.217 | -1.107  | 1.00 | 0.20  |
| ATOM | 2754 | N    | THR | 281 | 7.079  | -0.047 | -6.325  | 1.00 | -0.26 |
| ATOM | 2755 | CA   | THR | 281 | 8.463  | 0.039  | -6.786  | 1.00 | 0.16  |
| ATOM | 2756 | C    | THR | 281 | 8.677  | 1.340  | -7.531  | 1.00 | 0.21  |
| ATOM | 2757 | O    | THR | 281 | 9.751  | 1.908  | -7.430  | 1.00 | -0.39 |
| ATOM | 2758 | CB   | THR | 281 | 8.829  | -1.171 | -7.688  | 1.00 | 0.09  |
| ATOM | 2759 | OG1  | THR | 281 | 8.592  | -2.360 | -6.911  | 1.00 | -0.39 |
| ATOM | 2760 | CG2  | THR | 281 | 10.315 | -1.130 | -8.138  | 1.00 | -0.03 |
| ATOM | 2761 | H    | THR | 281 | 6.561  | -0.882 | -6.540  | 1.00 | 0.19  |
| ATOM | 2762 | HA   | THR | 281 | 9.123  | 0.001  | -5.909  | 1.00 | 0.08  |
| ATOM | 2763 | HB   | THR | 281 | 8.168  | -1.157 | -8.573  | 1.00 | 0.06  |
| ATOM | 2764 | HG1  | THR | 281 | 8.736  | -3.165 | -7.399  | 1.00 | 0.21  |
| ATOM | 2765 | HG22 | THR | 281 | 10.550 | -2.021 | -8.742  | 1.00 | 0.03  |
| ATOM | 2766 | HG21 | THR | 281 | 10.979 | -1.120 | -7.259  | 1.00 | 0.03  |
| ATOM | 2767 | HG23 | THR | 281 | 10.521 | -0.239 | -8.749  | 1.00 | 0.03  |
| ATOM | 2768 | N    | MET | 282 | 7.673  | 1.854  | -8.276  | 1.00 | -0.26 |
| ATOM | 2769 | CA   | MET | 282 | 7.829  | 3.151  | -8.931  | 1.00 | 0.13  |
| ATOM | 2770 | C    | MET | 282 | 8.099  | 4.235  | -7.908  | 1.00 | 0.20  |
| ATOM | 2771 | O    | MET | 282 | 9.079  | 4.950  | -8.056  | 1.00 | -0.39 |
| ATOM | 2772 | CB   | MET | 282 | 6.569  | 3.577  | -9.740  | 1.00 | 0.00  |
| ATOM | 2773 | CG   | MET | 282 | 6.261  | 2.627  | -10.927 | 1.00 | 0.00  |
| ATOM | 2774 | SD   | MET | 282 | 4.728  | 3.205  | -11.726 | 1.00 | -0.16 |
| ATOM | 2775 | CE   | MET | 282 | 4.481  | 1.872  | -12.941 | 1.00 | -0.02 |
| ATOM | 2776 | LPD1 | MET | 282 | 5.383  | 2.013  | -11.531 | 1.00 | 0.00  |
| ATOM | 2777 | LPD2 | MET | 282 | 6.312  | 2.505  | -12.352 | 1.00 | 0.00  |
| ATOM | 2778 | HB2  | MET | 282 | 5.694  | 3.611  | -9.072  | 1.00 | 0.03  |
| ATOM | 2779 | HB1  | MET | 282 | 6.724  | 4.592  | -10.143 | 1.00 | 0.03  |
| ATOM | 2780 | HG2  | MET | 282 | 6.103  | 1.592  | -10.592 | 1.00 | 0.04  |
| ATOM | 2781 | HG1  | MET | 282 | 7.082  | 2.641  | -11.661 | 1.00 | 0.04  |
| ATOM | 2782 | HE3  | MET | 282 | 5.337  | 1.833  | -13.631 | 1.00 | 0.03  |
| ATOM | 2783 | HE2  | MET | 282 | 3.563  | 2.074  | -13.513 | 1.00 | 0.03  |
| ATOM | 2784 | HE1  | MET | 282 | 4.381  | 0.905  | -12.427 | 1.00 | 0.03  |
| ATOM | 2785 | H    | MET | 282 | 6.794  | 1.381  | -8.342  | 1.00 | 0.19  |
| ATOM | 2786 | HA   | MET | 282 | 8.689  | 3.099  | -9.620  | 1.00 | 0.08  |
| ATOM | 2787 | N    | ASN | 283 | 7.257  | 4.408  | -6.862  | 1.00 | -0.26 |
| ATOM | 2788 | CA   | ASN | 283 | 7.523  | 5.492  | -5.915  | 1.00 | 0.15  |
| ATOM | 2789 | C    | ASN | 283 | 8.733  | 5.151  | -5.080  | 1.00 | 0.21  |
| ATOM | 2790 | O    | ASN | 283 | 9.541  | 6.030  | -4.840  | 1.00 | -0.39 |
| ATOM | 2791 | CB   | ASN | 283 | 6.326  | 5.964  | -5.044  | 1.00 | 0.08  |
| ATOM | 2792 | CG   | ASN | 283 | 5.618  | 4.962  | -4.164  | 1.00 | 0.18  |
| ATOM | 2793 | OD1  | ASN | 283 | 6.071  | 4.729  | -3.057  | 1.00 | -0.40 |

|      |      |         |     |        |       |         |      |       |
|------|------|---------|-----|--------|-------|---------|------|-------|
| ATOM | 2794 | ND2 ASN | 283 | 4.479  | 4.371 | -4.578  | 1.00 | -0.30 |
| ATOM | 2795 | H ASN   | 283 | 6.504  | 3.771 | -6.688  | 1.00 | 0.19  |
| ATOM | 2796 | HA ASN  | 283 | 7.812  | 6.384 | -6.500  | 1.00 | 0.08  |
| ATOM | 2797 | HB2 ASN | 283 | 5.575  | 6.411 | -5.709  | 1.00 | 0.06  |
| ATOM | 2798 | HB1 ASN | 283 | 6.693  | 6.755 | -4.374  | 1.00 | 0.06  |
| ATOM | 2799 | HD21ASN | 283 | 4.089  | 4.540 | -5.482  | 1.00 | 0.18  |
| ATOM | 2800 | HD22ASN | 283 | 3.995  | 3.762 | -3.945  | 1.00 | 0.18  |
| ATOM | 2801 | N LEU   | 284 | 8.926  | 3.896 | -4.634  | 1.00 | -0.26 |
| ATOM | 2802 | CA LEU  | 284 | 10.168 | 3.582 | -3.921  | 1.00 | 0.13  |
| ATOM | 2803 | C LEU   | 284 | 11.366 | 3.846 | -4.811  | 1.00 | 0.20  |
| ATOM | 2804 | O LEU   | 284 | 12.366 | 4.337 | -4.314  | 1.00 | -0.39 |
| ATOM | 2805 | CB LEU  | 284 | 10.206 | 2.108 | -3.427  | 1.00 | -0.01 |
| ATOM | 2806 | CG LEU  | 284 | 9.515  | 1.876 | -2.049  | 1.00 | -0.04 |
| ATOM | 2807 | CD1 LEU | 284 | 10.434 | 2.325 | -0.876  | 1.00 | -0.06 |
| ATOM | 2808 | CD2 LEU | 284 | 8.111  | 2.530 | -1.937  | 1.00 | -0.06 |
| ATOM | 2809 | H LEU   | 284 | 8.256  | 3.177 | -4.842  | 1.00 | 0.19  |
| ATOM | 2810 | HA LEU  | 284 | 10.279 | 4.269 | -3.068  | 1.00 | 0.08  |
| ATOM | 2811 | HB2 LEU | 284 | 11.252 | 1.770 | -3.345  | 1.00 | 0.03  |
| ATOM | 2812 | HB1 LEU | 284 | 9.736  | 1.476 | -4.192  | 1.00 | 0.03  |
| ATOM | 2813 | HG LEU  | 284 | 9.341  | 0.791 | -1.956  | 1.00 | 0.03  |
| ATOM | 2814 | HD13LEU | 284 | 11.438 | 1.881 | -0.954  | 1.00 | 0.02  |
| ATOM | 2815 | HD12LEU | 284 | 9.999  | 2.004 | 0.082   | 1.00 | 0.02  |
| ATOM | 2816 | HD11LEU | 284 | 10.557 | 3.417 | -0.860  | 1.00 | 0.02  |
| ATOM | 2817 | HD23LEU | 284 | 7.632  | 2.250 | -0.986  | 1.00 | 0.02  |
| ATOM | 2818 | HD22LEU | 284 | 8.176  | 3.627 | -1.977  | 1.00 | 0.02  |
| ATOM | 2819 | HD21LEU | 284 | 7.465  | 2.183 | -2.755  | 1.00 | 0.02  |
| ATOM | 2820 | N ARG   | 285 | 11.313 | 3.531 | -6.121  | 1.00 | -0.26 |
| ATOM | 2821 | CA ARG  | 285 | 12.456 | 3.829 | -6.983  | 1.00 | 0.13  |
| ATOM | 2822 | C ARG   | 285 | 12.581 | 5.319 | -7.213  | 1.00 | 0.20  |
| ATOM | 2823 | O ARG   | 285 | 13.687 | 5.833 | -7.189  | 1.00 | -0.39 |
| ATOM | 2824 | CB ARG  | 285 | 12.318 | 3.144 | -8.372  | 1.00 | -0.01 |
| ATOM | 2825 | CG ARG  | 285 | 13.580 | 3.365 | -9.254  | 1.00 | -0.02 |
| ATOM | 2826 | CD ARG  | 285 | 13.514 | 2.555 | -10.579 | 1.00 | 0.06  |
| ATOM | 2827 | NE ARG  | 285 | 14.697 | 2.793 | -11.418 | 1.00 | -0.27 |
| ATOM | 2828 | CZ ARG  | 285 | 14.892 | 2.231 | -12.590 | 1.00 | 0.29  |
| ATOM | 2829 | NH1 ARG | 285 | 14.036 | 1.394 | -13.123 | 1.00 | -0.28 |
| ATOM | 2830 | NH2 ARG | 285 | 15.983 | 2.514 | -13.258 | 1.00 | -0.28 |
| ATOM | 2831 | H ARG   | 285 | 10.491 | 3.119 | -6.523  | 1.00 | 0.19  |
| ATOM | 2832 | HA ARG  | 285 | 13.375 | 3.461 | -6.498  | 1.00 | 0.08  |
| ATOM | 2833 | HB2 ARG | 285 | 11.431 | 3.539 | -8.893  | 1.00 | 0.03  |
| ATOM | 2834 | HB1 ARG | 285 | 12.162 | 2.067 | -8.217  | 1.00 | 0.03  |
| ATOM | 2835 | HG2 ARG | 285 | 14.481 | 3.058 | -8.697  | 1.00 | 0.03  |
| ATOM | 2836 | HG1 ARG | 285 | 13.675 | 4.436 | -9.497  | 1.00 | 0.03  |
| ATOM | 2837 | HD2 ARG | 285 | 12.600 | 2.865 | -11.113 | 1.00 | 0.07  |
| ATOM | 2838 | HD1 ARG | 285 | 13.444 | 1.486 | -10.315 | 1.00 | 0.07  |
| ATOM | 2839 | HE ARG  | 285 | 15.408 | 3.445 | -11.050 | 1.00 | 0.26  |
| ATOM | 2840 | HH11ARG | 285 | 13.166 | 1.136 | -12.645 | 1.00 | 0.26  |
| ATOM | 2841 | HH12ARG | 285 | 14.211 | 0.966 | -14.043 | 1.00 | 0.26  |
| ATOM | 2842 | HH21ARG | 285 | 16.687 | 3.167 | -12.884 | 1.00 | 0.26  |
| ATOM | 2843 | HH22ARG | 285 | 16.173 | 2.095 | -14.180 | 1.00 | 0.26  |
| ATOM | 2844 | N ALA   | 286 | 11.464 | 6.031 | -7.477  | 1.00 | -0.26 |
| ATOM | 2845 | CA ALA  | 286 | 11.560 | 7.454 | -7.807  | 1.00 | 0.13  |
| ATOM | 2846 | C ALA   | 286 | 11.636 | 8.359 | -6.595  | 1.00 | 0.20  |
| ATOM | 2847 | O ALA   | 286 | 12.115 | 9.475 | -6.734  | 1.00 | -0.39 |
| ATOM | 2848 | CB ALA  | 286 | 10.335 | 7.862 | -8.666  | 1.00 | -0.02 |
| ATOM | 2849 | H ALA   | 286 | 10.559 | 5.593 | -7.461  | 1.00 | 0.19  |
| ATOM | 2850 | HA ALA  | 286 | 12.465 | 7.639 | -8.412  | 1.00 | 0.08  |
| ATOM | 2851 | HB3 ALA | 286 | 9.404  | 7.712 | -8.101  | 1.00 | 0.03  |

|      |      |      |     |     |        |        |        |      |       |
|------|------|------|-----|-----|--------|--------|--------|------|-------|
| ATOM | 2852 | HB2  | ALA | 286 | 10.293 | 7.243  | -9.576 | 1.00 | 0.03  |
| ATOM | 2853 | HB1  | ALA | 286 | 10.403 | 8.921  | -8.962 | 1.00 | 0.03  |
| ATOM | 2854 | N    | ARG | 287 | 11.179 | 7.961  | -5.390 | 1.00 | -0.26 |
| ATOM | 2855 | CA   | ARG | 287 | 11.173 | 8.900  | -4.263 | 1.00 | 0.13  |
| ATOM | 2856 | C    | ARG | 287 | 12.579 | 9.134  | -3.749 | 1.00 | 0.25  |
| ATOM | 2857 | O    | ARG | 287 | 12.890 | 8.811  | -2.614 | 1.00 | -0.33 |
| ATOM | 2858 | CB   | ARG | 287 | 10.206 | 8.402  | -3.151 | 1.00 | -0.01 |
| ATOM | 2859 | CG   | ARG | 287 | 9.884  | 9.474  | -2.070 | 1.00 | -0.02 |
| ATOM | 2860 | CD   | ARG | 287 | 8.872  | 8.923  | -1.024 | 1.00 | 0.06  |
| ATOM | 2861 | NE   | ARG | 287 | 8.201  | 10.017 | -0.312 | 1.00 | -0.27 |
| ATOM | 2862 | CZ   | ARG | 287 | 8.677  | 10.649 | 0.737  | 1.00 | 0.29  |
| ATOM | 2863 | NH1  | ARG | 287 | 9.864  | 10.411 | 1.233  | 1.00 | -0.28 |
| ATOM | 2864 | NH2  | ARG | 287 | 7.936  | 11.561 | 1.316  | 1.00 | -0.28 |
| ATOM | 2865 | H    | ARG | 287 | 10.830 | 7.029  | -5.253 | 1.00 | 0.19  |
| ATOM | 2866 | HA   | ARG | 287 | 10.794 | 9.875  | -4.609 | 1.00 | 0.08  |
| ATOM | 2867 | HB2  | ARG | 287 | 10.619 | 7.494  | -2.682 | 1.00 | 0.03  |
| ATOM | 2868 | HB1  | ARG | 287 | 9.258  | 8.133  | -3.640 | 1.00 | 0.03  |
| ATOM | 2869 | HG2  | ARG | 287 | 9.442  | 10.358 | -2.557 | 1.00 | 0.03  |
| ATOM | 2870 | HG1  | ARG | 287 | 10.806 | 9.803  | -1.570 | 1.00 | 0.03  |
| ATOM | 2871 | HD2  | ARG | 287 | 9.335  | 8.175  | -0.361 | 1.00 | 0.07  |
| ATOM | 2872 | HD1  | ARG | 287 | 8.084  | 8.369  | -1.565 | 1.00 | 0.07  |
| ATOM | 2873 | HE   | ARG | 287 | 7.267  | 10.298 | -0.676 | 1.00 | 0.26  |
| ATOM | 2874 | HH11 | ARG | 287 | 10.495 | 9.724  | 0.810  | 1.00 | 0.26  |
| ATOM | 2875 | HH12 | ARG | 287 | 10.211 | 10.931 | 2.050  | 1.00 | 0.26  |
| ATOM | 2876 | HH21 | ARG | 287 | 6.984  | 11.781 | 0.970  | 1.00 | 0.26  |
| ATOM | 2877 | HH22 | ARG | 287 | 8.263  | 12.088 | 2.133  | 1.00 | 0.26  |
| TER  | 2878 | ARG  | 287 |     |        |        |        |      |       |
| ATOM | 2879 | C    | ACE | 299 | 6.203  | 12.451 | -5.124 | 1.00 | 0.18  |
| ATOM | 2880 | O    | ACE | 299 | 5.290  | 12.201 | -5.894 | 1.00 | -0.40 |
| ATOM | 2881 | CH3  | ACE | 299 | 7.602  | 12.588 | -5.663 | 1.00 | 0.03  |
| ATOM | 2882 | H    | ACE | 299 | 8.314  | 12.045 | -5.025 | 1.00 | 0.05  |
| ATOM | 2883 | H    | ACE | 299 | 7.875  | 13.653 | -5.681 | 1.00 | 0.05  |
| ATOM | 2884 | H    | ACE | 299 | 7.660  | 12.189 | -6.686 | 1.00 | 0.05  |
| ATOM | 2885 | N    | ASP | 300 | 5.993  | 12.627 | -3.804 | 1.00 | -0.26 |
| ATOM | 2886 | CA   | ASP | 300 | 4.646  | 12.475 | -3.253 | 1.00 | 0.14  |
| ATOM | 2887 | C    | ASP | 300 | 3.586  | 13.206 | -4.050 | 1.00 | 0.21  |
| ATOM | 2888 | O    | ASP | 300 | 2.488  | 12.680 | -4.146 | 1.00 | -0.39 |
| ATOM | 2889 | CB   | ASP | 300 | 4.591  | 12.829 | -1.745 | 1.00 | 0.03  |
| ATOM | 2890 | CG   | ASP | 300 | 5.490  | 11.912 | -0.958 | 1.00 | 0.03  |
| ATOM | 2891 | OD1  | ASP | 300 | 6.136  | 10.993 | -1.531 | 1.00 | -0.57 |
| ATOM | 2892 | OD2  | ASP | 300 | 5.613  | 12.068 | 0.283  | 1.00 | -0.57 |
| ATOM | 2893 | H    | ASP | 300 | 6.752  | 12.784 | -3.168 | 1.00 | 0.19  |
| ATOM | 2894 | HA   | ASP | 300 | 4.379  | 11.415 | -3.324 | 1.00 | 0.08  |
| ATOM | 2895 | HB2  | ASP | 300 | 3.566  | 12.714 | -1.361 | 1.00 | 0.05  |
| ATOM | 2896 | HB1  | ASP | 300 | 4.912  | 13.870 | -1.593 | 1.00 | 0.05  |
| ATOM | 2897 | N    | ARG | 301 | 3.834  | 14.386 | -4.662 | 1.00 | -0.26 |
| ATOM | 2898 | CA   | ARG | 301 | 2.792  | 14.967 | -5.516 | 1.00 | 0.13  |
| ATOM | 2899 | C    | ARG | 301 | 2.596  | 14.120 | -6.759 | 1.00 | 0.20  |
| ATOM | 2900 | O    | ARG | 301 | 1.471  | 13.969 | -7.205 | 1.00 | -0.39 |
| ATOM | 2901 | CB   | ARG | 301 | 3.060  | 16.442 | -5.925 | 1.00 | -0.01 |
| ATOM | 2902 | CG   | ARG | 301 | 1.777  | 17.102 | -6.516 | 1.00 | -0.02 |
| ATOM | 2903 | CD   | ARG | 301 | 1.993  | 18.584 | -6.932 | 1.00 | 0.06  |
| ATOM | 2904 | NE   | ARG | 301 | 0.724  | 19.231 | -7.298 | 1.00 | -0.27 |
| ATOM | 2905 | CZ   | ARG | 301 | 0.618  | 20.492 | -7.656 | 1.00 | 0.29  |
| ATOM | 2906 | NH1  | ARG | 301 | 1.655  | 21.285 | -7.765 | 1.00 | -0.28 |
| ATOM | 2907 | NH2  | ARG | 301 | -0.569 | 20.983 | -7.913 | 1.00 | -0.28 |
| ATOM | 2908 | HB2  | ARG | 301 | 3.366  | 17.002 | -5.026 | 1.00 | 0.03  |
| ATOM | 2909 | HB1  | ARG | 301 | 3.887  | 16.478 | -6.653 | 1.00 | 0.03  |

|      |      |         |     |        |        |         |      |       |
|------|------|---------|-----|--------|--------|---------|------|-------|
| ATOM | 2910 | HG2 ARG | 301 | 0.982  | 17.067 | -5.752  | 1.00 | 0.03  |
| ATOM | 2911 | HG1 ARG | 301 | 1.430  | 16.540 | -7.398  | 1.00 | 0.03  |
| ATOM | 2912 | HD2 ARG | 301 | 2.701  | 18.596 | -7.777  | 1.00 | 0.07  |
| ATOM | 2913 | HD1 ARG | 301 | 2.436  | 19.113 | -6.070  | 1.00 | 0.07  |
| ATOM | 2914 | HE ARG  | 301 | -0.130 | 18.651 | -7.253  | 1.00 | 0.26  |
| ATOM | 2915 | HH21ARG | 301 | -1.417 | 20.414 | -7.816  | 1.00 | 0.26  |
| ATOM | 2916 | HH22ARG | 301 | -0.701 | 21.963 | -8.203  | 1.00 | 0.26  |
| ATOM | 2917 | HH11ARG | 301 | 2.607  | 20.956 | -7.576  | 1.00 | 0.26  |
| ATOM | 2918 | HH12ARG | 301 | 1.544  | 22.270 | -8.044  | 1.00 | 0.26  |
| ATOM | 2919 | H ARG   | 301 | 4.727  | 14.830 | -4.587  | 1.00 | 0.19  |
| ATOM | 2920 | HA ARG  | 301 | 1.853  | 14.956 | -4.938  | 1.00 | 0.08  |
| ATOM | 2921 | N VAL   | 302 | 3.654  | 13.525 | -7.350  | 1.00 | -0.26 |
| ATOM | 2922 | CA VAL  | 302 | 3.422  | 12.590 | -8.453  | 1.00 | 0.13  |
| ATOM | 2923 | C VAL   | 302 | 2.637  | 11.430 | -7.887  | 1.00 | 0.20  |
| ATOM | 2924 | O VAL   | 302 | 1.685  | 10.976 | -8.502  | 1.00 | -0.39 |
| ATOM | 2925 | CB VAL  | 302 | 4.738  | 12.065 | -9.105  | 1.00 | -0.01 |
| ATOM | 2926 | CG1 VAL | 302 | 4.444  | 10.958 | -10.159 | 1.00 | -0.06 |
| ATOM | 2927 | CG2 VAL | 302 | 5.526  | 13.231 | -9.766  | 1.00 | -0.06 |
| ATOM | 2928 | H VAL   | 302 | 4.573  | 13.597 | -6.959  | 1.00 | 0.19  |
| ATOM | 2929 | HA VAL  | 302 | 2.808  | 13.076 | -9.229  | 1.00 | 0.08  |
| ATOM | 2930 | HB VAL  | 302 | 5.374  | 11.612 | -8.326  | 1.00 | 0.03  |
| ATOM | 2931 | HG13VAL | 302 | 3.978  | 10.078 | -9.691  | 1.00 | 0.02  |
| ATOM | 2932 | HG12VAL | 302 | 5.379  | 10.625 | -10.637 | 1.00 | 0.02  |
| ATOM | 2933 | HG11VAL | 302 | 3.768  | 11.340 | -10.938 | 1.00 | 0.02  |
| ATOM | 2934 | HG23VAL | 302 | 4.929  | 13.688 | -10.569 | 1.00 | 0.02  |
| ATOM | 2935 | HG22VAL | 302 | 6.467  | 12.859 | -10.199 | 1.00 | 0.02  |
| ATOM | 2936 | HG21VAL | 302 | 5.776  | 14.010 | -9.031  | 1.00 | 0.02  |
| ATOM | 2937 | N TYR   | 303 | 2.996  | 10.919 | -6.694  | 1.00 | -0.26 |
| ATOM | 2938 | CA TYR  | 303 | 2.218  | 9.809  | -6.146  | 1.00 | 0.14  |
| ATOM | 2939 | C TYR   | 303 | 0.823  | 10.288 | -5.799  | 1.00 | 0.21  |
| ATOM | 2940 | O TYR   | 303 | -0.100 | 9.490  | -5.843  | 1.00 | -0.39 |
| ATOM | 2941 | CB TYR  | 303 | 2.957  | 9.108  | -4.978  | 1.00 | 0.02  |
| ATOM | 2942 | CG TYR  | 303 | 4.473  | 9.038  | -5.241  | 1.00 | -0.05 |
| ATOM | 2943 | CD1 TYR | 303 | 5.005  | 8.884  | -6.528  | 1.00 | -0.07 |
| ATOM | 2944 | CD2 TYR | 303 | 5.360  | 9.170  | -4.168  | 1.00 | -0.07 |
| ATOM | 2945 | CE1 TYR | 303 | 6.376  | 9.033  | -6.758  | 1.00 | -0.04 |
| ATOM | 2946 | CE2 TYR | 303 | 6.710  | 9.428  | -4.405  | 1.00 | -0.04 |
| ATOM | 2947 | CZ TYR  | 303 | 7.233  | 9.344  | -5.696  | 1.00 | 0.08  |
| ATOM | 2948 | OH TYR  | 303 | 8.596  | 9.567  | -5.899  | 1.00 | -0.34 |
| ATOM | 2949 | H TYR   | 303 | 3.756  | 11.319 | -6.169  | 1.00 | 0.19  |
| ATOM | 2950 | HA TYR  | 303 | 2.090  | 9.055  | -6.939  | 1.00 | 0.08  |
| ATOM | 2951 | HB1 TYR | 303 | 2.559  | 8.095  | -4.809  | 1.00 | 0.05  |
| ATOM | 2952 | HB2 TYR | 303 | 2.770  | 9.707  | -4.074  | 1.00 | 0.05  |
| ATOM | 2953 | HD1 TYR | 303 | 4.365  | 8.655  | -7.371  | 1.00 | 0.05  |
| ATOM | 2954 | HD2 TYR | 303 | 5.008  | 9.091  | -3.146  | 1.00 | 0.05  |
| ATOM | 2955 | HE1 TYR | 303 | 6.768  | 8.910  | -7.763  | 1.00 | 0.05  |
| ATOM | 2956 | HE2 TYR | 303 | 7.353  | 9.699  | -3.579  | 1.00 | 0.05  |
| ATOM | 2957 | HH TYR  | 303 | 8.828  | 9.763  | -6.799  | 1.00 | 0.25  |
| ATOM | 2958 | N ALA   | 304 | 0.605  | 11.585 | -5.484  | 1.00 | -0.26 |
| ATOM | 2959 | CA ALA  | 304 | -0.766 | 12.081 | -5.386  | 1.00 | 0.13  |
| ATOM | 2960 | C ALA   | 304 | -1.482 | 11.836 | -6.698  | 1.00 | 0.20  |
| ATOM | 2961 | O ALA   | 304 | -2.668 | 11.554 | -6.672  | 1.00 | -0.39 |
| ATOM | 2962 | CB ALA  | 304 | -0.877 | 13.575 | -4.989  | 1.00 | -0.02 |
| ATOM | 2963 | H ALA   | 304 | 1.361  | 12.229 | -5.357  | 1.00 | 0.19  |
| ATOM | 2964 | HA ALA  | 304 | -1.267 | 11.504 | -4.596  | 1.00 | 0.08  |
| ATOM | 2965 | HB3 ALA | 304 | -0.470 | 14.227 | -5.771  | 1.00 | 0.03  |
| ATOM | 2966 | HB2 ALA | 304 | -0.331 | 13.757 | -4.051  | 1.00 | 0.03  |
| ATOM | 2967 | HB1 ALA | 304 | -1.935 | 13.845 | -4.839  | 1.00 | 0.03  |

|      |      |      |     |     |        |        |         |      |       |
|------|------|------|-----|-----|--------|--------|---------|------|-------|
| ATOM | 2968 | N    | THR | 305 | -0.817 | 11.898 | -7.873  | 1.00 | -0.26 |
| ATOM | 2969 | CA   | THR | 305 | -1.507 | 11.468 | -9.088  | 1.00 | 0.16  |
| ATOM | 2970 | C    | THR | 305 | -1.873 | 10.007 | -8.928  | 1.00 | 0.21  |
| ATOM | 2971 | O    | THR | 305 | -3.010 | 9.644  | -9.187  | 1.00 | -0.39 |
| ATOM | 2972 | CB   | THR | 305 | -0.671 | 11.663 | -10.384 | 1.00 | 0.09  |
| ATOM | 2973 | OG1  | THR | 305 | -0.177 | 13.015 | -10.401 | 1.00 | -0.39 |
| ATOM | 2974 | CG2  | THR | 305 | -1.527 | 11.399 | -11.652 | 1.00 | -0.03 |
| ATOM | 2975 | H    | THR | 305 | 0.148  | 12.169 | -7.932  | 1.00 | 0.19  |
| ATOM | 2976 | HA   | THR | 305 | -2.426 | 12.069 | -9.190  | 1.00 | 0.08  |
| ATOM | 2977 | HB   | THR | 305 | 0.175  | 10.955 | -10.382 | 1.00 | 0.06  |
| ATOM | 2978 | HG1  | THR | 305 | 0.382  | 13.199 | -11.150 | 1.00 | 0.21  |
| ATOM | 2979 | HG22 | THR | 305 | -0.912 | 11.521 | -12.557 | 1.00 | 0.03  |
| ATOM | 2980 | HG21 | THR | 305 | -2.363 | 12.114 | -11.700 | 1.00 | 0.03  |
| ATOM | 2981 | HG23 | THR | 305 | -1.934 | 10.376 | -11.645 | 1.00 | 0.03  |
| ATOM | 2982 | N    | TYR | 306 | -0.947 | 9.130  | -8.481  | 1.00 | -0.26 |
| ATOM | 2983 | CA   | TYR | 306 | -1.330 | 7.731  | -8.259  | 1.00 | 0.14  |
| ATOM | 2984 | C    | TYR | 306 | -2.481 | 7.660  | -7.273  | 1.00 | 0.21  |
| ATOM | 2985 | O    | TYR | 306 | -3.328 | 6.787  | -7.395  | 1.00 | -0.39 |
| ATOM | 2986 | CB   | TYR | 306 | -0.190 | 6.840  | -7.689  | 1.00 | 0.02  |
| ATOM | 2987 | CG   | TYR | 306 | 1.156  | 6.864  | -8.435  | 1.00 | -0.05 |
| ATOM | 2988 | CD1  | TYR | 306 | 1.332  | 7.452  | -9.694  | 1.00 | -0.07 |
| ATOM | 2989 | CD2  | TYR | 306 | 2.257  | 6.263  | -7.813  | 1.00 | -0.07 |
| ATOM | 2990 | CE1  | TYR | 306 | 2.600  | 7.503  | -10.282 | 1.00 | -0.04 |
| ATOM | 2991 | CE2  | TYR | 306 | 3.517  | 6.279  | -8.417  | 1.00 | -0.04 |
| ATOM | 2992 | CZ   | TYR | 306 | 3.702  | 6.922  | -9.642  | 1.00 | 0.08  |
| ATOM | 2993 | OH   | TYR | 306 | 4.984  | 6.972  | -10.197 | 1.00 | -0.34 |
| ATOM | 2994 | H    | TYR | 306 | -0.023 | 9.440  | -8.251  | 1.00 | 0.19  |
| ATOM | 2995 | HA   | TYR | 306 | -1.679 | 7.303  | -9.214  | 1.00 | 0.08  |
| ATOM | 2996 | HB1  | TYR | 306 | -0.535 | 5.794  | -7.664  | 1.00 | 0.05  |
| ATOM | 2997 | HB2  | TYR | 306 | 0.009  | 7.152  | -6.652  | 1.00 | 0.05  |
| ATOM | 2998 | HD1  | TYR | 306 | 0.494  | 7.874  | -10.236 | 1.00 | 0.05  |
| ATOM | 2999 | HD2  | TYR | 306 | 2.136  | 5.776  | -6.851  | 1.00 | 0.05  |
| ATOM | 3000 | HE1  | TYR | 306 | 2.720  | 7.998  | -11.240 | 1.00 | 0.05  |
| ATOM | 3001 | HE2  | TYR | 306 | 4.361  | 5.794  | -7.939  | 1.00 | 0.05  |
| ATOM | 3002 | HH   | TYR | 306 | 5.017  | 7.350  | -11.069 | 1.00 | 0.25  |
| ATOM | 3003 | N    | GLN | 307 | -2.537 | 8.576  | -6.277  | 1.00 | -0.26 |
| ATOM | 3004 | CA   | GLN | 307 | -3.678 | 8.591  | -5.363  | 1.00 | 0.13  |
| ATOM | 3005 | C    | GLN | 307 | -4.983 | 8.707  | -6.123  | 1.00 | 0.20  |
| ATOM | 3006 | O    | GLN | 307 | -5.994 | 8.303  | -5.575  | 1.00 | -0.39 |
| ATOM | 3007 | CB   | GLN | 307 | -3.574 | 9.670  | -4.248  | 1.00 | 0.00  |
| ATOM | 3008 | CG   | GLN | 307 | -4.616 | 9.531  | -3.099  | 1.00 | 0.04  |
| ATOM | 3009 | CD   | GLN | 307 | -4.527 | 8.240  | -2.317  | 1.00 | 0.17  |
| ATOM | 3010 | OE1  | GLN | 307 | -5.502 | 7.510  | -2.267  | 1.00 | -0.40 |
| ATOM | 3011 | NE2  | GLN | 307 | -3.396 | 7.904  | -1.667  | 1.00 | -0.30 |
| ATOM | 3012 | H    | GLN | 307 | -1.804 | 9.252  | -6.158  | 1.00 | 0.19  |
| ATOM | 3013 | HA   | GLN | 307 | -3.657 | 7.623  | -4.855  | 1.00 | 0.08  |
| ATOM | 3014 | HB2  | GLN | 307 | -3.707 | 10.662 | -4.702  | 1.00 | 0.03  |
| ATOM | 3015 | HB1  | GLN | 307 | -2.566 | 9.620  | -3.811  | 1.00 | 0.03  |
| ATOM | 3016 | HG2  | GLN | 307 | -5.635 | 9.640  | -3.503  | 1.00 | 0.05  |
| ATOM | 3017 | HG1  | GLN | 307 | -4.466 | 10.349 | -2.376  | 1.00 | 0.05  |
| ATOM | 3018 | HE21 | GLN | 307 | -2.591 | 8.495  | -1.661  | 1.00 | 0.18  |
| ATOM | 3019 | HE22 | GLN | 307 | -3.378 | 7.046  | -1.151  | 1.00 | 0.18  |
| ATOM | 3020 | N    | VAL | 308 | -5.036 | 9.218  | -7.374  | 1.00 | -0.26 |
| ATOM | 3021 | CA   | VAL | 308 | -6.295 | 9.160  | -8.125  | 1.00 | 0.13  |
| ATOM | 3022 | C    | VAL | 308 | -6.646 | 7.704  | -8.356  | 1.00 | 0.20  |
| ATOM | 3023 | O    | VAL | 308 | -7.737 | 7.269  | -8.017  | 1.00 | -0.39 |
| ATOM | 3024 | CB   | VAL | 308 | -6.202 | 9.930  | -9.481  | 1.00 | -0.01 |
| ATOM | 3025 | CG1  | VAL | 308 | -7.443 | 9.687  | -10.387 | 1.00 | -0.06 |

|      |      |         |     |         |        |         |      |       |
|------|------|---------|-----|---------|--------|---------|------|-------|
| ATOM | 3026 | CG2 VAL | 308 | -5.998  | 11.452 | -9.234  | 1.00 | -0.06 |
| ATOM | 3027 | H VAL   | 308 | -4.213  | 9.567  | -7.827  | 1.00 | 0.19  |
| ATOM | 3028 | HA VAL  | 308 | -7.101  | 9.607  | -7.521  | 1.00 | 0.08  |
| ATOM | 3029 | HB VAL  | 308 | -5.335  | 9.553  | -10.047 | 1.00 | 0.03  |
| ATOM | 3030 | HG13VAL | 308 | -7.552  | 8.620  | -10.637 | 1.00 | 0.02  |
| ATOM | 3031 | HG12VAL | 308 | -7.339  | 10.243 | -11.332 | 1.00 | 0.02  |
| ATOM | 3032 | HG11VAL | 308 | -8.364  | 10.020 | -9.893  | 1.00 | 0.02  |
| ATOM | 3033 | HG23VAL | 308 | -6.862  | 11.874 | -8.699  | 1.00 | 0.02  |
| ATOM | 3034 | HG22VAL | 308 | -5.882  | 11.983 | -10.191 | 1.00 | 0.02  |
| ATOM | 3035 | HG21VAL | 308 | -5.096  | 11.646 | -8.633  | 1.00 | 0.02  |
| ATOM | 3036 | N THR   | 309 | -5.723  | 6.908  | -8.937  | 1.00 | -0.26 |
| ATOM | 3037 | CA THR  | 309 | -6.028  | 5.495  | -9.161  | 1.00 | 0.16  |
| ATOM | 3038 | C THR   | 309 | -6.283  | 4.818  | -7.835  | 1.00 | 0.21  |
| ATOM | 3039 | O THR   | 309 | -7.208  | 4.028  | -7.716  | 1.00 | -0.39 |
| ATOM | 3040 | CB THR  | 309 | -4.854  | 4.784  | -9.887  | 1.00 | 0.09  |
| ATOM | 3041 | OG1 THR | 309 | -4.556  | 5.542  | -11.074 | 1.00 | -0.39 |
| ATOM | 3042 | CG2 THR | 309 | -5.219  | 3.322  | -10.262 | 1.00 | -0.03 |
| ATOM | 3043 | H THR   | 309 | -4.817  | 7.256  | -9.191  | 1.00 | 0.19  |
| ATOM | 3044 | HA THR  | 309 | -6.931  | 5.426  | -9.788  | 1.00 | 0.08  |
| ATOM | 3045 | HB THR  | 309 | -3.971  | 4.785  | -9.221  | 1.00 | 0.06  |
| ATOM | 3046 | HG1 THR | 309 | -3.825  | 5.190  | -11.573 | 1.00 | 0.21  |
| ATOM | 3047 | HG22THR | 309 | -4.369  | 2.838  | -10.767 | 1.00 | 0.03  |
| ATOM | 3048 | HG21THR | 309 | -6.083  | 3.313  | -10.943 | 1.00 | 0.03  |
| ATOM | 3049 | HG23THR | 309 | -5.469  | 2.733  | -9.366  | 1.00 | 0.03  |
| ATOM | 3050 | N ARG   | 310 | -5.464  | 5.116  | -6.805  | 1.00 | -0.26 |
| ATOM | 3051 | CA ARG  | 310 | -5.736  | 4.523  | -5.497  | 1.00 | 0.13  |
| ATOM | 3052 | C ARG   | 310 | -7.117  | 4.957  | -5.046  | 1.00 | 0.20  |
| ATOM | 3053 | O ARG   | 310 | -7.860  | 4.152  | -4.512  | 1.00 | -0.39 |
| ATOM | 3054 | CB ARG  | 310 | -4.702  | 4.979  | -4.433  | 1.00 | -0.01 |
| ATOM | 3055 | CG ARG  | 310 | -4.619  | 4.053  | -3.186  | 1.00 | -0.02 |
| ATOM | 3056 | CD ARG  | 310 | -3.499  | 2.979  | -3.319  | 1.00 | 0.06  |
| ATOM | 3057 | NE ARG  | 310 | -2.159  | 3.587  | -3.275  | 1.00 | -0.27 |
| ATOM | 3058 | CZ ARG  | 310 | -1.033  | 2.907  | -3.304  | 1.00 | 0.29  |
| ATOM | 3059 | NH1 ARG | 310 | -0.990  | 1.604  | -3.394  | 1.00 | -0.28 |
| ATOM | 3060 | NH2 ARG | 310 | 0.101   | 3.556  | -3.218  | 1.00 | -0.28 |
| ATOM | 3061 | H ARG   | 310 | -4.709  | 5.773  | -6.919  | 1.00 | 0.19  |
| ATOM | 3062 | HA ARG  | 310 | -5.695  | 3.429  | -5.602  | 1.00 | 0.08  |
| ATOM | 3063 | HB2 ARG | 310 | -5.016  | 5.978  | -4.107  | 1.00 | 0.03  |
| ATOM | 3064 | HB1 ARG | 310 | -3.707  | 5.065  | -4.895  | 1.00 | 0.03  |
| ATOM | 3065 | HG2 ARG | 310 | -5.600  | 3.584  | -3.000  | 1.00 | 0.03  |
| ATOM | 3066 | HG1 ARG | 310 | -4.376  | 4.668  | -2.304  | 1.00 | 0.03  |
| ATOM | 3067 | HD2 ARG | 310 | -3.655  | 2.422  | -4.255  | 1.00 | 0.07  |
| ATOM | 3068 | HD1 ARG | 310 | -3.626  | 2.288  | -2.470  | 1.00 | 0.07  |
| ATOM | 3069 | HE ARG  | 310 | -2.110  | 4.612  | -3.178  | 1.00 | 0.26  |
| ATOM | 3070 | HH11ARG | 310 | -1.841  | 1.030  | -3.429  | 1.00 | 0.26  |
| ATOM | 3071 | HH12ARG | 310 | -0.099  | 1.091  | -3.318  | 1.00 | 0.26  |
| ATOM | 3072 | HH21ARG | 310 | 0.131   | 4.576  | -3.112  | 1.00 | 0.26  |
| ATOM | 3073 | HH22ARG | 310 | 1.003   | 3.055  | -3.223  | 1.00 | 0.26  |
| ATOM | 3074 | N GLY   | 311 | -7.477  | 6.243  | -5.256  | 1.00 | -0.27 |
| ATOM | 3075 | CA GLY  | 311 | -8.789  | 6.736  | -4.848  | 1.00 | 0.12  |
| ATOM | 3076 | C GLY   | 311 | -9.889  | 5.973  | -5.540  | 1.00 | 0.20  |
| ATOM | 3077 | O GLY   | 311 | -10.911 | 5.717  | -4.925  | 1.00 | -0.39 |
| ATOM | 3078 | H GLY   | 311 | -6.857  | 6.892  | -5.699  | 1.00 | 0.19  |
| ATOM | 3079 | HA1 GLY | 311 | -8.891  | 6.633  | -3.759  | 1.00 | 0.08  |
| ATOM | 3080 | HA2 GLY | 311 | -8.907  | 7.800  | -5.105  | 1.00 | 0.08  |
| ATOM | 3081 | N LEU   | 312 | -9.719  | 5.585  | -6.822  | 1.00 | -0.26 |
| ATOM | 3082 | CA LEU  | 312 | -10.685 | 4.650  | -7.398  | 1.00 | 0.13  |
| ATOM | 3083 | C LEU   | 312 | -10.586 | 3.353  | -6.621  | 1.00 | 0.20  |

|      |      |      |     |     |         |        |         |      |       |
|------|------|------|-----|-----|---------|--------|---------|------|-------|
| ATOM | 3084 | O    | LEU | 312 | -11.601 | 2.850  | -6.164  | 1.00 | -0.39 |
| ATOM | 3085 | CB   | LEU | 312 | -10.446 | 4.362  | -8.907  | 1.00 | -0.01 |
| ATOM | 3086 | CG   | LEU | 312 | -10.692 | 5.586  | -9.840  | 1.00 | -0.04 |
| ATOM | 3087 | CD1  | LEU | 312 | -10.143 | 5.284  | -11.264 | 1.00 | -0.06 |
| ATOM | 3088 | CD2  | LEU | 312 | -12.203 | 5.948  | -9.944  | 1.00 | -0.06 |
| ATOM | 3089 | H    | LEU | 312 | -8.900  | 5.858  | -7.341  | 1.00 | 0.19  |
| ATOM | 3090 | HA   | LEU | 312 | -11.706 | 5.033  | -7.250  | 1.00 | 0.08  |
| ATOM | 3091 | HB2  | LEU | 312 | -11.104 | 3.536  | -9.225  | 1.00 | 0.03  |
| ATOM | 3092 | HB1  | LEU | 312 | -9.408  | 4.018  | -9.027  | 1.00 | 0.03  |
| ATOM | 3093 | HG   | LEU | 312 | -10.137 | 6.454  | -9.446  | 1.00 | 0.03  |
| ATOM | 3094 | HD13 | LEU | 312 | -9.066  | 5.059  | -11.230 | 1.00 | 0.02  |
| ATOM | 3095 | HD12 | LEU | 312 | -10.286 | 6.152  | -11.927 | 1.00 | 0.02  |
| ATOM | 3096 | HD11 | LEU | 312 | -10.667 | 4.420  | -11.701 | 1.00 | 0.02  |
| ATOM | 3097 | HD23 | LEU | 312 | -12.784 | 5.076  | -10.280 | 1.00 | 0.02  |
| ATOM | 3098 | HD22 | LEU | 312 | -12.352 | 6.758  | -10.675 | 1.00 | 0.02  |
| ATOM | 3099 | HD21 | LEU | 312 | -12.612 | 6.289  | -8.984  | 1.00 | 0.02  |
| ATOM | 3100 | N    | ALA | 313 | -9.371  | 2.785  | -6.444  | 1.00 | -0.26 |
| ATOM | 3101 | CA   | ALA | 313 | -9.277  | 1.522  | -5.711  | 1.00 | 0.13  |
| ATOM | 3102 | C    | ALA | 313 | -9.906  | 1.629  | -4.339  | 1.00 | 0.20  |
| ATOM | 3103 | O    | ALA | 313 | -10.426 | 0.638  | -3.851  | 1.00 | -0.39 |
| ATOM | 3104 | CB   | ALA | 313 | -7.818  | 1.023  | -5.558  | 1.00 | -0.02 |
| ATOM | 3105 | H    | ALA | 313 | -8.534  | 3.220  | -6.795  | 1.00 | 0.19  |
| ATOM | 3106 | HA   | ALA | 313 | -9.838  | 0.766  | -6.284  | 1.00 | 0.08  |
| ATOM | 3107 | HB3  | ALA | 313 | -7.250  | 1.694  | -4.899  | 1.00 | 0.03  |
| ATOM | 3108 | HB2  | ALA | 313 | -7.330  | 0.986  | -6.544  | 1.00 | 0.03  |
| ATOM | 3109 | HB1  | ALA | 313 | -7.804  | 0.013  | -5.118  | 1.00 | 0.03  |
| ATOM | 3110 | N    | SER | 314 | -9.897  | 2.807  | -3.679  | 1.00 | -0.26 |
| ATOM | 3111 | CA   | SER | 314 | -10.606 | 2.926  | -2.408  | 1.00 | 0.15  |
| ATOM | 3112 | C    | SER | 314 | -12.026 | 2.415  | -2.518  | 1.00 | 0.21  |
| ATOM | 3113 | O    | SER | 314 | -12.509 | 1.831  | -1.561  | 1.00 | -0.39 |
| ATOM | 3114 | CB   | SER | 314 | -10.664 | 4.389  | -1.904  | 1.00 | 0.08  |
| ATOM | 3115 | OG   | SER | 314 | -9.356  | 4.988  | -1.881  | 1.00 | -0.39 |
| ATOM | 3116 | H    | SER | 314 | -9.405  | 3.606  | -4.039  | 1.00 | 0.19  |
| ATOM | 3117 | HA   | SER | 314 | -10.064 | 2.332  | -1.659  | 1.00 | 0.08  |
| ATOM | 3118 | HB2  | SER | 314 | -11.123 | 4.434  | -0.901  | 1.00 | 0.06  |
| ATOM | 3119 | HB1  | SER | 314 | -11.296 | 4.969  | -2.592  | 1.00 | 0.06  |
| ATOM | 3120 | HG   | SER | 314 | -8.738  | 4.535  | -1.313  | 1.00 | 0.21  |
| ATOM | 3121 | N    | LEU | 315 | -12.722 | 2.601  | -3.663  | 1.00 | -0.26 |
| ATOM | 3122 | CA   | LEU | 315 | -14.063 | 2.025  | -3.789  | 1.00 | 0.13  |
| ATOM | 3123 | C    | LEU | 315 | -13.947 | 0.521  | -3.645  | 1.00 | 0.20  |
| ATOM | 3124 | O    | LEU | 315 | -14.673 | -0.086 | -2.870  | 1.00 | -0.39 |
| ATOM | 3125 | CB   | LEU | 315 | -14.717 | 2.335  | -5.168  | 1.00 | -0.01 |
| ATOM | 3126 | CG   | LEU | 315 | -15.030 | 3.844  | -5.409  | 1.00 | -0.04 |
| ATOM | 3127 | CD1  | LEU | 315 | -15.270 | 4.105  | -6.923  | 1.00 | -0.06 |
| ATOM | 3128 | CD2  | LEU | 315 | -16.276 | 4.304  | -4.601  | 1.00 | -0.06 |
| ATOM | 3129 | H    | LEU | 315 | -12.300 | 3.056  | -4.456  | 1.00 | 0.19  |
| ATOM | 3130 | HA   | LEU | 315 | -14.700 | 2.400  | -2.974  | 1.00 | 0.08  |
| ATOM | 3131 | HB2  | LEU | 315 | -15.650 | 1.756  | -5.266  | 1.00 | 0.03  |
| ATOM | 3132 | HB1  | LEU | 315 | -14.034 | 1.980  | -5.954  | 1.00 | 0.03  |
| ATOM | 3133 | HG   | LEU | 315 | -14.166 | 4.459  | -5.105  | 1.00 | 0.03  |
| ATOM | 3134 | HD13 | LEU | 315 | -14.376 | 3.841  | -7.510  | 1.00 | 0.02  |
| ATOM | 3135 | HD12 | LEU | 315 | -15.491 | 5.169  | -7.105  | 1.00 | 0.02  |
| ATOM | 3136 | HD11 | LEU | 315 | -16.118 | 3.503  | -7.285  | 1.00 | 0.02  |
| ATOM | 3137 | HD23 | LEU | 315 | -17.149 | 3.681  | -4.849  | 1.00 | 0.02  |
| ATOM | 3138 | HD22 | LEU | 315 | -16.526 | 5.349  | -4.840  | 1.00 | 0.02  |
| ATOM | 3139 | HD21 | LEU | 315 | -16.091 | 4.237  | -3.520  | 1.00 | 0.02  |
| ATOM | 3140 | N    | ASN | 316 | -13.009 | -0.090 | -4.403  | 1.00 | -0.26 |
| ATOM | 3141 | CA   | ASN | 316 | -12.804 | -1.532 | -4.301  | 1.00 | 0.15  |

|      |      |      |     |     |         |        |        |      |       |
|------|------|------|-----|-----|---------|--------|--------|------|-------|
| ATOM | 3142 | C    | ASN | 316 | -12.367 | -1.904 | -2.906 | 1.00 | 0.21  |
| ATOM | 3143 | O    | ASN | 316 | -12.764 | -2.947 | -2.415 | 1.00 | -0.39 |
| ATOM | 3144 | CB   | ASN | 316 | -11.708 | -2.011 | -5.286 | 1.00 | 0.08  |
| ATOM | 3145 | CG   | ASN | 316 | -12.140 | -1.729 | -6.701 | 1.00 | 0.18  |
| ATOM | 3146 | OD1  | ASN | 316 | -11.610 | -0.815 | -7.308 | 1.00 | -0.40 |
| ATOM | 3147 | ND2  | ASN | 316 | -13.106 | -2.477 | -7.269 | 1.00 | -0.30 |
| ATOM | 3148 | H    | ASN | 316 | -12.401 | 0.440  | -5.002 | 1.00 | 0.19  |
| ATOM | 3149 | HA   | ASN | 316 | -13.752 | -2.047 | -4.523 | 1.00 | 0.08  |
| ATOM | 3150 | HB2  | ASN | 316 | -11.530 | -3.085 | -5.170 | 1.00 | 0.06  |
| ATOM | 3151 | HB1  | ASN | 316 | -10.754 | -1.503 | -5.081 | 1.00 | 0.06  |
| ATOM | 3152 | HD21 | ASN | 316 | -13.553 | -3.231 | -6.788 | 1.00 | 0.18  |
| ATOM | 3153 | HD22 | ASN | 316 | -13.377 | -2.267 | -8.209 | 1.00 | 0.18  |
| ATOM | 3154 | N    | SER | 317 | -11.545 | -1.075 | -2.231 | 1.00 | -0.26 |
| ATOM | 3155 | CA   | SER | 317 | -11.124 | -1.418 | -0.875 | 1.00 | 0.15  |
| ATOM | 3156 | C    | SER | 317 | -12.091 | -0.952 | 0.188  | 1.00 | 0.21  |
| ATOM | 3157 | O    | SER | 317 | -11.667 | -0.860 | 1.329  | 1.00 | -0.39 |
| ATOM | 3158 | CB   | SER | 317 | -9.733  | -0.809 | -0.565 | 1.00 | 0.08  |
| ATOM | 3159 | OG   | SER | 317 | -9.156  | -1.431 | 0.598  | 1.00 | -0.39 |
| ATOM | 3160 | H    | SER | 317 | -11.239 | -0.208 | -2.633 | 1.00 | 0.19  |
| ATOM | 3161 | HA   | SER | 317 | -11.013 | -2.508 | -0.767 | 1.00 | 0.08  |
| ATOM | 3162 | HB2  | SER | 317 | -9.832  | 0.277  | -0.418 | 1.00 | 0.06  |
| ATOM | 3163 | HB1  | SER | 317 | -9.068  | -0.976 | -1.424 | 1.00 | 0.06  |
| ATOM | 3164 | HG   | SER | 317 | -9.703  | -1.272 | 1.368  | 1.00 | 0.21  |
| ATOM | 3165 | N    | CYS | 318 | -13.371 | -0.639 | -0.112 | 1.00 | -0.26 |
| ATOM | 3166 | CA   | CYS | 318 | -14.267 | -0.178 | 0.950  | 1.00 | 0.14  |
| ATOM | 3167 | C    | CYS | 318 | -15.724 | -0.328 | 0.562  | 1.00 | 0.20  |
| ATOM | 3168 | O    | CYS | 318 | -16.460 | -1.016 | 1.249  | 1.00 | -0.39 |
| ATOM | 3169 | CB   | CYS | 318 | -13.946 | 1.300  | 1.296  | 1.00 | 0.03  |
| ATOM | 3170 | SG   | CYS | 318 | -15.030 | 1.870  | 2.648  | 1.00 | -0.17 |
| ATOM | 3171 | H    | CYS | 318 | -13.704 | -0.670 | -1.056 | 1.00 | 0.19  |
| ATOM | 3172 | HA   | CYS | 318 | -14.114 | -0.788 | 1.857  | 1.00 | 0.08  |
| ATOM | 3173 | HB2  | CYS | 318 | -14.102 | 1.947  | 0.421  | 1.00 | 0.04  |
| ATOM | 3174 | HB1  | CYS | 318 | -12.897 | 1.394  | 1.616  | 1.00 | 0.04  |
| ATOM | 3175 | LPG2 | CYS | 318 | -14.296 | 1.015  | 3.323  | 1.00 | 0.00  |
| ATOM | 3176 | LPG1 | CYS | 318 | -15.170 | 1.355  | 2.732  | 1.00 | 0.00  |
| ATOM | 3177 | HG   | CYS | 318 | -14.669 | 2.805  | 2.756  | 1.00 | 0.10  |
| ATOM | 3178 | N    | VAL | 319 | -16.190 | 0.295  | -0.542 | 1.00 | -0.26 |
| ATOM | 3179 | CA   | VAL | 319 | -17.602 | 0.154  | -0.895 | 1.00 | 0.13  |
| ATOM | 3180 | C    | VAL | 319 | -17.879 | -1.301 | -1.200 | 1.00 | 0.20  |
| ATOM | 3181 | O    | VAL | 319 | -18.863 | -1.830 | -0.708 | 1.00 | -0.39 |
| ATOM | 3182 | CB   | VAL | 319 | -18.009 | 1.087  | -2.075 | 1.00 | -0.01 |
| ATOM | 3183 | CG1  | VAL | 319 | -19.442 | 0.761  | -2.583 | 1.00 | -0.06 |
| ATOM | 3184 | CG2  | VAL | 319 | -17.936 | 2.577  | -1.633 | 1.00 | -0.06 |
| ATOM | 3185 | H    | VAL | 319 | -15.578 | 0.797  | -1.155 | 1.00 | 0.19  |
| ATOM | 3186 | HA   | VAL | 319 | -18.216 | 0.431  | -0.023 | 1.00 | 0.08  |
| ATOM | 3187 | HB   | VAL | 319 | -17.312 | 0.928  | -2.916 | 1.00 | 0.03  |
| ATOM | 3188 | HG13 | VAL | 319 | -19.485 | -0.259 | -2.993 | 1.00 | 0.02  |
| ATOM | 3189 | HG12 | VAL | 319 | -19.736 | 1.457  | -3.384 | 1.00 | 0.02  |
| ATOM | 3190 | HG11 | VAL | 319 | -20.169 | 0.845  | -1.761 | 1.00 | 0.02  |
| ATOM | 3191 | HG23 | VAL | 319 | -18.627 | 2.766  | -0.797 | 1.00 | 0.02  |
| ATOM | 3192 | HG22 | VAL | 319 | -18.220 | 3.238  | -2.465 | 1.00 | 0.02  |
| ATOM | 3193 | HG21 | VAL | 319 | -16.920 | 2.848  | -1.309 | 1.00 | 0.02  |
| ATOM | 3194 | N    | ASP | 320 | -17.019 | -1.963 | -2.004 | 1.00 | -0.26 |
| ATOM | 3195 | CA   | ASP | 320 | -17.228 | -3.388 | -2.296 | 1.00 | 0.14  |
| ATOM | 3196 | C    | ASP | 320 | -17.368 | -4.169 | -0.989 | 1.00 | 0.21  |
| ATOM | 3197 | O    | ASP | 320 | -18.456 | -4.671 | -0.739 | 1.00 | -0.39 |
| ATOM | 3198 | CB   | ASP | 320 | -16.196 | -3.821 | -3.380 | 1.00 | 0.03  |
| ATOM | 3199 | CG   | ASP | 320 | -16.182 | -5.286 | -3.693 | 1.00 | 0.03  |

|      |      |      |     |     |         |        |        |      |       |
|------|------|------|-----|-----|---------|--------|--------|------|-------|
| ATOM | 3200 | OD1  | ASP | 320 | -17.018 | -5.715 | -4.532 | 1.00 | -0.57 |
| ATOM | 3201 | OD2  | ASP | 320 | -15.322 | -6.007 | -3.125 | 1.00 | -0.57 |
| ATOM | 3202 | H    | ASP | 320 | -16.225 | -1.480 | -2.389 | 1.00 | 0.19  |
| ATOM | 3203 | HA   | ASP | 320 | -18.210 | -3.493 | -2.791 | 1.00 | 0.08  |
| ATOM | 3204 | HB2  | ASP | 320 | -15.177 | -3.523 | -3.113 | 1.00 | 0.05  |
| ATOM | 3205 | HB1  | ASP | 320 | -16.427 | -3.293 | -4.319 | 1.00 | 0.05  |
| ATOM | 3206 | N    | PRO | 321 | -16.374 | -4.287 | -0.070 | 1.00 | -0.25 |
| ATOM | 3207 | CA   | PRO | 321 | -16.666 | -4.815 | 1.256  | 1.00 | 0.13  |
| ATOM | 3208 | C    | PRO | 321 | -17.926 | -4.310 | 1.928  | 1.00 | 0.20  |
| ATOM | 3209 | O    | PRO | 321 | -18.690 | -5.130 | 2.413  | 1.00 | -0.39 |
| ATOM | 3210 | CB   | PRO | 321 | -15.408 | -4.329 | 2.020  | 1.00 | -0.01 |
| ATOM | 3211 | CG   | PRO | 321 | -14.296 | -4.385 | 0.951  | 1.00 | -0.03 |
| ATOM | 3212 | CD   | PRO | 321 | -14.995 | -3.919 | -0.349 | 1.00 | 0.04  |
| ATOM | 3213 | HA   | PRO | 321 | -16.677 | -5.915 | 1.204  | 1.00 | 0.08  |
| ATOM | 3214 | HB2  | PRO | 321 | -15.183 | -4.941 | 2.907  | 1.00 | 0.03  |
| ATOM | 3215 | HB1  | PRO | 321 | -15.522 | -3.281 | 2.340  | 1.00 | 0.03  |
| ATOM | 3216 | HG1  | PRO | 321 | -13.420 | -3.765 | 1.200  | 1.00 | 0.03  |
| ATOM | 3217 | HG2  | PRO | 321 | -13.976 | -5.437 | 0.852  | 1.00 | 0.03  |
| ATOM | 3218 | HD1  | PRO | 321 | -14.904 | -2.836 | -0.506 | 1.00 | 0.05  |
| ATOM | 3219 | HD2  | PRO | 321 | -14.560 | -4.482 | -1.187 | 1.00 | 0.05  |
| ATOM | 3220 | N    | ILE | 322 | -18.188 | -2.984 | 2.004  | 1.00 | -0.26 |
| ATOM | 3221 | CA   | ILE | 322 | -19.360 | -2.535 | 2.762  | 1.00 | 0.13  |
| ATOM | 3222 | C    | ILE | 322 | -20.615 | -3.102 | 2.139  | 1.00 | 0.20  |
| ATOM | 3223 | O    | ILE | 322 | -21.479 | -3.566 | 2.869  | 1.00 | -0.39 |
| ATOM | 3224 | CB   | ILE | 322 | -19.473 | -0.986 | 2.924  | 1.00 | 0.00  |
| ATOM | 3225 | CG1  | ILE | 322 | -18.345 | -0.462 | 3.867  | 1.00 | -0.05 |
| ATOM | 3226 | CG2  | ILE | 322 | -20.876 | -0.575 | 3.465  | 1.00 | -0.06 |
| ATOM | 3227 | CD1  | ILE | 322 | -18.193 | 1.083  | 3.851  | 1.00 | -0.06 |
| ATOM | 3228 | H    | ILE | 322 | -17.602 | -2.309 | 1.542  | 1.00 | 0.19  |
| ATOM | 3229 | HA   | ILE | 322 | -19.278 | -2.952 | 3.777  | 1.00 | 0.08  |
| ATOM | 3230 | HB   | ILE | 322 | -19.355 | -0.544 | 1.922  | 1.00 | 0.03  |
| ATOM | 3231 | HG12 | ILE | 322 | -17.378 | -0.893 | 3.565  | 1.00 | 0.03  |
| ATOM | 3232 | HG11 | ILE | 322 | -18.540 | -0.794 | 4.900  | 1.00 | 0.03  |
| ATOM | 3233 | HG23 | ILE | 322 | -21.677 | -0.880 | 2.775  | 1.00 | 0.02  |
| ATOM | 3234 | HG22 | ILE | 322 | -20.965 | 0.513  | 3.582  | 1.00 | 0.02  |
| ATOM | 3235 | HG21 | ILE | 322 | -21.061 | -1.047 | 4.443  | 1.00 | 0.02  |
| ATOM | 3236 | HD13 | ILE | 322 | -18.090 | 1.453  | 2.820  | 1.00 | 0.02  |
| ATOM | 3237 | HD12 | ILE | 322 | -17.292 | 1.372  | 4.413  | 1.00 | 0.02  |
| ATOM | 3238 | HD11 | ILE | 322 | -19.049 | 1.580  | 4.326  | 1.00 | 0.02  |
| ATOM | 3239 | N    | LEU | 323 | -20.752 | -3.084 | 0.796  | 1.00 | -0.26 |
| ATOM | 3240 | CA   | LEU | 323 | -21.964 | -3.642 | 0.195  | 1.00 | 0.13  |
| ATOM | 3241 | C    | LEU | 323 | -22.143 | -5.071 | 0.655  | 1.00 | 0.20  |
| ATOM | 3242 | O    | LEU | 323 | -23.239 | -5.465 | 1.029  | 1.00 | -0.39 |
| ATOM | 3243 | CB   | LEU | 323 | -21.926 | -3.627 | -1.359 | 1.00 | -0.01 |
| ATOM | 3244 | CG   | LEU | 323 | -22.002 | -2.205 | -1.996 | 1.00 | -0.04 |
| ATOM | 3245 | CD1  | LEU | 323 | -21.688 | -2.300 | -3.516 | 1.00 | -0.06 |
| ATOM | 3246 | CD2  | LEU | 323 | -23.388 | -1.529 | -1.793 | 1.00 | -0.06 |
| ATOM | 3247 | H    | LEU | 323 | -20.015 | -2.727 | 0.209  | 1.00 | 0.19  |
| ATOM | 3248 | HA   | LEU | 323 | -22.837 | -3.086 | 0.563  | 1.00 | 0.08  |
| ATOM | 3249 | HB2  | LEU | 323 | -22.766 | -4.226 | -1.748 | 1.00 | 0.03  |
| ATOM | 3250 | HB1  | LEU | 323 | -20.992 | -4.124 | -1.670 | 1.00 | 0.03  |
| ATOM | 3251 | HG   | LEU | 323 | -21.242 | -1.555 | -1.535 | 1.00 | 0.03  |
| ATOM | 3252 | HD13 | LEU | 323 | -20.682 | -2.718 | -3.679 | 1.00 | 0.02  |
| ATOM | 3253 | HD12 | LEU | 323 | -21.722 | -1.304 | -3.986 | 1.00 | 0.02  |
| ATOM | 3254 | HD11 | LEU | 323 | -22.422 | -2.948 | -4.019 | 1.00 | 0.02  |
| ATOM | 3255 | HD23 | LEU | 323 | -24.191 | -2.173 | -2.182 | 1.00 | 0.02  |
| ATOM | 3256 | HD22 | LEU | 323 | -23.424 | -0.568 | -2.330 | 1.00 | 0.02  |
| ATOM | 3257 | HD21 | LEU | 323 | -23.588 | -1.316 | -0.733 | 1.00 | 0.02  |

|      |      |      |     |     |         |        |        |      |       |
|------|------|------|-----|-----|---------|--------|--------|------|-------|
| ATOM | 3258 | N    | TYR | 324 | -21.073 | -5.890 | 0.644  | 1.00 | -0.26 |
| ATOM | 3259 | CA   | TYR | 324 | -21.246 | -7.259 | 1.120  | 1.00 | 0.14  |
| ATOM | 3260 | C    | TYR | 324 | -21.419 | -7.295 | 2.619  | 1.00 | 0.21  |
| ATOM | 3261 | O    | TYR | 324 | -22.128 | -8.159 | 3.116  | 1.00 | -0.39 |
| ATOM | 3262 | CB   | TYR | 324 | -20.058 | -8.156 | 0.716  | 1.00 | 0.02  |
| ATOM | 3263 | CG   | TYR | 324 | -19.757 | -8.010 | -0.784 | 1.00 | -0.05 |
| ATOM | 3264 | CD1  | TYR | 324 | -20.744 | -8.139 | -1.770 | 1.00 | -0.07 |
| ATOM | 3265 | CD2  | TYR | 324 | -18.449 | -7.728 | -1.182 | 1.00 | -0.07 |
| ATOM | 3266 | CE1  | TYR | 324 | -20.422 | -7.978 | -3.122 | 1.00 | -0.04 |
| ATOM | 3267 | CE2  | TYR | 324 | -18.101 | -7.717 | -2.533 | 1.00 | -0.04 |
| ATOM | 3268 | CZ   | TYR | 324 | -19.103 | -7.730 | -3.506 | 1.00 | 0.08  |
| ATOM | 3269 | OH   | TYR | 324 | -18.804 | -7.489 | -4.847 | 1.00 | -0.34 |
| ATOM | 3270 | H    | TYR | 324 | -20.163 | -5.566 | 0.355  | 1.00 | 0.19  |
| ATOM | 3271 | HA   | TYR | 324 | -22.162 | -7.677 | 0.680  | 1.00 | 0.08  |
| ATOM | 3272 | HB1  | TYR | 324 | -20.277 | -9.208 | 0.953  | 1.00 | 0.05  |
| ATOM | 3273 | HB2  | TYR | 324 | -19.191 | -7.850 | 1.322  | 1.00 | 0.05  |
| ATOM | 3274 | HD1  | TYR | 324 | -21.771 | -8.359 | -1.510 | 1.00 | 0.05  |
| ATOM | 3275 | HD2  | TYR | 324 | -17.696 | -7.506 | -0.441 | 1.00 | 0.05  |
| ATOM | 3276 | HE1  | TYR | 324 | -21.194 | -8.042 | -3.880 | 1.00 | 0.05  |
| ATOM | 3277 | HE2  | TYR | 324 | -17.057 | -7.696 | -2.819 | 1.00 | 0.05  |
| ATOM | 3278 | HH   | TYR | 324 | -18.073 | -6.869 | -4.915 | 1.00 | 0.25  |
| ATOM | 3279 | N    | PHE | 325 | -20.786 | -6.375 | 3.380  | 1.00 | -0.26 |
| ATOM | 3280 | CA   | PHE | 325 | -21.015 | -6.385 | 4.818  | 1.00 | 0.14  |
| ATOM | 3281 | C    | PHE | 325 | -22.502 | -6.178 | 5.032  | 1.00 | 0.21  |
| ATOM | 3282 | O    | PHE | 325 | -23.118 | -6.930 | 5.778  | 1.00 | -0.39 |
| ATOM | 3283 | CB   | PHE | 325 | -20.215 | -5.338 | 5.635  | 1.00 | 0.02  |
| ATOM | 3284 | CG   | PHE | 325 | -18.683 | -5.502 | 5.614  | 1.00 | -0.04 |
| ATOM | 3285 | CD1  | PHE | 325 | -18.008 | -6.449 | 4.831  | 1.00 | -0.06 |
| ATOM | 3286 | CD2  | PHE | 325 | -17.928 | -4.652 | 6.431  | 1.00 | -0.06 |
| ATOM | 3287 | CE1  | PHE | 325 | -16.613 | -6.518 | 4.844  | 1.00 | -0.07 |
| ATOM | 3288 | CE2  | PHE | 325 | -16.536 | -4.762 | 6.494  | 1.00 | -0.07 |
| ATOM | 3289 | CZ   | PHE | 325 | -15.873 | -5.703 | 5.703  | 1.00 | -0.07 |
| ATOM | 3290 | H    | PHE | 325 | -20.189 | -5.671 | 2.983  | 1.00 | 0.19  |
| ATOM | 3291 | HA   | PHE | 325 | -20.707 | -7.372 | 5.182  | 1.00 | 0.08  |
| ATOM | 3292 | HB2  | PHE | 325 | -20.530 | -5.424 | 6.688  | 1.00 | 0.05  |
| ATOM | 3293 | HB1  | PHE | 325 | -20.479 | -4.329 | 5.290  | 1.00 | 0.05  |
| ATOM | 3294 | HD1  | PHE | 325 | -18.540 | -7.146 | 4.196  | 1.00 | 0.06  |
| ATOM | 3295 | HD2  | PHE | 325 | -18.425 | -3.895 | 7.031  | 1.00 | 0.06  |
| ATOM | 3296 | HE1  | PHE | 325 | -16.103 | -7.206 | 4.180  | 1.00 | 0.06  |
| ATOM | 3297 | HE2  | PHE | 325 | -15.974 | -4.114 | 7.158  | 1.00 | 0.06  |
| ATOM | 3298 | HZ   | PHE | 325 | -14.793 | -5.801 | 5.751  | 1.00 | 0.06  |
| ATOM | 3299 | N    | LEU | 326 | -23.081 | -5.163 | 4.349  | 1.00 | -0.26 |
| ATOM | 3300 | CA   | LEU | 326 | -24.526 | -4.963 | 4.412  | 1.00 | 0.13  |
| ATOM | 3301 | C    | LEU | 326 | -25.217 | -6.234 | 3.973  | 1.00 | 0.20  |
| ATOM | 3302 | O    | LEU | 326 | -26.039 | -6.733 | 4.726  | 1.00 | -0.39 |
| ATOM | 3303 | CB   | LEU | 326 | -25.022 | -3.797 | 3.507  | 1.00 | -0.01 |
| ATOM | 3304 | CG   | LEU | 326 | -24.678 | -2.374 | 4.045  | 1.00 | -0.04 |
| ATOM | 3305 | CD1  | LEU | 326 | -24.849 | -1.321 | 2.913  | 1.00 | -0.06 |
| ATOM | 3306 | CD2  | LEU | 326 | -25.587 | -1.980 | 5.244  | 1.00 | -0.06 |
| ATOM | 3307 | H    | LEU | 326 | -22.537 | -4.567 | 3.747  | 1.00 | 0.19  |
| ATOM | 3308 | HA   | LEU | 326 | -24.813 | -4.767 | 5.455  | 1.00 | 0.08  |
| ATOM | 3309 | HB2  | LEU | 326 | -26.115 | -3.868 | 3.381  | 1.00 | 0.03  |
| ATOM | 3310 | HB1  | LEU | 326 | -24.574 | -3.928 | 2.511  | 1.00 | 0.03  |
| ATOM | 3311 | HG   | LEU | 326 | -23.622 | -2.349 | 4.367  | 1.00 | 0.03  |
| ATOM | 3312 | HD13 | LEU | 326 | -24.194 | -1.552 | 2.059  | 1.00 | 0.02  |
| ATOM | 3313 | HD12 | LEU | 326 | -24.586 | -0.314 | 3.273  | 1.00 | 0.02  |
| ATOM | 3314 | HD11 | LEU | 326 | -25.892 | -1.306 | 2.559  | 1.00 | 0.02  |
| ATOM | 3315 | HD23 | LEU | 326 | -26.649 | -2.112 | 4.988  | 1.00 | 0.02  |

|      |      |         |     |         |         |        |      |       |
|------|------|---------|-----|---------|---------|--------|------|-------|
| ATOM | 3316 | HD22LEU | 326 | -25.436 | -0.921  | 5.494  | 1.00 | 0.02  |
| ATOM | 3317 | HD21LEU | 326 | -25.367 | -2.577  | 6.141  | 1.00 | 0.02  |
| ATOM | 3318 | N ALA   | 327 | -24.917 | -6.796  | 2.780  | 1.00 | -0.26 |
| ATOM | 3319 | CA ALA  | 327 | -25.646 | -7.994  | 2.356  | 1.00 | 0.13  |
| ATOM | 3320 | C ALA   | 327 | -25.598 | -9.068  | 3.421  | 1.00 | 0.20  |
| ATOM | 3321 | O ALA   | 327 | -26.623 | -9.642  | 3.755  | 1.00 | -0.39 |
| ATOM | 3322 | CB ALA  | 327 | -25.100 | -8.596  | 1.037  | 1.00 | -0.02 |
| ATOM | 3323 | H ALA   | 327 | -24.226 | -6.389  | 2.172  | 1.00 | 0.19  |
| ATOM | 3324 | HA ALA  | 327 | -26.698 | -7.705  | 2.194  | 1.00 | 0.08  |
| ATOM | 3325 | HB3 ALA | 327 | -24.089 | -8.995  | 1.194  | 1.00 | 0.03  |
| ATOM | 3326 | HB2 ALA | 327 | -25.066 | -7.829  | 0.247  | 1.00 | 0.03  |
| ATOM | 3327 | HB1 ALA | 327 | -25.747 | -9.421  | 0.700  | 1.00 | 0.03  |
| ATOM | 3328 | N GLY   | 328 | -24.414 | -9.371  | 3.994  | 1.00 | -0.27 |
| ATOM | 3329 | CA GLY  | 328 | -24.395 | -10.378 | 5.053  | 1.00 | 0.12  |
| ATOM | 3330 | C GLY   | 328 | -25.205 | -9.943  | 6.255  | 1.00 | 0.20  |
| ATOM | 3331 | O GLY   | 328 | -25.661 | -10.810 | 6.984  | 1.00 | -0.39 |
| ATOM | 3332 | H GLY   | 328 | -23.566 | -8.898  | 3.727  | 1.00 | 0.19  |
| ATOM | 3333 | HA1 GLY | 328 | -24.831 | -11.307 | 4.659  | 1.00 | 0.08  |
| ATOM | 3334 | HA2 GLY | 328 | -23.372 | -10.620 | 5.375  | 1.00 | 0.08  |
| ATOM | 3335 | N ASP   | 329 | -25.421 | -8.629  | 6.503  | 1.00 | -0.26 |
| ATOM | 3336 | CA ASP  | 329 | -26.358 | -8.232  | 7.559  | 1.00 | 0.14  |
| ATOM | 3337 | C ASP   | 329 | -27.751 | -8.478  | 7.027  | 1.00 | 0.21  |
| ATOM | 3338 | O ASP   | 329 | -28.557 | -9.043  | 7.745  | 1.00 | -0.39 |
| ATOM | 3339 | CB ASP  | 329 | -26.232 | -6.765  | 8.068  | 1.00 | 0.03  |
| ATOM | 3340 | CG ASP  | 329 | -25.738 | -6.764  | 9.491  | 1.00 | 0.03  |
| ATOM | 3341 | OD1 ASP | 329 | -24.508 | -6.858  | 9.759  | 1.00 | -0.57 |
| ATOM | 3342 | OD2 ASP | 329 | -26.575 | -6.738  | 10.436 | 1.00 | -0.57 |
| ATOM | 3343 | H ASP   | 329 | -25.068 | -7.921  | 5.888  | 1.00 | 0.19  |
| ATOM | 3344 | HA ASP  | 329 | -26.235 | -8.903  | 8.426  | 1.00 | 0.08  |
| ATOM | 3345 | HB2 ASP | 329 | -27.219 | -6.287  | 8.072  | 1.00 | 0.05  |
| ATOM | 3346 | HB1 ASP | 329 | -25.586 | -6.147  | 7.434  | 1.00 | 0.05  |
| ATOM | 3347 | N THR   | 330 | -28.084 | -8.088  | 5.779  | 1.00 | -0.26 |
| ATOM | 3348 | CA THR  | 330 | -29.398 | -8.452  | 5.249  | 1.00 | 0.16  |
| ATOM | 3349 | C THR   | 330 | -29.611 | -9.942  | 5.405  | 1.00 | 0.21  |
| ATOM | 3350 | O THR   | 330 | -30.718 | -10.357 | 5.706  | 1.00 | -0.39 |
| ATOM | 3351 | CB THR  | 330 | -29.541 | -8.065  | 3.752  | 1.00 | 0.09  |
| ATOM | 3352 | OG1 THR | 330 | -29.183 | -6.676  | 3.623  | 1.00 | -0.39 |
| ATOM | 3353 | CG2 THR | 330 | -30.986 | -8.296  | 3.233  | 1.00 | -0.03 |
| ATOM | 3354 | H THR   | 330 | -27.446 | -7.579  | 5.192  | 1.00 | 0.19  |
| ATOM | 3355 | HA THR  | 330 | -30.163 | -7.915  | 5.832  | 1.00 | 0.08  |
| ATOM | 3356 | HB THR  | 330 | -28.848 | -8.685  | 3.159  | 1.00 | 0.06  |
| ATOM | 3357 | HG1 THR | 330 | -29.215 | -6.359  | 2.726  | 1.00 | 0.21  |
| ATOM | 3358 | HG22THR | 330 | -31.059 | -8.003  | 2.174  | 1.00 | 0.03  |
| ATOM | 3359 | HG21THR | 330 | -31.698 | -7.688  | 3.813  | 1.00 | 0.03  |
| ATOM | 3360 | HG23THR | 330 | -31.271 | -9.355  | 3.317  | 1.00 | 0.03  |
| ATOM | 3361 | N PHE   | 331 | -28.566 | -10.775 | 5.207  | 1.00 | -0.26 |
| ATOM | 3362 | CA PHE  | 331 | -28.729 | -12.206 | 5.459  | 1.00 | 0.14  |
| ATOM | 3363 | C PHE   | 331 | -28.848 | -12.467 | 6.947  | 1.00 | 0.21  |
| ATOM | 3364 | O PHE   | 331 | -29.699 | -13.252 | 7.334  | 1.00 | -0.39 |
| ATOM | 3365 | CB PHE  | 331 | -27.545 | -13.032 | 4.888  | 1.00 | 0.02  |
| ATOM | 3366 | CG PHE  | 331 | -27.196 | -12.752 | 3.414  | 1.00 | -0.04 |
| ATOM | 3367 | CD1 PHE | 331 | -28.037 | -12.041 | 2.546  | 1.00 | -0.06 |
| ATOM | 3368 | CD2 PHE | 331 | -25.976 | -13.232 | 2.923  | 1.00 | -0.06 |
| ATOM | 3369 | CE1 PHE | 331 | -27.643 | -11.779 | 1.231  | 1.00 | -0.07 |
| ATOM | 3370 | CE2 PHE | 331 | -25.585 | -12.986 | 1.604  | 1.00 | -0.07 |
| ATOM | 3371 | CZ PHE  | 331 | -26.420 | -12.257 | 0.754  | 1.00 | -0.07 |
| ATOM | 3372 | H PHE   | 331 | -27.670 | -10.420 | 4.918  | 1.00 | 0.19  |
| ATOM | 3373 | HA PHE  | 331 | -29.660 | -12.563 | 4.986  | 1.00 | 0.08  |

|        |      |         |     |         |         |        |      |       |
|--------|------|---------|-----|---------|---------|--------|------|-------|
| ATOM   | 3374 | HB2 PHE | 331 | -27.767 | -14.106 | 4.990  | 1.00 | 0.05  |
| ATOM   | 3375 | HB1 PHE | 331 | -26.654 | -12.812 | 5.497  | 1.00 | 0.05  |
| ATOM   | 3376 | HD1 PHE | 331 | -29.006 | -11.680 | 2.868  | 1.00 | 0.06  |
| ATOM   | 3377 | HD2 PHE | 331 | -25.320 | -13.806 | 3.570  | 1.00 | 0.06  |
| ATOM   | 3378 | HE1 PHE | 331 | -28.290 | -11.203 | 0.576  | 1.00 | 0.06  |
| ATOM   | 3379 | HE2 PHE | 331 | -24.635 | -13.364 | 1.239  | 1.00 | 0.06  |
| ATOM   | 3380 | HZ PHE  | 331 | -26.125 | -12.065 | -0.272 | 1.00 | 0.06  |
| ATOM   | 3381 | N ARG   | 332 | -28.015 | -11.837 | 7.809  | 1.00 | -0.26 |
| ATOM   | 3382 | CA ARG  | 332 | -28.209 | -11.965 | 9.256  | 1.00 | 0.13  |
| ATOM   | 3383 | C ARG   | 332 | -29.074 | -10.816 | 9.736  | 1.00 | 0.25  |
| ATOM   | 3384 | O ARG   | 332 | -28.664 | -10.015 | 10.567 | 1.00 | -0.33 |
| ATOM   | 3385 | CB ARG  | 332 | -26.853 | -11.983 | 10.020 | 1.00 | -0.01 |
| ATOM   | 3386 | CG ARG  | 332 | -27.082 | -12.300 | 11.531 | 1.00 | -0.02 |
| ATOM   | 3387 | CD ARG  | 332 | -26.020 | -11.723 | 12.522 | 1.00 | 0.06  |
| ATOM   | 3388 | NE ARG  | 332 | -25.035 | -10.739 | 12.044 | 1.00 | -0.27 |
| ATOM   | 3389 | CZ ARG  | 332 | -25.309 | -9.494  | 11.715 | 1.00 | 0.29  |
| ATOM   | 3390 | NH1 ARG | 332 | -26.527 | -9.028  | 11.613 | 1.00 | -0.28 |
| ATOM   | 3391 | NH2 ARG | 332 | -24.309 | -8.684  | 11.472 | 1.00 | -0.28 |
| ATOM   | 3392 | H ARG   | 332 | -27.310 | -11.205 | 7.477  | 1.00 | 0.19  |
| ATOM   | 3393 | HA ARG  | 332 | -28.736 | -12.901 | 9.503  | 1.00 | 0.08  |
| ATOM   | 3394 | HB2 ARG | 332 | -26.374 | -11.009 | 9.862  | 1.00 | 0.03  |
| ATOM   | 3395 | HB1 ARG | 332 | -26.188 | -12.743 | 9.576  | 1.00 | 0.03  |
| ATOM   | 3396 | HG2 ARG | 332 | -27.149 | -13.397 | 11.635 | 1.00 | 0.03  |
| ATOM   | 3397 | HG1 ARG | 332 | -28.066 | -11.938 | 11.867 | 1.00 | 0.03  |
| ATOM   | 3398 | HD2 ARG | 332 | -25.453 | -12.588 | 12.914 | 1.00 | 0.07  |
| ATOM   | 3399 | HD1 ARG | 332 | -26.517 | -11.290 | 13.408 | 1.00 | 0.07  |
| ATOM   | 3400 | HE ARG  | 332 | -24.048 | -11.042 | 12.043 | 1.00 | 0.26  |
| ATOM   | 3401 | HH11ARG | 332 | -27.354 | -9.629  | 11.719 | 1.00 | 0.26  |
| ATOM   | 3402 | HH12ARG | 332 | -26.698 | -8.041  | 11.349 | 1.00 | 0.26  |
| ATOM   | 3403 | HH21ARG | 332 | -23.335 | -8.993  | 11.530 | 1.00 | 0.26  |
| ATOM   | 3404 | HH22ARG | 332 | -24.470 | -7.698  | 11.197 | 1.00 | 0.26  |
| TER    | 3405 | ARG     | 332 |         |         |        |      |       |
| HETATM | 3406 | N NH    | 1   | -33.511 | -5.847  | 18.096 | 1.00 | -0.24 |
| HETATM | 3407 | H NH    | 1   | -32.742 | -6.393  | 18.465 | 1.00 | 0.20  |
| HETATM | 3408 | N NH    | 2   | 1.112   | 21.661  | 0.436  | 1.00 | -0.85 |
| HETATM | 3409 | H NH    | 2   | 1.000   | 21.413  | 1.407  | 1.00 | -0.15 |
| HETATM | 3410 | N NH    | 3   | -19.579 | -13.598 | 9.389  | 1.00 | -0.24 |
| HETATM | 3411 | H NH    | 3   | -20.112 | -13.019 | 10.017 | 1.00 | 0.20  |
| HETATM | 3412 | N NH    | 4   | 12.511  | 0.741   | 2.419  | 1.00 | -0.24 |
| HETATM | 3413 | H NH    | 4   | 11.917  | 1.269   | 1.798  | 1.00 | 0.20  |
| HETATM | 3414 | N NH    | 5   | -13.908 | -25.050 | 5.295  | 1.00 | -0.35 |
| HETATM | 3415 | H NH    | 5   | -14.903 | -25.042 | 5.480  | 1.00 | 0.18  |
| HETATM | 3416 | H NH    | 5   | -13.529 | -24.377 | 4.635  | 1.00 | 0.18  |
| HETATM | 3417 | N NH    | 6   | 13.466  | 9.682   | -4.478 | 1.00 | -0.24 |
| HETATM | 3418 | H NH    | 6   | 13.261  | 9.962   | -5.428 | 1.00 | 0.20  |
| HETATM | 3419 | N NH    | 7   | -30.247 | -10.704 | 9.261  | 1.00 | -0.24 |
| HETATM | 3420 | H NH    | 7   | -30.840 | -9.937  | 9.537  | 1.00 | 0.20  |
| HETATM | 3421 | N2 MRS  | 8   | -3.940  | 4.810   | 0.487  | 1.00 | -0.30 |
| HETATM | 3422 | C1 MRS  | 8   | -3.064  | 3.970   | 0.858  | 1.00 | 0.11  |
| HETATM | 3423 | N5 MRS  | 8   | -3.535  | 2.751   | 0.848  | 1.00 | -0.19 |
| HETATM | 3424 | C4 MRS  | 8   | -4.819  | 2.831   | 0.419  | 1.00 | 0.16  |
| HETATM | 3425 | C3 MRS  | 8   | -5.085  | 4.174   | 0.205  | 1.00 | 0.10  |
| HETATM | 3426 | C6 MRS  | 8   | -6.339  | 4.613   | -0.215 | 1.00 | 0.12  |
| HETATM | 3427 | N7 MRS  | 8   | -7.246  | 3.648   | -0.487 | 1.00 | -0.27 |
| HETATM | 3428 | C8 MRS  | 8   | -6.963  | 2.334   | -0.305 | 1.00 | 0.05  |
| HETATM | 3429 | N9 MRS  | 8   | -5.774  | 1.914   | 0.186  | 1.00 | -0.27 |
| HETATM | 3430 | H22 MRS | 8   | -7.710  | 1.593   | -0.561 | 1.00 | 0.10  |
| HETATM | 3431 | N10 MRS | 8   | -6.653  | 5.983   | -0.342 | 1.00 | -0.25 |

|             |                          |   |         |         |        |      |       |
|-------------|--------------------------|---|---------|---------|--------|------|-------|
| HETATM 3432 | C23 MRS                  | 8 | -6.312  | 6.914   | 0.752  | 1.00 | 0.01  |
| HETATM 3433 | H28 MRS                  | 8 | -5.223  | 7.041   | 0.847  | 1.00 | 0.04  |
| HETATM 3434 | H39 MRS                  | 8 | -6.709  | 6.525   | 1.702  | 1.00 | 0.04  |
| HETATM 3435 | H40 MRS                  | 8 | -6.766  | 7.898   | 0.561  | 1.00 | 0.04  |
| HETATM 3436 | H24 MRS                  | 8 | -6.305  | 6.358   | -1.298 | 1.00 | 0.16  |
| HETATM 3437 | C11 MRS                  | 8 | -2.821  | 1.528   | 1.201  | 1.00 | 0.18  |
| HETATM 3438 | O12 MRS                  | 8 | -1.401  | 1.826   | 1.337  | 1.00 | -0.34 |
| HETATM 3439 | C13 MRS                  | 8 | -0.674  | 0.850   | 0.561  | 1.00 | 0.11  |
| HETATM 3440 | C14 MRS                  | 8 | -1.608  | 0.795   | -0.657 | 1.00 | 0.07  |
| HETATM 3441 | C15 MRS                  | 8 | -2.940  | 0.505   | 0.038  | 1.00 | 0.03  |
| HETATM 3442 | H17 MRS                  | 8 | -3.798  | 0.638   | -0.635 | 1.00 | 0.03  |
| HETATM 3443 | H27 MRS                  | 8 | -2.942  | -0.537  | 0.397  | 1.00 | 0.03  |
| HETATM 3444 | O18 MRS                  | 8 | -1.274  | -0.102  | -1.717 | 1.00 | -0.43 |
| HETATM 3445 | P29 MRS                  | 8 | -0.710  | -1.586  | -1.599 | 1.00 | 0.30  |
| HETATM 3446 | O36 MRS                  | 8 | 0.645   | -1.472  | -2.209 | 1.00 | -0.41 |
| HETATM 3447 | O37 MRS                  | 8 | -0.553  | -2.073  | -0.086 | 1.00 | -0.31 |
| HETATM 3448 | O38 MRS                  | 8 | -1.687  | -2.582  | -2.375 | 1.00 | -0.31 |
| HETATM 3449 | H26 MRS                  | 8 | -1.649  | 1.815   | -1.062 | 1.00 | 0.06  |
| HETATM 3450 | C19 MRS                  | 8 | 0.811   | 1.090   | 0.170  | 1.00 | 0.05  |
| HETATM 3451 | O20 MRS                  | 8 | 1.061   | 1.981   | -0.933 | 1.00 | -0.43 |
| HETATM 3452 | P32 MRS                  | 8 | 2.599   | 2.251   | -1.283 | 1.00 | 0.30  |
| HETATM 3453 | O33 MRS                  | 8 | 3.286   | 0.932   | -1.375 | 1.00 | -0.41 |
| HETATM 3454 | O34 MRS                  | 8 | 3.273   | 3.181   | -0.170 | 1.00 | -0.31 |
| HETATM 3455 | O35 MRS                  | 8 | 2.649   | 3.086   | -2.652 | 1.00 | -0.31 |
| HETATM 3456 | H30 MRS                  | 8 | 1.373   | 1.440   | 1.042  | 1.00 | 0.06  |
| HETATM 3457 | H31 MRS                  | 8 | 1.220   | 0.110   | -0.114 | 1.00 | 0.06  |
| HETATM 3458 | H25 MRS                  | 8 | -0.710  | -0.076  | 1.158  | 1.00 | 0.06  |
| HETATM 3459 | H16 MRS                  | 8 | -3.239  | 1.093   | 2.121  | 1.00 | 0.10  |
| HETATM 3460 | H21 MRS                  | 8 | -2.059  | 4.256   | 1.153  | 1.00 | 0.14  |
| HETATM 3461 | N NH                     | 9 | -13.543 | -22.173 | 5.459  | 1.00 | -0.24 |
| HETATM 3462 | H NH                     | 9 | -14.303 | -21.545 | 5.248  | 1.00 | 0.20  |
| CONNECT     | 1 2 3 7                  |   |         |         |        |      |       |
| CONNECT     | 3 1 4 5 6                |   |         |         |        |      |       |
| CONNECT     | 4 3                      |   |         |         |        |      |       |
| CONNECT     | 5 3                      |   |         |         |        |      |       |
| CONNECT     | 6 3                      |   |         |         |        |      |       |
| CONNECT     | 7 1 8 18                 |   |         |         |        |      |       |
| CONNECT     | 521 520 522 3406         |   |         |         |        |      |       |
| CONNECT     | 544 545 546 550          |   |         |         |        |      |       |
| CONNECT     | 546 544 547 548 549      |   |         |         |        |      |       |
| CONNECT     | 547 546                  |   |         |         |        |      |       |
| CONNECT     | 548 546                  |   |         |         |        |      |       |
| CONNECT     | 549 546                  |   |         |         |        |      |       |
| CONNECT     | 550 544 551 556          |   |         |         |        |      |       |
| CONNECT     | 1008 1009 1010 1014      |   |         |         |        |      |       |
| CONNECT     | 1010 1008 1011 1012 1013 |   |         |         |        |      |       |
| CONNECT     | 1011 1010                |   |         |         |        |      |       |
| CONNECT     | 1012 1010                |   |         |         |        |      |       |
| CONNECT     | 1013 1010                |   |         |         |        |      |       |
| CONNECT     | 1014 1008 1015 1023      |   |         |         |        |      |       |
| CONNECT     | 1423 1422 1424 3410      |   |         |         |        |      |       |
| CONNECT     | 1446 1447 1448 1452      |   |         |         |        |      |       |
| CONNECT     | 1448 1446 1449 1450 1451 |   |         |         |        |      |       |
| CONNECT     | 1449 1448                |   |         |         |        |      |       |
| CONNECT     | 1450 1448                |   |         |         |        |      |       |
| CONNECT     | 1451 1448                |   |         |         |        |      |       |
| CONNECT     | 1452 1446 1453 1461      |   |         |         |        |      |       |
| CONNECT     | 1900 1899 1901 3412      |   |         |         |        |      |       |

CONNECT 1910 1911 1912 1916  
CONNECT 1912 1910 1913 1914 1915  
CONNECT 1913 1912  
CONNECT 1914 1912  
CONNECT 1915 1912  
CONNECT 1916 1910 1917 1927  
CONNECT 2375 2374 2376 3461  
CONNECT 2384 2385 2386 2390  
CONNECT 2386 2384 2387 2388 2389  
CONNECT 2387 2386  
CONNECT 2388 2386  
CONNECT 2389 2386  
CONNECT 2390 2384 2391 2402  
CONNECT 2856 2855 2857 3417  
CONNECT 2879 2880 2881 2885  
CONNECT 2881 2879 2882 2883 2884  
CONNECT 2882 2881  
CONNECT 2883 2881  
CONNECT 2884 2881  
CONNECT 2885 2879 2886 2893  
CONNECT 3383 3382 3384 3419  
CONNECT 3406 521 3407  
CONNECT 3407 3406  
CONNECT 3408 3409  
CONNECT 3409 3408  
CONNECT 3410 1423 3411  
CONNECT 3411 3410  
CONNECT 3412 1900 3413  
CONNECT 3413 3412  
CONNECT 3414 3415 3416  
CONNECT 3415 3414  
CONNECT 3416 3414  
CONNECT 3417 2856 3418  
CONNECT 3418 3417  
CONNECT 3419 3383 3420  
CONNECT 3420 3419  
CONNECT 3421 3422 3425  
CONNECT 3422 3421 3423 3460  
CONNECT 3423 3422 3424 3437  
CONNECT 3424 3423 3425 3429  
CONNECT 3425 3421 3424 3426  
CONNECT 3426 3425 3427 3431  
CONNECT 3427 3426 3428  
CONNECT 3428 3427 3429 3430  
CONNECT 3429 3424 3428  
CONNECT 3430 3428  
CONNECT 3431 3426 3432 3436  
CONNECT 3432 3431 3433 3434 3435  
CONNECT 3433 3432  
CONNECT 3434 3432  
CONNECT 3435 3432  
CONNECT 3436 3431  
CONNECT 3437 3423 3438 3441 3459  
CONNECT 3438 3437 3439  
CONNECT 3439 3438 3440 3450 3458  
CONNECT 3440 3439 3441 3444 3449  
CONNECT 3441 3437 3440 3442 3443  
CONNECT 3442 3441

CONNECT 3443 3441  
CONNECT 3444 3440 3445  
CONNECT 3445 3444 3446 3447 3448  
CONNECT 3446 3445  
CONNECT 3447 3445  
CONNECT 3448 3445  
CONNECT 3449 3440  
CONNECT 3450 3439 3451 3456 3457  
CONNECT 3451 3450 3452  
CONNECT 3452 3451 3453 3454 3455  
CONNECT 3453 3452  
CONNECT 3454 3452  
CONNECT 3455 3452  
CONNECT 3456 3450  
CONNECT 3457 3450  
CONNECT 3458 3439  
CONNECT 3459 3437  
CONNECT 3460 3422  
CONNECT 3461 2375 3462  
CONNECT 3462 3461  
MASTER 0 0 0 0 0 0 0 0 03455 7 105 20  
END
